# Supplementary material for: An observational study of giant cell interstitial pneumonia and lung fibrosis in hard metal lung disease
Source: PubMed Central journal article supplement — BMJ Open. 2014 Mar 27;4(3):e004407. doi: 10.1136/bmjopen-2013-004407 (PMC3975739; doi:10.1136/bmjopen-2013-004407), 2014-03-27
Supplement: bmjopen-2013-004407.draft_revisions.pdf [file bmjopen-2013-004407.draft_revisions.pdf]

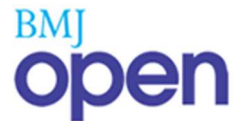

## Giant Cell Interstitial Pneumonia and Lung Fibrosis in Hard Metal Lung Disease

|                                 |                                                                                                                                                                                                                                                                                                                                                                                                                                                                                                     |
|---------------------------------|-----------------------------------------------------------------------------------------------------------------------------------------------------------------------------------------------------------------------------------------------------------------------------------------------------------------------------------------------------------------------------------------------------------------------------------------------------------------------------------------------------|
| Journal:                        | <i>BMJ Open</i>                                                                                                                                                                                                                                                                                                                                                                                                                                                                                     |
| Manuscript ID:                  | bmjopen-2013-004407                                                                                                                                                                                                                                                                                                                                                                                                                                                                                 |
| Article Type:                   | Research                                                                                                                                                                                                                                                                                                                                                                                                                                                                                            |
| Date Submitted by the Author:   | 05-Nov-2013                                                                                                                                                                                                                                                                                                                                                                                                                                                                                         |
| Complete List of Authors:       | Takada, Toshinori; Niigata University, Division of Respiratory Medicine<br>Tanaka, Junichi; Niigata University, Division of Respiratory Medicine<br>Moriyama, Hiroshi; Niigata University, Division of Respiratory Medicine<br>Terada, Masaki; Niigata University, Division of Respiratory Medicine<br>Suzuki, Eiichi<br>Narita, Ichiei; Niigata University, Division of Respiratory Medicine<br>Kawabata, Yoshinori<br>Yamaguchi, Tetsuo<br>Hebisawa, Akira<br>Sakai, Fumikazu<br>Arakawa, Hiroaki |
| <b>Primary Subject Heading</b>: | Occupational and environmental medicine                                                                                                                                                                                                                                                                                                                                                                                                                                                             |
| Secondary Subject Heading:      | Occupational and environmental medicine                                                                                                                                                                                                                                                                                                                                                                                                                                                             |
| Keywords:                       | OCCUPATIONAL & INDUSTRIAL MEDICINE, Tropical medicine < INTERNAL MEDICINE, Interstitial lung disease < THORACIC MEDICINE                                                                                                                                                                                                                                                                                                                                                                            |
|                                 |                                                                                                                                                                                                                                                                                                                                                                                                                                                                                                     |

SCHOLARONE™  
Manuscripts

only

## Giant Cell Interstitial Pneumonia and Lung Fibrosis in Hard Metal Lung Disease

<sup>1</sup>Junichi Tanaka, MD, <sup>1</sup>Toshinori Takada, <sup>1</sup>Hiroshi Moriyama, MD, <sup>1</sup>Masaki Terada, MD, MD, <sup>2</sup>Eiichi Suzuki, MD, <sup>1</sup>Ichiei Narita, MD, <sup>3</sup>Yoshinori Kawabata, MD, <sup>3</sup>Tetsuo Yamaguchi, MD, <sup>3</sup>Akira Hebisawa, MD, <sup>3</sup>Fumikazu Sakai, MD, and <sup>3</sup>Hiroaki Arakawa, MD,

<sup>1</sup>Division of Respiratory Medicine, Graduate School of Medical and Dental Sciences, Niigata University, Niigata, Japan, <sup>2</sup>Department of General Medicine, Niigata University Medical and Dental Hospital, Niigata, Japan, <sup>3</sup>Tokyo Research Group for Diffuse Parenchymal Lung Diseases, Tokyo, Japan

Corresponding author: Toshinori Takada, M.D., PhD

Division of Respiratory Medicine, Graduate School of Medical and Dental Sciences, Niigata University

1-757 Asahimachi-dori, Chuo-ku, Niigata, 951-8510, Japan

Tel; +81-25-227-2200, Fax; +81-25-227-0775, Email; ttakada@med.niigata-u.ac.jp

Keywords: hard metal, pulmonary fibrosis, electron probe microanalysis

Word count: 2,620

**ABSTRACT**

**Background:** Hard metal lung disease has a variety of pathological patterns including giant cell interstitial pneumonia (GIP) and usual interstitial pneumonia (UIP). Although UIP pattern is considered the prominent feature in advanced disease, it is unknown whether GIP finally progresses to UIP pattern or not.

**Objective:** To clarify clinical, pathological, and elemental differences between GIP and UIP pattern in hard metal lung disease.

**Methods:** We obtained the clinical records, chest CT, and lung tissue from nineteen cases diagnosed as hard metal lung disease. Lung tissue was elementally analyzed by electron probe microanalyser. We classified the patients into two groups according to the pathological findings and statistically compared clinical data.

**Results:** Fourteen cases were pathologically diagnosed as GIP or centrilobular inflammation/fibrosis. The other five cases were UIP pattern or upper lobe fibrosis. Elemental analyses of lung specimens of GIP showed tungsten throughout the centrilobular fibrotic areas. In UIP pattern, tungsten was detected in periarteriolar area and subpleural fibrosis in no association with centrilobular fibrosis or inflammatory cell infiltration. The GIP group was younger ( $p<0.01$ ), had shorter exposure duration ( $p<0.01$ ), lower serum KL-6 ( $p<0.05$ ), and higher lymphocyte percentage in bronchoalveolar lavage fluid ( $p<0.05$ ) than the fibrosis group.

**Conclusions** UIP pattern or upper lobe fibrosis is remarkably different from GIP in distribution of hard metal elements, associated interstitial inflammation and fibrosis, and clinical features. In hard metal lung disease, UIP pattern or upper lobe fibrosis

1  
2  
3  
4  
5  
6 may not be an advanced form of GIP.  
7  
8  
9

### 10 **Strengths and limitations of this study**

11  
12  
13 1, Nineteen cases of hard metal lung disease, a rare occupational lung disease, were  
14 collected and their clinical features were documented.  
15

16  
17  
18 2, Lung tissue from all the patients was elementally analyzed by a patented technique,  
19 an improved element analysis using electron probe microanalyzers with wavelength  
20 dispersive spectrometer.  
21  
22  
23

24  
25 3, Since the relative frequencies of incidence of hard metal lung disease and IPF, the  
26 probability that someone with hard metal exposure will develop idiopathic UIP/IPF  
27 cannot be inferred.  
28  
29  
30  
31  
32  
33  
34  
35  
36  
37  
38  
39  
40  
41  
42  
43  
44  
45  
46  
47  
48  
49  
50  
51  
52  
53  
54  
55  
56  
57  
58  
59  
60

## INTRODUCTION

Hard metal is a synthetic compound that combines tungsten carbide with cobalt. Patients exposed to hard metal may develop occupational asthma, a syndrome resembling hypersensitivity pneumonitis, and interstitial lung disease which is recognized as hard metal lung disease.[1-3] In many cases with hard metal lung disease, multinucleated giant cells with centrilobular fibrosis is prominent resulting in a pattern of giant cell interstitial pneumonia (GIP).[4-6] We demonstrated that hard metal accumulated in the centrilobular area may trigger the inflammation in cooperation with CD163<sup>+</sup> monocyte-macrophages and CD8<sup>+</sup> lymphocytes using electron probe microanalyzers with wavelength dispersive spectrometer (EPMA-WDS).[7] In addition to classical GIP, hard metal lung disease has a variety of pathological patterns, desquamative interstitial pneumonia, obliterative bronchiolitis, and usual interstitial pneumonia (UIP) pattern.[4, 8] The lesions of classical GIP are usually centered on the centrilobular areas. On the other hand, the key histologic features of the UIP are predominantly distributed at the periphery of the acinus or lobule.[9, 10] Hard metal lung disease has pathological patterns of both GIP and UIP, and the UIP pattern is thought to be the prominent feature in advanced cases of the disease. The key question is whether UIP pattern is an advanced form of GIP or not. In order to elucidate relationship between GIP and lung fibrosis with detection of hard metal elements, we collected cases with tungsten in lung tissue and reviewed their clinical records. We then elementally reexamined lung specimens by EPMA-WDS. We finally classified the patients into two groups according to the histological findings and statistically

1  
2  
3  
4  
5  
6 compared their clinical features. Pathological and elemental analyses in the study  
7  
8 suggest that UIP pattern or upper lobe fibrosis may be different from an end-stage form  
9  
10 of GIP.  
11  
12  
13

## 14 15 **METHODS**

### 16 17 **Patient population**

18  
19 We performed a nationwide survey by announcing inquiry for cases of hard metal lung  
20  
21 disease to the major medical institutes and hospitals all over the country for the 10th  
22  
23 annual meeting of the Tokyo Research Group for Diffuse Parenchymal Lung Diseases.  
24  
25 Nineteen patients were finally diagnosed as hard metal lung disease because of presence  
26  
27 of tungsten in lung specimens detected by EPMA-WDS. We obtained information of  
28  
29 patient profile such as age, gender, duration of hard metal exposure, history of  
30  
31 pneumothorax, history of allergy, symptoms, physical findings, serum levels of Krebs  
32  
33 von den Lungen-6 (KL-6) and SP-D, arterial blood gas data, pulmonary function tests,  
34  
35 bronchoalveolar lavage (BAL) cell profiles and treatment and prognosis in order to  
36  
37 make a data base. We acquired consent from all treating physicians for each identified  
38  
39 case according to the Guidelines for Epidemiological Studies from The Ministry of  
40  
41 Health, Labor and Welfare. The Committee of Ethics, Niigata University, approved  
42  
43 the EPMA-WDS study protocol (#396).  
44  
45  
46  
47  
48  
49  
50  
51  
52  
53

### 54 55 **HRCT scan findings**

56  
57  
58  
59  
60

1  
2  
3  
4  
5  
6 All patients with hard metal lung disease except one underwent high-resolution  
7  
8 computed tomography (HRCT) scanning. Two radiologists (observers) who were  
9  
10 blinded to clinical, laboratory, or pulmonary function test results evaluated CT scan  
11  
12 findings. The observers judged each CT scan for the presence or absence of three  
13  
14 main features of centrilobular nodules, ground glass opacity, and pneumothorax. They  
15  
16 also noted other remarkable findings; traction bronchiectasis, reticular pattern,  
17  
18 subpleural linear opacity, consolidation, bulla, centrilobular emphysema, atelectasis, and  
19  
20 bronchial wall thickening and entered these results into a data sheet independently.  
21  
22 After evaluation, disagreement on the results between the observers for some HRCT  
23  
24 scans was resolved by discussion and consensus.  
25  
26  
27  
28  
29  
30  
31

### 32 **Sample preparation and pathological study**

33  
34 Each tissue sample was serially cut into 3  $\mu\text{m}$ -thickness sections and subjected to  
35  
36 pathological study and EPMA-WDS analysis. For pathological study, formalin-fixed 3  
37  
38  $\mu\text{m}$  serial sections were stained with hematoxylin-eosine and Elastica van Gieson  
39  
40 method. Two pathologists (observers), who were blinded to clinical, laboratory, or  
41  
42 pulmonary function test results, evaluated pathological findings. After evaluation,  
43  
44 disagreement on the pathological diagnoses between the observers for some specimens  
45  
46 was resolved by discussion and consensus.  
47  
48  
49  
50  
51

### 52 **Electron probe microanalysis**

53  
54 Examination of tissue sections with EMPA-WDS was performed according to  
55  
56  
57  
58  
59  
60

1  
2  
3  
4  
5  
6 procedures previously described.[11] X-ray data were obtained with an EPMA-WDS  
7  
8 (EPMA 8705, EPMA-1610, Shimadzu Ltd, Kyoto, Japan). For qualitative element  
9  
10 analysis, three areas of 5 x 5 µm to 10 x 10 µm in the centrilobular legion of GIP or  
11  
12 fibrosing lesion of interstitial lung diseases were screened. The distribution of amino  
13  
14 nitrogen corresponding to the pathological image was also mapped for each sample.  
15  
16  
17  
18  
19

### 20 **Statistical analysis**

21  
22 Comparisons of categorical data were made with chi-square or Fisher's exact test.  
23  
24 Nonparametric numeric data were compared by Mann-Whitney's U-test. A p Value  
25  
26 <0.05 was considered significant.  
27  
28  
29  
30  
31

## 32 **RESULTS**

### 33 **Characteristics of subject**

34  
35  
36 Clinical features are summarized in Table 1 and 2. Demographic findings in 8 of these  
37  
38 patients have been reported previously.[7] All the subjects had an occupational history  
39  
40 of hard metal industry for 1 to 36 years. One patient (case 15) was doing deskwork in  
41  
42 an insufficiently ventilated room of a hard metal grinding company. Five patients had  
43  
44 occupational history of hard metal industry but were not exposed at the diagnosis of  
45  
46 hard metal lung disease. Five patients (case 2, 5, 7, 8, and 15) had an allergic history  
47  
48 and were patch tested for Co, Ni, Cr, Hg, Au, Zn, Mn, Ag, Pd, Pt, Sn, Cu, Fe, Al, In, Ir,  
49  
50 Ti. 4 of 5 patients (case 2, 5, 7, and 15) were found to be positive for cobalt.  
51  
52  
53  
54  
55  
56  
57  
58  
59  
60  
61  
62  
63  
64  
65  
66  
67  
68  
69  
70  
71  
72  
73  
74  
75  
76  
77  
78  
79  
80  
81  
82  
83  
84  
85  
86  
87  
88  
89  
90  
91  
92  
93  
94  
95  
96  
97  
98  
99  
100  
Pulmonary function tests revealed restrictive lung defect characterized by reduced vital



capacity and lung diffusing capacity. BAL findings showed increased total cell counts, increased lymphocytes and eosinophils, with normal CD4/CD8 ratio. Bizarre multinucleated giant cells were not noted in BAL.

**Table 1. Demographic features of subjects**

| Patient | Age | Sex | Smoking history | Occupational history (hard metal exposure) | Exposure duration (months) | Exposure at diagnosis |
|---------|-----|-----|-----------------|--------------------------------------------|----------------------------|-----------------------|
| 1       | 39  | M   | non             | Hard metal shaping/drilling                | 12                         | No                    |
| 2       | 53  | M   | ex              | Hard metal shaping/drilling                | 30                         | No                    |
| 3       | 21  | M   | non             | Metal grinding                             | 32                         | Yes                   |
| 4       | 42  | M   | ex              | Hard metal shaping/drilling                | 36                         | Yes                   |
| 5       | 48  | M   | non             | Metal grinding                             | 48                         | NA                    |
| 6       | 45  | M   | non             | Hard metal shaping/drilling                | 60                         | Yes                   |
| 7       | 32  | F   | non             | Metal grinding                             | 60                         | Yes                   |
| 8       | 32  | F   | non             | Metal grinding                             | 72                         | No                    |
| 9       | 44  | F   | non             | Hard metal shaping/drilling                | 72                         | Yes                   |
| 10      | 62  | M   | non             | Metal grinding                             | 72                         | No                    |
| 11      | 40  | F   | non             | Hard metal shaping/drilling                | 96                         | NA                    |
| 12      | 48  | M   | non             | Metal grinding                             | 120                        | NA                    |
| 13      | 49  | F   | non             | Hard metal shaping/drilling                | 120                        | Yes                   |
| 14      | 65  | F   | non             | Metal grinding                             | 144                        | No                    |
| 15      | 50  | F   | non             | Desk worker in hard metal factory          | 168                        | Yes                   |
| 16      | 53  | M   | non             | Quality control of hard metals             | 264                        | NA                    |
| 17      | 60  | M   | ex              | Hard metal shaping/drilling                | 276                        | Yes                   |
| 18      | 53  | M   | non             | Hard metal shaping/drilling                | 372                        | Yes                   |
| 19      | 65  | M   | non             | Hard metal shaping/drilling                | 444                        | Yes                   |

Abbreviation; NA, not available

**Table 2. Clinical characteristics of Patients with Hard metal lung disease**

|                                         | Value                             |
|-----------------------------------------|-----------------------------------|
| Mean age at diagnosis (yrs)             | 46.4 ± 14.1 (21 - 65)             |
| Gender M/F                              | 12/7                              |
| Smoking history Cur/Ex/Never            | 0/3/16                            |
| Chief complaints dry cough              | 13/19                             |
| breath shortness                        | 8/19                              |
| Pneumothorax Yes                        | 8/19                              |
| Allergic history Yes                    | 5/19                              |
| Patch test to cobalt positive           | 4/5                               |
| Mean exposure duration (yrs)            | 10.7 ± 10.3 (1 - 36)              |
| Physical findings rales on auscultation | 11/19                             |
| fine crackles                           | 8/19                              |
| finger clubbing                         | 4/18                              |
| edema of leg                            | 1/16                              |
| Laboratory tests KL-6                   | 502.7 ± 267.5 U/ml                |
| SP-D                                    | 216.1 ± 192.4 ng/ml               |
| Pulmonary function tests                |                                   |
| %VC                                     | 64.8 ± 25.3 %                     |
| FEV <sub>1</sub> %                      | 85.6 ± 10.7 %                     |
| %DLco                                   | 53.4 ± 17.0 %                     |
| Bronchoalveolar lavage                  |                                   |
| Total cell count                        | 3.13 ± 2.11 × 10 <sup>5</sup> /ml |
| Lymphocytes                             | 24.3 ± 22.3 %                     |
| Neutrophils                             | 3.07 ± 2.86 %                     |
| Eosinophils                             | 3.01 ± 5.03 %                     |
| CD4/8 ratio                             | 1.65 ± 2.96                       |

The mean numbers ± standard deviations and ranges in parentheses are shown.

### Radiological findings

HRCT of all patients except one with hard metal lung disease were available for review

of radiological findings. Conventional CT findings of case 12 were added to the table (Table 3). Centrilobular nodules (Fig 1 A, B) and ground glass opacity were identified in chest CT of 16 patients. In some patients, reticular opacities, traction bronchiectasis, and subpleural curvilinear opacities were also present (Fig 1 C, D). Although centrilobular micronodular opacities were noted in those patients, they were unremarkable.

**Table 3. Radiologic findings of patients with hard metal lung disease**

| Patient | CT features           |                        |              | other findings                                                     |
|---------|-----------------------|------------------------|--------------|--------------------------------------------------------------------|
|         | centrilobular nodules | ground-glass opacities | pneumothorax |                                                                    |
| 1       | +                     | -                      | -            | bronchial wall thickening                                          |
| 2       | +                     | +                      | -            | reticular opacities                                                |
| 3       | +                     | +                      | +            |                                                                    |
| 4       | +                     | -                      | +            | subpleural curvilinear opacities                                   |
| 5       | +                     | +                      | -            |                                                                    |
| 6       | -                     | +                      | -            | reticular opacities, consolidation                                 |
| 7       | +                     | +                      | +            |                                                                    |
| 8       | +                     | +                      | -            | traction bronchiectasis                                            |
| 9       | +                     | +                      | -            |                                                                    |
| 10      | +                     | +                      | -            | reticular opacities, traction bronchiectasis                       |
| 11      | +                     | -                      | +            |                                                                    |
| 12      | +                     | +                      | +            | subpleural curvilinear opacities                                   |
| 13      | +                     | +                      | -            |                                                                    |
| 14      | +                     | +                      | -            | traction bronchiectasis, apical cap                                |
| 15      | +                     | +                      | +            | traction bronchiectasis                                            |
| 16      | -                     | +                      | +            | subpleural/peribronchovascular consolidation<br>atelectasis, bulla |
| 17      | +                     | +                      | -            | bulla, centrilobular emphysema                                     |
| 18      | -                     | +                      | -            | reticular opacities                                                |
| 19      | +                     | +                      | -            | reticular opacities                                                |

---

### Pathological findings and elemental analysis

Pathological findings and detected elements in lung tissue of 19 cases were summarized in Table 4. Four major histological features noted in this study were as follows: GIP characterized with centrilobular fibrosis (Fig 2 A, B) and characteristic giant cells showing cannibalism (Fig 2 C), centrilobular inflammation/fibrosis similar to GIP but without giant cells, UIP pattern characterized with patchy distribution and temporal heterogeneity, and dense fibrosis with fibroblastic foci (Fig 3 A, B, D, E, F) [12], upper lobe fibrosis characterized with apical scar/cap type fibrosis mainly in the upper lobe.[13]

Elemental analyses of lung specimens of GIP and centrilobular inflammation/fibrosis demonstrated that tungsten was mapped almost throughout the centrilobular fibrotic areas (Fig 2 D, E). Analyses of lung specimens of UIP pattern by EPMA-WDS revealed that tungsten and tantalum were distributed in periarteriolar area (Fig 4, D, E) and in subpleural fibrosis with dense acellular collagen (Fig 4 G, H, J, K). However, these elements were not accompanied by centrilobular inflammation/fibrosis (Fig 4, A, B). Lung histopathology in one case showed apical cap-like fibrosis with tungsten deposits detected in the fibrotic region but without GIP.[14] In total, elemental analysis by EPMA-WDS detected tungsten but no cobalt or tantalum in 10 patients, tungsten and cobalt in 5 patients, and tungsten and tantalum in 4 patients (Table 4).

**Table 4. Pathological findings and elemental analysis of patients with hard metal lung disease**

| Patient | sampling method | pathological findings               | elements detected |    |    |
|---------|-----------------|-------------------------------------|-------------------|----|----|
|         |                 |                                     | W                 | Co | Ta |
| 1       | VATS            | centrilobular inflammation/fibrosis | +                 | -  | -  |
| 2       | VATS            | GIP                                 | +                 | -  | -  |
| 3       | TBB, VATS       | GIP                                 | +                 | -  | -  |
| 4       | VATS            | centrilobular inflammation/fibrosis | +                 | -  | -  |
| 5       | VATS            | GIP                                 | +                 | -  | -  |
| 6       | Autopsy         | GIP, DAD                            | +                 | -  | -  |
| 7       | VATS            | centrilobular inflammation/fibrosis | +                 | +  | -  |
| 8       | VATS            | GIP                                 | +                 | -  | +  |
| 9       | VATS            | GIP                                 | +                 | +  | -  |
| 10      | VATS            | UIP                                 | +                 | -  | +  |
| 11      | VATS            | GIP                                 | +                 | +  | -  |
| 12      | Autopsy         | GIP, DAD                            | +                 | -  | -  |
| 13      | VATS            | GIP                                 | +                 | -  | -  |
| 14      | VATS            | GIP, UIP/NSIP?                      | +                 | -  | +  |
| 15      | VATS            | GIP                                 | +                 | +  | -  |
| 16      | VATS, Autopsy   | upper lobe fibrosis                 | +                 | -  | -  |
| 17      | TBB, Lobectomy  | UIP                                 | +                 | -  | -  |
| 18      | VATS            | UIP                                 | +                 | +  | -  |
| 19      | VATS            | UIP, centrilobular fibrosis         | +                 | -  | +  |

Abbreviation; TBB, trans-bronchial biopsy; VATS, video-assisted thoracic surgery; GIP, giant cell interstitial pneumonia; DAD, diffuse alveolar damage; UIP, usual interstitial pneumonia; NSIP, non-specific interstitial pneumonia

### Comparison of clinical features

We then classified the patients with hard metal lung disease into two groups according to their pathological findings. We grouped GIP and centrilobular inflammation/fibrosis together, because the latter pattern was considered to be a variant

of GIP due to the similar distribution of lesions. One patient was pathologically diagnosed as upper lobe fibrosis. It has such characteristic findings of subpleural, zonal, rather well defined fibrosis with small cysts and honeycomb lesions similar to that of UIP pattern that we grouped UIP pattern and upper lobe fibrosis together and named them the fibrosis group. We then compared clinical features between the GIP group and the fibrosis group. The GIP group was younger, had shorter exposure duration, lower serum KL-6, and higher lymphocyte percentage in BAL fluid compared with the fibrosis group (Table 5).

**Table 5. Comparison of clinical features between GIP group and fibrosis group**

|                                         | GIP group<br>(n=14) | Fibrosis group<br>(n=5) | p-value |
|-----------------------------------------|---------------------|-------------------------|---------|
| Age (yrs)                               | 43.1 ± 10.8         | 58.6 ± 5.41             | 0.0071  |
| Gender (M/F)                            | 7/7                 | 5/0                     | 0.1060  |
| Exposure duration (months)              | 73.0 ± 48.8         | 285.6 ± 140.3           | 0.0072  |
| Pneumothorax (+/-)                      | 6/8                 | 2/3                     | 1.0000  |
| KL-6 (U/ml)                             | 398.7 ± 189.4       | 710.8 ± 297.7           | 0.0233  |
| SP-D (ng/ml)                            | 260.3 ± 257.5       | 161.0 ± 54.75           | 0.9025  |
| PaO <sub>2</sub> (Torr)                 | 84.3 ± 14.3         | 84.4 ± 11.2             | 0.9215  |
| PaCO <sub>2</sub> (Torr)                | 42.8 ± 2.75         | 56.0 ± 34.6             | 0.6572  |
| %VC (%)                                 | 64.4 ± 27.1         | 65.5 ± 24.1             | 0.7340  |
| FEV <sub>1</sub> % (%)                  | 85.4 ± 12.9         | 86.1 ± 2.62             | 0.9097  |
| %DLco (%)                               | 50.8 ± 16.7         | 57.2 ± 18.8             | 0.3709  |
| Bronchoalveolar lavage                  |                     |                         |         |
| Total cell count (×10 <sup>5</sup> /ml) | 3.52 ± 2.41         | 2.26 ± 0.96             | 0.3952  |
| Lymphocytes (%)                         | 31.5 ± 23.0         | 8.40 ± 9.08             | 0.0148  |
| CD4/8 ratio                             | 0.76 ± 0.51         | 3.22 ± 4.85             | 0.2975  |

## DISCUSSION

Pathological features of GIP are interstitial pneumonia with centrilobular fibrosis with multinucleated giant cells in the airspaces.[15] Sometimes centrilobular inflammation/fibrosis is only noted with few giant cells. EPMA-WDS analysis of lung tissue of hard metal lung disease demonstrated that tungsten was distributed in a relatively high concentration almost throughout the centrilobular fibrosis and in giant cells.[7] Comparison of distribution of inflammatory cells and tungsten suggested that inhaled hard metal elements were associated with centrilobular inflammation/fibrosis by CD163<sup>+</sup> macrophages in cooperation with CD8<sup>+</sup> lymphocytes. Thus, centrilobular inflammation/fibrosis without giant cells should also be a variant of hard metal lung disease. GIP was also found in Belgian diamond polishers exposed not to hard metal dust, but to cobalt-containing dust, which confirmed that cobalt plays a dominant role in hard metal lung disease.[16] Cobalt is a well-known skin sensitizer, causing allergic contact dermatitis, and it can also cause occupational asthma.[17] Four patients were positive for patch testing for cobalt. Although such patch testing has been claimed to carry some risk of aggravation of disease in the situation with beryllium, cobalt is included in the routine metal allergy test panel and caused no worsening of hard metal lung disease suggesting allergic inflammation should be different between hard metal lung disease and berylliosis.

Respiratory symptoms of hard metal lung diseases sometimes improve on holidays and exacerbate during workdays, which resemble those of hypersensitivity pneumonitis. Histopathology findings in hypersensitivity pneumonitis may also include centrilobular

1  
2  
3  
4  
5  
6 fibrosis in association with isolated giant cells.[18] However, they do not show  
7  
8 cannibalism as those in hard metal lung disease. BAL is the most sensitive tool to  
9  
10 detect hypersensitivity pneumonitis: a marked lymphocytosis with decreased CD4/8  
11  
12 ratio is characteristic of BAL findings.[19] BAL findings of patients with hard metal  
13  
14 lung disease show increased total cell counts with increased lymphocytes and decreased  
15  
16 CD4/CD8 ratio.[4, 20-22] Reduced CD4/8 ratio is consistent with the findings of  
17  
18 immunohistochemistry in the previous study.[7] In this study, we found that  
19  
20 lymphocyte percentage in BAL fluid was increased with rather low CD4/8 ratio in the  
21  
22 GIP group, but they were not recognized in fibrosis group.  
23  
24  
25  
26

27  
28 UIP pattern is the pathological abnormality essential to the diagnosis of idiopathic  
29  
30 pulmonary fibrosis (IPF). Interstitial inflammation and fibrosis in UIP pattern does not  
31  
32 usually involve centrilobular area and peribronchioles. Three cases who were  
33  
34 pathologically diagnosed as UIP pattern also had centrilobular micronodular opacities  
35  
36 in HRCT findings. One patient was pathologically diagnosed as UIP pattern and  
37  
38 centrilobular fibrosis. Elemental analysis by EPMA-WDS of lung specimens of UIP  
39  
40 pattern demonstrated that tungsten accumulated in periarteriolar area and subpleural  
41  
42 fibrosis. However, tungsten in periarteriolar area was hardly associated with any  
43  
44 fibrosis or inflammatory cells. These results suggest that inhaled hard metal elements  
45  
46 in UIP pattern may not trigger as much inflammation as in GIP. Patients develop hard  
47  
48 metal lung disease usually after mean exposure duration of more than 10 years.  
49  
50 Although most studies have found no relation between disease occurrence and length of  
51  
52 occupational exposure, individuals with increased susceptibility may develop hard  
53  
54  
55  
56  
57  
58  
59  
60



1  
2  
3  
4  
5  
6 metal lung disease after relatively short and low levels of exposure. The GIP group  
7  
8 was younger and had shorter exposure duration suggesting that those who had UIP  
9  
10 pattern were individuals with decreased susceptibility. Upper lobe fibrosis was  
11  
12 pathologically diagnosed in one patient. Although it is significantly different from UIP  
13  
14 pattern, tungsten in the fibrosis was not associated with inflammation around the  
15  
16 element, either. With regard to the relationship between hard metal elements and  
17  
18 surrounding inflammation, upper lobe fibrosis looks similar to UIP pattern in the other  
19  
20 cases.  
21  
22  
23  
24

25 Liebow first described GIP as a form of idiopathic interstitial pneumonia.[23] It is  
26  
27 now recognized that GIP is pathognomonic for hard metal lung disease.[24] Since  
28  
29 tungsten and cobalt are only observed within the lungs of subjects who have been  
30  
31 exposed to hard metals, the presence of tungsten and/or cobalt in BAL fluid or lung  
32  
33 specimens leads to a definite diagnosis of hard metal lung disease. According to the  
34  
35 results of elemental analyses in this study, five cases with UIP pattern or upper lobe  
36  
37 fibrosis should be diagnosed as hard metal lung disease. However, the pathological  
38  
39 findings of UIP pattern demonstrated no microscopic connection between centrilobular  
40  
41 fibrosis and the UIP area, dense fibrosis with fibroblastic foci. EPMA-WDS analyses  
42  
43 of lung specimens of UIP pattern revealed that tungsten and tantalum in periarteriolar  
44  
45 area were not accompanied by centrilobular inflammation/fibrosis as seen in typical GIP.  
46  
47 In addition, clinical features of the fibrosis group were different from those of the GIP  
48  
49 group. We identified tungsten in subpleural fibrosis with dense acellular collagen from  
50  
51 UIP pattern and in the fibrotic region from apical cap-like fibrosis. Fibrotic reactions  
52  
53  
54  
55  
56  
57  
58  
59  
60

1  
2  
3  
4  
5  
6 of these patients could have caused accumulation of hard metal particles as the scars  
7  
8 contract and cut off lymphatic drainage. Those who are not sensitive to hard metal  
9  
10 elements, particularly cobalt, might simply have idiopathic UIP or upper lobe fibrosis  
11  
12 by accident as everyone with interstitial lung disease and a history of asbestos exposure  
13  
14 does not have asbestosis.[25] However, microscopic findings of the lung specimen of  
15  
16 UIP pattern included mild centrilobular inflammation and multinucleated giant cells  
17  
18 with cannibalism, which could never been seen in idiopathic UIP/IPF. If we knew the  
19  
20 relative frequencies of incidence of the two diseases, hard metal lung disease and IPF,  
21  
22 the likelihood of someone with hard metal exposure developing idiopathic UIP/IPF  
23  
24 could be inferred.  
25  
26  
27  
28  
29

30 Hard metal lung disease is caused by exposure to cobalt and tungsten carbide.  
31  
32 Toxicity stems from reactive oxygen species generation in a mechanism involving both  
33  
34 elements in mutual contact.[26] Inhaled cobalt and tungsten carbides may cause lung  
35  
36 toxicity even in those who are less sensitive to those elements, which can result in lung  
37  
38 fibrosis with GIP features. Qualitative elemental analysis of fibrosing lesion in GIP  
39  
40 also demonstrated the presence of miscellaneous elements: Al, Si, Ti, Cr, and Fe, in  
41  
42 addition to tungsten, cobalt, and/or Ta.[7] Several sources of evidence suggest that  
43  
44 environmental agents may have an etiologic role in IPF. A meta-analysis of six  
45  
46 case-control studies demonstrated that six exposures including cigarette smoking,  
47  
48 agriculture/farming, livestock, wood dust, metal dust, and stone/sand were significantly  
49  
50 associated with IPF.[27] Metal dust must contain various metal elements. In an  
51  
52 EPMA analysis field of the lung biopsy specimen from upper lobe fibrosis, we found  
53  
54  
55  
56  
57  
58  
59  
60

1  
2  
3  
4  
5 tungsten scattered throughout the fibrosis as well as aluminum, silicon, and  
6  
7  
8 titanium.[14] Miscellaneous metal dust inhaled in addition to tungsten and cobalt may  
9  
10  
11 cause UIP pattern in less sensitive individuals.  
12  
13  
14  
15  
16  
17  
18  
19  
20  
21  
22  
23  
24  
25  
26  
27  
28  
29  
30  
31  
32  
33  
34  
35  
36  
37  
38  
39  
40  
41  
42  
43  
44  
45  
46  
47  
48  
49  
50  
51  
52  
53  
54  
55  
56  
57  
58  
59  
60

For peer review only

## Acknowledgement

The authors thank the following doctors for the supply of cases: Dr. T. Endo from Nagaoka Chuo General Hospital, Dr. M. Amano and Dr. S. Aoki from Showa General Hospital, Dr. T. Ishiguro from Gifu Municipal Hospital, Dr. M. Sakai from Saga Social Insurance Hospital, Dr. M. Tajiri from Kurume University, Dr T. Ishida from Niigata Prefectural Central Hospital, Dr. K. Koreeda from Minami Kyusyu National Hospital, Dr. K. Okuno from Kasai City Hospital, Dr. Y. Shimaoka from Nagaoka Red Cross Hospital, Dr. K. Kashiwada from Nippon Medical School, Dr. T. Sawada and Dr. A. Shiihara from Kanagawa Cardiovascular and Respiratory Center, Dr. K. Tachibana from National Hospital Organization Kinki-chuo Chest Medical Center, Dr. T. Azuma from Shinshu University, Dr. K. Hara and Dr. T. Ishihara from NTT east corporation Kanto Medical Center, Dr. Y. Waseda from Kanazawa University, Dr. H. Ishii from Oita University, Dr. H. Matsuoka from Osaka Prefectural Medical Center for Respiratory and Allergic Diseases, Dr. A Hara from Nagasaki University, Dr. O. Hisata from Tohoku University, and Dr. H. Tokuda from Social Insurance Chuo General Hospital. The authors also would like to acknowledge Dr. Kouichi Watanabe and Mr. Masayoshi Kobayashi of EPMA Laboratory, Center of Instrumental Analysis, Niigata University, who contributed to elemental analysis of lung specimens.

## Statements

a. contributorship,

JT and HM, elemental analysis; ES, IN, and TY, interpretation of the results; MT,

ES, YK, AH, pathological study; JT and TT, manuscript preparation; and FS and

1  
2  
3  
4  
5  
6 HA, radiological examination.  
7

8 b. funding,  
9

10 This research received no specific funding.  
11  
12

13 c. ethics,  
14

15 We acquired consent from all treating physicians for each identified case according  
16 to the Guidelines for Epidemiological Studies from The Ministry of Health, Labor  
17 and Welfare. The Committee of Ethics, Niigata University, approved the  
18 EPMA-WDS study protocol (#396).  
19  
20  
21  
22  
23

24 d. data sharing,  
25  
26

27 There are no data shared in the study.  
28  
29  
30  
31  
32  
33  
34  
35  
36  
37  
38  
39  
40  
41  
42  
43  
44  
45  
46  
47  
48  
49  
50  
51  
52  
53  
54  
55  
56  
57  
58  
59  
60

## References

1. Nemery B. Metal toxicity and the respiratory tract. *Eur Respir J*. 1990;**3**:202-19.
2. Kelleher P, Pacheco K, Newman LS. Inorganic dust pneumonias: the metal-related parenchymal disorders. *Environmental health perspectives*. 2000;**108 Suppl 4**:685-96.
3. Takada T, Moriyama H. Hard Metal Lung Disease. In: Huang Y-CT, Ghio AJ, Maier LA, editors. *A Clinical Guide to Occupational and Environmental Lung Diseases Respiratory Medicine*. New York: Springer; 2012. p. 217-30.
4. Davison AG, Haslam PL, Corrin B et al. Interstitial lung disease and asthma in hard-metal workers: bronchoalveolar lavage, ultrastructural, and analytical findings and results of bronchial provocation tests. *Thorax*. 1983;**38**:119-28.
5. Cugell DW. The hard metal diseases. *Clin Chest Med*. 1992;**13**:269-79.
6. Anttila S, Sutinen S, Paananen M et al. Hard metal lung disease: a clinical, histological, ultrastructural and X-ray microanalytical study. *Eur J Respir Dis*. 1986;**69**:83-94.
7. Moriyama H, Kobayashi M, Takada T et al. Two-dimensional analysis of elements and mononuclear cells in hard metal lung disease. *Am J Respir Crit Care Med*. 2007;**176**:70-7.
8. Ohori NP, Sciruba FC, Owens GR et al. Giant-cell interstitial pneumonia and hard-metal pneumoconiosis. A clinicopathologic study of four cases and review of the literature. *Am J Surg Pathol*. 1989;**13**:581-7.
9. Travis WD, Matsui K, Moss J et al. Idiopathic nonspecific interstitial pneumonia: prognostic significance of cellular and fibrosing patterns: survival comparison with

1  
2  
3  
4  
5  
6 usual interstitial pneumonia and desquamative interstitial pneumonia. *Am J Surg Pathol*.

7  
8 2000;**24**:19-33.

9  
10 10. Katzenstein AL, Myers JL. Idiopathic pulmonary fibrosis: clinical relevance of  
11 pathologic classification. *Am J Respir Crit Care Med*. 1998;**157**:1301-15.

12  
13 11. Moriyama H, Yamamoto T, Takatsuka H et al. Expression of macrophage  
14 colony-stimulating factor and its receptor in hepatic granulomas of  
15 Kupffer-cell-depleted mice. *Am J Pathol*. 1997;**150**:2047-60.

16  
17 12. American Thoracic Society. Idiopathic pulmonary fibrosis: diagnosis and treatment.  
18 International consensus statement. American Thoracic Society (ATS), and the European  
19 Respiratory Society (ERS). *Am J Respir Crit Care Med*. 2000;**161**:646-64.

20  
21 13. Shiota S, Shimizu K, Suzuki M et al. [Seven cases of marked pulmonary fibrosis in  
22 the upper lobe]. *Nihon Kokyuki Gakkai Zasshi*. 1999;**37**:87-96.

23  
24 14. Kaneko Y, Kikuchi N, Ishii Y et al. Upper lobe-dominant pulmonary fibrosis  
25 showing deposits of hard metal component in the fibrotic lesions. *Intern Med*.  
26 2010;**49**:2143-5.

27  
28 15. Naqvi AH, Hunt A, Burnett BR et al. Pathologic spectrum and lung dust burden in  
29 giant cell interstitial pneumonia (hard metal disease/cobalt pneumonitis): review of 100  
30 cases. *Arch Environ Occup Health*. 2008;**63**:51-70.

31  
32 16. Demedts M, Gheysens B, Nagels J et al. Cobalt lung in diamond polishers. *The*  
33  
34  
35  
36  
37  
38  
39  
40  
41  
42  
43  
44  
45  
46  
47  
48  
49  
50  
51  
52  
53  
54  
55  
56  
57  
58  
59  
60  
*American review of respiratory disease*. 1984;**130**:130-5.

17. Nemery B, Verbeken EK, Demedts M. Giant cell interstitial pneumonia (hard metal  
lung disease, cobalt lung). *Semin Respir Crit Care Med*. 2001;**22**:435-48.

- 1  
2  
3  
4  
5  
6 18. Churg A, Muller NL, Flint J et al. Chronic hypersensitivity pneumonitis. *Am J Surg*  
7  
8 *Pathol.* 2006;**30**:201-8.  
9
- 10 19. D'Ippolito R, Chetta A, Foresi A et al. Induced sputum and bronchoalveolar lavage  
11  
12 from patients with hypersensitivity pneumonitis. *Respir Med.* 2004;**98**:977-83.  
13
- 14 20. Okuno K, Kobayashi K, Kotani Y et al. A case of hard metal lung disease  
15  
16 resembling a hypersensitive pneumonia in radiological images. *Intern Med.*  
17  
18 2010;**49**:1185-9.  
19
- 20 21. Kakugawa T, Mukae H, Nagata T et al. Giant cell interstitial pneumonia in a  
21  
22 15-year-old boy. *Intern Med.* 2002;**41**:1007-12.  
23
- 24 22. Forni A. Bronchoalveolar lavage in the diagnosis of hard metal disease. *Sci Total*  
25  
26 *Environ.* 1994;**150**:69-76.  
27
- 28 23. Liebow AA. Definition and classification of interstitial pneumonias in human  
29  
30 pathology. *Prog Respir Res.* 1975:1-33.  
31
- 32 24. Abraham JL, Burnett BR, Hunt A. Development and use of a pneumoconiosis  
33  
34 database of human pulmonary inorganic particulate burden in over 400 lungs. *Scanning*  
35  
36 *Microsc.* 1991;**5**:95-104; discussion 5-8.  
37
- 38 25. Gaensler EA, Jederlinic PJ, Churg A. Idiopathic pulmonary fibrosis in  
39  
40 asbestos-exposed workers. *The American review of respiratory disease.*  
41  
42 1991;**144**:689-96.  
43
- 44 26. Fubini B. Surface reactivity in the pathogenic response to particulates.  
45  
46 *Environmental health perspectives.* 1997;**105 Suppl 5**:1013-20.  
47
- 48 27. Taskar VS, Coultas DB. Is idiopathic pulmonary fibrosis an environmental disease?  
49  
50  
51  
52  
53  
54  
55  
56  
57  
58  
59  
60



1  
2  
3  
4  
5  
6 *Proc Am Thorac Soc.* 2006;3:293-8.  
7  
8  
9  
10  
11  
12  
13  
14  
15  
16  
17  
18  
19  
20  
21  
22  
23  
24  
25  
26  
27  
28  
29  
30  
31  
32  
33  
34  
35  
36  
37  
38  
39  
40  
41  
42  
43  
44  
45  
46  
47  
48  
49  
50  
51  
52  
53  
54  
55  
56  
57  
58  
59  
60

For peer review only

**FIGURE LEGENDS****Figure 1**

High-resolution computed tomography of the chest illustrating differences in the radiographic appearance of the lungs in giant cell interstitial pneumonia (GIP) and in usual interstitial pneumonia (UIP) pattern. (A, B) In GIP of case 9, centrilobular micronodular opacities pathologically correspond to centrilobular fibrosis and giant cell accumulation within the alveolar space. (C, D) In UIP pattern of case 10, reticular opacities and traction bronchiectasis are present with centrilobular micronodular opacities.

**Figure 2**

Representative images of light microscopic findings and electron probe microanalyser with wavelength dispersive spectrometer (EPMA-WDS) of S6 specimen from case 9 pathologically diagnosed as giant cell interstitial pneumonia. (A, B, and C) The black square area in centrilobular fibrosis is stepwise magnified to show multinucleated giant cells with cannibalism. (A, D) The green square area in subpleural zone is elementally analyzed by EPMA-WDS to show (E) many orange spots corresponding to tungsten. A qualitative colored image of tungsten distribution is superimposed onto a lung tissue image of amino nitrogen colored green. Note that tungsten is widely distributed in centrilobular fibrosis as well as surrounding alveolar walls. Original magnification, (A) panoramic view, (B) x 4, (C) x 60, and (D) x 8.

**Figure 3**

Representative images of light microscopic findings of lung specimen from case 10 with hard metal lung disease pathologically diagnosed as usual interstitial pneumonia pattern. (A, B) A low magnification view of left S1+2 specimen demonstrates a combination of patchy interstitial fibrosis with alternating areas of normal lung and architectural alteration due to chronic scarring or honeycomb change. Note that there are several small bronchioles with mild centrilobular inflammation (blue arrows). (B, C) Multinucleated giant cells with cannibalism are also shown in a stepwise-magnified black square area located in subpleural fibrosis. (D, E, F) Left S10 specimen from the same patient also shows characteristic fibroblastic foci (black arrows) in the background of dense acellular collagen in a stepwise-magnified square area located in subpleural fibrosis. Original magnification, (A, D) panoramic view, (B) x 2, (C) x 40, (E) x 4 and (F) x 20.

**Figure 4**

Representative images of light micrographs and electron probe microanalyser with wavelength dispersive spectrometer (EPMA-WDS) of lung specimen from case 10 with hard metal lung disease pathologically diagnosed as usual interstitial pneumonia pattern (A). (B, C) An arteriole and its surrounding interstitium (orange square) are elementally analyzed by EPMA-WDS to demonstrate that (D) tungsten and (E) tantalum are distributed in periarteriolar area with little fibrosis. Elemental analysis by EPMA-WDS of subpleural fibrosis with dense acellular collagen (green square in B, F,

1  
2  
3  
4  
5  
6 I) also shows (G, J) tungsten and (H, K) tantalum almost randomly distributed in  
7  
8 magnified images (yellow squares in G and H are magnified to show (J) tungsten and  
9  
10 (K) tantalum). Note that the distribution of tungsten is not completely the same as that  
11  
12 of tantalum. Original magnification, (A) panoramic view and (B) x 4.  
13  
14  
15  
16  
17  
18  
19  
20  
21  
22  
23  
24  
25  
26  
27  
28  
29  
30  
31  
32  
33  
34  
35  
36  
37  
38  
39  
40  
41  
42  
43  
44  
45  
46  
47  
48  
49  
50  
51  
52  
53  
54  
55  
56  
57  
58  
59  
60

For peer review only

1  
2  
3  
4  
5  
6  
7  
8  
9  
10  
11  
12  
13  
14  
15  
16  
17  
18  
19  
20  
21  
22  
23  
24  
25  
26  
27  
28  
29  
30  
31  
32  
33  
34  
35  
36  
37  
38  
39  
40  
41  
42  
43  
44  
45  
46  
47  
48  
49  
50  
51  
52  
53  
54  
55  
56  
57  
58  
59  
60

Fig 1

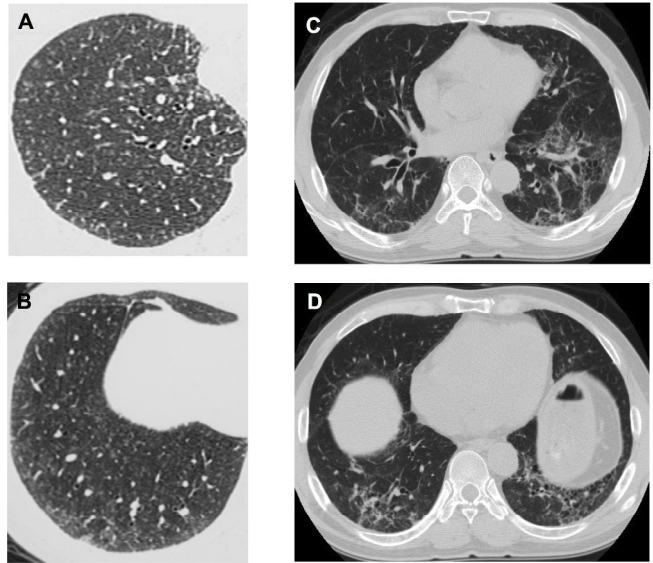

297x209mm (300 x 300 DPI)

view only

1  
2  
3  
4  
5  
6  
7  
8  
9  
10  
11  
12  
13  
14  
15  
16  
17  
18  
19  
20  
21  
22  
23  
24  
25  
26  
27  
28  
29  
30  
31  
32  
33  
34  
35  
36  
37  
38  
39  
40  
41  
42  
43  
44  
45  
46  
47  
48  
49  
50  
51  
52  
53  
54  
55  
56  
57  
58  
59  
60

Fig 2

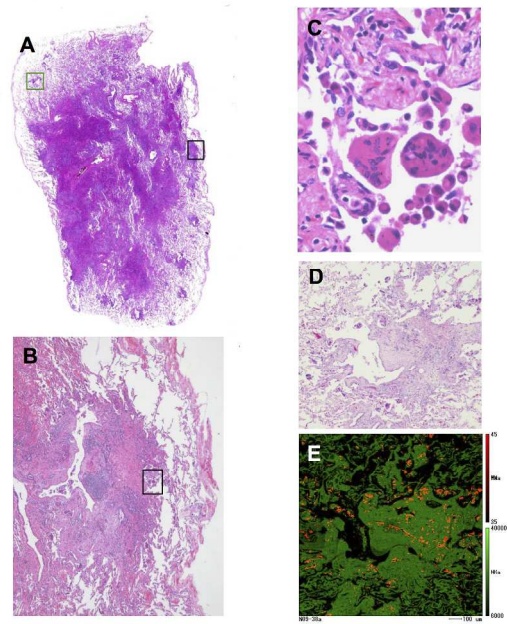

297x209mm (300 x 300 DPI)

view only

1  
2  
3  
4  
5  
6  
7  
8  
9  
10  
11  
12  
13  
14  
15  
16  
17  
18  
19  
20  
21  
22  
23  
24  
25  
26  
27  
28  
29  
30  
31  
32  
33  
34  
35  
36  
37  
38  
39  
40  
41  
42  
43  
44  
45  
46  
47  
48  
49  
50  
51  
52  
53  
54  
55  
56  
57  
58  
59  
60

Fig 3

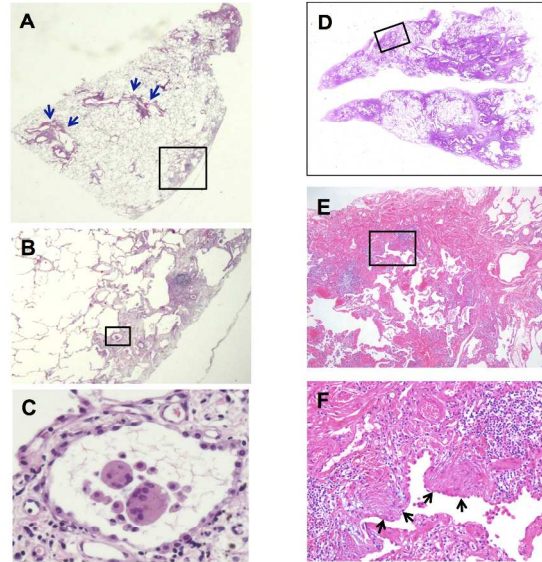

297x209mm (300 x 300 DPI)

view only

1  
2  
3  
4  
5  
6  
7  
8  
9  
10  
11  
12  
13  
14  
15  
16  
17  
18  
19  
20  
21  
22  
23  
24  
25  
26  
27  
28  
29  
30  
31  
32  
33  
34  
35  
36  
37  
38  
39  
40  
41  
42  
43  
44  
45  
46  
47  
48  
49  
50  
51  
52  
53  
54  
55  
56  
57  
58  
59  
60

Fig 4

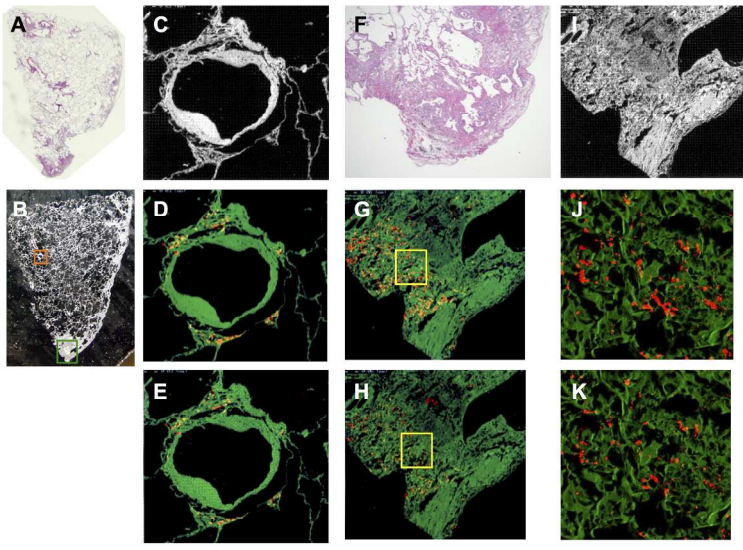

297x209mm (300 x 300 DPI)

view only



## STROBE Statement—checklist of items that should be included in reports of observational studies

|                                        | Item No | Recommendation                                                                                                                                                                                                                                                                                                                                                                                                                                                                                                                                                                                                                                                                                   |
|----------------------------------------|---------|--------------------------------------------------------------------------------------------------------------------------------------------------------------------------------------------------------------------------------------------------------------------------------------------------------------------------------------------------------------------------------------------------------------------------------------------------------------------------------------------------------------------------------------------------------------------------------------------------------------------------------------------------------------------------------------------------|
| <b>Title and abstract</b><br>p. 1, 3-4 | 1       | (a) Indicate the study's design with a commonly used term in the title or the abstract<br>(b) Provide in the abstract an informative and balanced summary of what was done and what was found                                                                                                                                                                                                                                                                                                                                                                                                                                                                                                    |
| <b>Introduction</b>                    |         |                                                                                                                                                                                                                                                                                                                                                                                                                                                                                                                                                                                                                                                                                                  |
| Background/rationale<br>p. 5           | 2       | Explain the scientific background and rationale for the investigation being reported                                                                                                                                                                                                                                                                                                                                                                                                                                                                                                                                                                                                             |
| Objectives, p. 5                       | 3       | State specific objectives, including any prespecified hypotheses                                                                                                                                                                                                                                                                                                                                                                                                                                                                                                                                                                                                                                 |
| <b>Methods</b>                         |         |                                                                                                                                                                                                                                                                                                                                                                                                                                                                                                                                                                                                                                                                                                  |
| Study design, p.6                      | 4       | Present key elements of study design early in the paper                                                                                                                                                                                                                                                                                                                                                                                                                                                                                                                                                                                                                                          |
| Setting, p.6                           | 5       | Describe the setting, locations, and relevant dates, including periods of recruitment, exposure, follow-up, and data collection                                                                                                                                                                                                                                                                                                                                                                                                                                                                                                                                                                  |
| Participants, p.6                      | 6       | (a) <i>Cohort study</i> —Give the eligibility criteria, and the sources and methods of selection of participants. Describe methods of follow-up<br><i>Case-control study</i> —Give the eligibility criteria, and the sources and methods of case ascertainment and control selection. Give the rationale for the choice of cases and controls<br><i>Cross-sectional study</i> —Give the eligibility criteria, and the sources and methods of selection of participants<br>(b) <i>Cohort study</i> —For matched studies, give matching criteria and number of exposed and unexposed<br><i>Case-control study</i> —For matched studies, give matching criteria and the number of controls per case |
| Variables, p.6                         | 7       | Clearly define all outcomes, exposures, predictors, potential confounders, and effect modifiers. Give diagnostic criteria, if applicable                                                                                                                                                                                                                                                                                                                                                                                                                                                                                                                                                         |
| Data sources/<br>measurement,<br>p.6-8 | 8*      | For each variable of interest, give sources of data and details of methods of assessment (measurement). Describe comparability of assessment methods if there is more than one group                                                                                                                                                                                                                                                                                                                                                                                                                                                                                                             |
| Bias, p.6                              | 9       | Describe any efforts to address potential sources of bias                                                                                                                                                                                                                                                                                                                                                                                                                                                                                                                                                                                                                                        |
| Study size, p. 8, 9                    | 10      | Explain how the study size was arrived at                                                                                                                                                                                                                                                                                                                                                                                                                                                                                                                                                                                                                                                        |
| Quantitative variables,<br>p. 18       | 11      | Explain how quantitative variables were handled in the analyses. If applicable, describe which groupings were chosen and why                                                                                                                                                                                                                                                                                                                                                                                                                                                                                                                                                                     |
| Statistical methods, p. 8              | 12      | (a) Describe all statistical methods, including those used to control for confounding<br>(b) Describe any methods used to examine subgroups and interactions<br>(c) Explain how missing data were addressed<br>(d) <i>Cohort study</i> —If applicable, explain how loss to follow-up was addressed<br><i>Case-control study</i> —If applicable, explain how matching of cases and controls was addressed<br><i>Cross-sectional study</i> —If applicable, describe analytical methods taking account of sampling strategy<br>(e) Describe any sensitivity analyses                                                                                                                                |

Continued on next page

**Results**

|                            |     |                                                                                                                                                                                                                                                                                                                                                                                                               |
|----------------------------|-----|---------------------------------------------------------------------------------------------------------------------------------------------------------------------------------------------------------------------------------------------------------------------------------------------------------------------------------------------------------------------------------------------------------------|
| Participants,<br>p. 8, 9   | 13* | (a) Report numbers of individuals at each stage of study—eg numbers potentially eligible, examined for eligibility, confirmed eligible, included in the study, completing follow-up, and analysed<br>(b) Give reasons for non-participation at each stage<br>(c) Consider use of a flow diagram                                                                                                               |
| Descriptive data,<br>p. 10 | 14* | (a) Give characteristics of study participants (eg demographic, clinical, social) and information on exposures and potential confounders<br>(b) Indicate number of participants with missing data for each variable of interest<br>(c) <i>Cohort study</i> —Summarise follow-up time (eg, average and total amount)                                                                                           |
| Outcome data,<br>p. 12     | 15* | <i>Cohort study</i> —Report numbers of outcome events or summary measures over time<br><i>Case-control study</i> —Report numbers in each exposure category, or summary measures of exposure<br><i>Cross-sectional study</i> —Report numbers of outcome events or summary measures                                                                                                                             |
| Main results,<br>p. 13, 14 | 16  | (a) Give unadjusted estimates and, if applicable, confounder-adjusted estimates and their precision (eg, 95% confidence interval). Make clear which confounders were adjusted for and why they were included<br>(b) Report category boundaries when continuous variables were categorized<br>(c) If relevant, consider translating estimates of relative risk into absolute risk for a meaningful time period |
| Other analyses,<br>p. 18   | 17  | Report other analyses done—eg analyses of subgroups and interactions, and sensitivity analyses                                                                                                                                                                                                                                                                                                                |

**Discussion**

|                             |    |                                                                                                                                                                            |
|-----------------------------|----|----------------------------------------------------------------------------------------------------------------------------------------------------------------------------|
| Key results, p. 15,<br>16   | 18 | Summarise key results with reference to study objectives                                                                                                                   |
| Limitations, p. 18          | 19 | Discuss limitations of the study, taking into account sources of potential bias or imprecision. Discuss both direction and magnitude of any potential bias                 |
| Interpretation,<br>p.17, 18 | 20 | Give a cautious overall interpretation of results considering objectives, limitations, multiplicity of analyses, results from similar studies, and other relevant evidence |
| Generalisability,<br>p 18   | 21 | Discuss the generalisability (external validity) of the study results                                                                                                      |

**Other information**

|               |    |                                                                                                                                                               |
|---------------|----|---------------------------------------------------------------------------------------------------------------------------------------------------------------|
| Funding<br>NA | 22 | Give the source of funding and the role of the funders for the present study and, if applicable, for the original study on which the present article is based |
|---------------|----|---------------------------------------------------------------------------------------------------------------------------------------------------------------|

\*Give information separately for cases and controls in case-control studies and, if applicable, for exposed and unexposed groups in cohort and cross-sectional studies.

**Note:** An Explanation and Elaboration article discusses each checklist item and gives methodological background and published examples of transparent reporting. The STROBE checklist is best used in conjunction with this article (freely available on the Web sites of PLoS Medicine at <http://www.plosmedicine.org/>, Annals of Internal Medicine at <http://www.annals.org/>, and Epidemiology at <http://www.epidem.com/>). Information on the STROBE Initiative is available at [www.strobe-statement.org](http://www.strobe-statement.org).

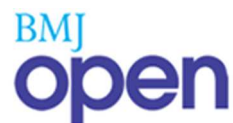

## Giant Cell Interstitial Pneumonia and Lung Fibrosis in Hard Metal Lung Disease

|                                 |                                                                                                                                                                                                                                                                                                                                                                                                                                                                                                     |
|---------------------------------|-----------------------------------------------------------------------------------------------------------------------------------------------------------------------------------------------------------------------------------------------------------------------------------------------------------------------------------------------------------------------------------------------------------------------------------------------------------------------------------------------------|
| Journal:                        | <i>BMJ Open</i>                                                                                                                                                                                                                                                                                                                                                                                                                                                                                     |
| Manuscript ID:                  | bmjopen-2013-004407.R1                                                                                                                                                                                                                                                                                                                                                                                                                                                                              |
| Article Type:                   | Research                                                                                                                                                                                                                                                                                                                                                                                                                                                                                            |
| Date Submitted by the Author:   | 30-Jan-2014                                                                                                                                                                                                                                                                                                                                                                                                                                                                                         |
| Complete List of Authors:       | Takada, Toshinori; Niigata University, Division of Respiratory Medicine<br>Tanaka, Junichi; Niigata University, Division of Respiratory Medicine<br>Moriyama, Hiroshi; Niigata University, Division of Respiratory Medicine<br>Terada, Masaki; Niigata University, Division of Respiratory Medicine<br>Suzuki, Eiichi<br>Narita, Ichiei; Niigata University, Division of Respiratory Medicine<br>Kawabata, Yoshinori<br>Yamaguchi, Tetsuo<br>Hebisawa, Akira<br>Sakai, Fumikazu<br>Arakawa, Hiroaki |
| <b>Primary Subject Heading</b>: | Occupational and environmental medicine                                                                                                                                                                                                                                                                                                                                                                                                                                                             |
| Secondary Subject Heading:      | Occupational and environmental medicine                                                                                                                                                                                                                                                                                                                                                                                                                                                             |
| Keywords:                       | OCCUPATIONAL & INDUSTRIAL MEDICINE, Thoracic medicine < INTERNAL MEDICINE, Interstitial lung disease < THORACIC MEDICINE                                                                                                                                                                                                                                                                                                                                                                            |
|                                 |                                                                                                                                                                                                                                                                                                                                                                                                                                                                                                     |

SCHOLARONE™  
Manuscripts

only

1  
2  
3  
4  
5  
6 **An Observational Study of Giant Cell Interstitial Pneumonia and Lung Fibrosis in**  
7  
8 **Hard Metal Lung Disease**  
9

10 <sup>1</sup>Junichi Tanaka, MD, <sup>1</sup>Hiroshi Moriyama, MD, <sup>1</sup>Masaki Terada, MD, <sup>1</sup>Toshinori Takada,  
11 MD, <sup>2</sup>Eiichi Suzuki, MD, <sup>1</sup>Ichiei Narita, MD, <sup>3</sup>Yoshinori Kawabata, MD, <sup>3</sup>Tetsuo  
12 Yamaguchi, MD, <sup>3</sup>Akira Hebisawa, MD, <sup>3</sup>Fumikazu Sakai, MD, and <sup>3</sup>Hiroaki Arakawa,  
13 MD,  
14  
15  
16  
17  
18  
19

20 <sup>1</sup>Division of Respiratory Medicine, Graduate School of Medical and Dental Sciences,  
21 Niigata University, Niigata, Japan, <sup>2</sup>Department of General Medicine, Niigata  
22 University Medical and Dental Hospital, Niigata, Japan, <sup>3</sup>Tokyo Research Group for  
23 Diffuse Parenchymal Lung Diseases, Tokyo, Japan  
24  
25  
26  
27  
28  
29  
30  
31

32 Corresponding author: Toshinori Takada, M.D., PhD  
33

34 Division of Respiratory Medicine, Graduate School of Medical and Dental Sciences,  
35 Niigata University  
36  
37

38 1-757 Asahimachi-dori, Chuo-ku, Niigata, 951-8510, Japan  
39

40 Tel; +81-25-227-2200, Fax; +81-25-227-0775, Email; ttakada@med.niigata-u.ac.jp  
41  
42  
43  
44  
45  
46

47 Keywords: hard metal, pulmonary fibrosis, electron probe microanalysis  
48  
49  
50

51 Word count: 2,910  
52  
53  
54  
55  
56  
57  
58  
59  
60

**Statements**

## a. contributorship,

JT and HM, elemental analysis; ES, IN, and TY, interpretation of the results; MT, ES, YK, AH, pathological study; JT and TT, manuscript preparation; and FS and HA, radiological examination.

## b. funding,

This research received no specific funding.

## c. ethics,

We acquired consent from all treating physicians for each identified case according to the Guidelines for Epidemiological Studies from The Ministry of Health, Labor and Welfare. The Committee of Ethics, Niigata University, approved the EPMA-WDS study protocol (#396).

## d. data sharing,

There are no data shared in the study.

**ABSTRACT**

**Background:** Hard metal lung disease has pathological patterns including giant cell interstitial pneumonia (GIP) and usual interstitial pneumonia (UIP). Although UIP pattern is considered the prominent feature in advanced disease, it is unknown whether GIP finally progresses to UIP pattern.

**Objective:** To clarify clinical, pathological, and elemental differences between GIP and UIP pattern in hard metal lung disease.

**Methods:** We obtained the clinical records, chest CT, and lung tissue from nineteen cases diagnosed as hard metal lung disease. Lung tissue was elementally analyzed by electron probe microanalyser. We classified the patients into two groups according to the pathological findings and statistically compared clinical data.

**Results:** Fourteen cases were pathologically diagnosed as GIP or centrilobular inflammation/fibrosis. The other five cases were UIP pattern or upper lobe fibrosis. Elemental analyses of lung specimens of GIP showed tungsten throughout the centrilobular fibrotic areas. In UIP pattern, tungsten was detected in periarteriolar area and subpleural fibrosis in no association with centrilobular fibrosis or inflammatory cell infiltration. The GIP group was younger (43.1 vs 58.6 yrs) with shorter exposure duration (73 vs 285 months) ( $p<0.01$ ), lower serum KL-6 (398 vs 710 U/ml), and higher lymphocyte percentage in bronchoalveolar lavage fluid (31.5 vs 3.22 %) ( $p<0.05$ ) than the fibrosis group.

**Conclusions** UIP pattern or upper lobe fibrosis is remarkably different from GIP in distribution of hard metal elements, associated interstitial inflammation and fibrosis,

1  
2  
3  
4  
5  
6 and clinical features. In hard metal lung disease, UIP pattern or upper lobe fibrosis  
7  
8 may not be an advanced form of GIP.  
9

### 10 11 12 13 **Strengths and limitations of this study**

14  
15  
16 1, Nineteen cases of hard metal lung disease, a rare occupational lung disease, were  
17  
18 collected and their clinical features were documented.

19  
20  
21 2, Lung tissue from all the patients was elementally analyzed by a patented technique,  
22  
23 an improved element analysis using electron probe microanalyzers with wavelength  
24  
25 dispersive spectrometer.  
26

27  
28 3, Since the relative frequencies of incidence of hard metal lung disease and IPF, the  
29  
30 probability that someone with hard metal exposure will develop idiopathic UIP/IPF  
31  
32 cannot be inferred.  
33  
34  
35  
36  
37  
38  
39  
40  
41  
42  
43  
44  
45  
46  
47  
48  
49  
50  
51  
52  
53  
54  
55  
56  
57  
58  
59  
60

## INTRODUCTION

Hard metal is a synthetic compound that combines tungsten carbide with cobalt. Patients exposed to hard metal may develop occupational asthma, a syndrome resembling hypersensitivity pneumonitis, or interstitial lung disease which is recognized as hard metal lung disease.[1-3] In many cases with hard metal lung disease, multinucleated giant cells with centrilobular fibrosis are prominent resulting in a pattern of giant cell interstitial pneumonia (GIP).[4-6] We demonstrated that hard metal accumulated in the centrilobular area may trigger the inflammation in cooperation with CD163<sup>+</sup> monocyte-macrophages and CD8<sup>+</sup> lymphocytes using electron probe microanalyzers with wavelength dispersive spectrometer (EPMA-WDS).[7] In addition to classical GIP, hard metal lung disease has a variety of pathological patterns, desquamative interstitial pneumonia, obliterative bronchiolitis, and usual interstitial pneumonia (UIP) pattern.[4, 8] The lesions of classical GIP are usually centered on the centrilobular areas. On the other hand, the key histologic features of UIP are predominantly distributed at the periphery of the acinus or lobule.[9, 10] Hard metal lung disease has pathological patterns of both GIP and UIP, and the UIP pattern is thought to be the prominent feature in advanced cases of the disease.[8] The key question is whether UIP pattern is an advanced form of GIP or not. In order to elucidate relationship between GIP and lung fibrosis with detection of hard metal elements, we collected cases with tungsten in lung tissue and reviewed their clinical records. We then elementally reexamined lung specimens by EPMA-WDS. We finally classified the patients into two groups according to the histological findings and



1  
2  
3  
4  
5  
6 statistically compared their clinical features. Pathological and elemental analyses in  
7  
8 the study suggest that UIP pattern or upper lobe fibrosis may be different from an  
9  
10 end-stage form of GIP.  
11

## 12 13 14 15 **METHODS**

### 16 17 **Patient population**

18  
19 We collected patients by announcing inquiry for cases of hard metal lung disease to the  
20  
21 major medical institutes and hospitals all over Japan for the 10th annual meeting of the  
22  
23 Tokyo Research Group for Diffuse Parenchymal Lung Diseases. We obtained  
24  
25 information of patient profile such as age, gender, duration of hard metal exposure,  
26  
27 history of pneumothorax, history of allergy, symptoms, physical findings, serum levels  
28  
29 of Krebs von den Lungen-6 (KL-6) and SP-D, arterial blood gas data, pulmonary  
30  
31 function tests, bronchoalveolar lavage (BAL) cell profiles and treatment and prognosis  
32  
33 in order to make a data base. We acquired consent from all treating physicians for  
34  
35 each identified case according to the Guidelines for Epidemiological Studies from The  
36  
37 Ministry of Health, Labor and Welfare. The Committee of Ethics, Niigata University,  
38  
39 approved the EPMA-WDS study protocol (#396).  
40  
41  
42  
43  
44  
45  
46  
47  
48

### 49 **HRCT scan findings**

50  
51 All patients with hard metal lung disease except one had undergone high-resolution  
52  
53 computed tomography (HRCT) scanning. Two radiologists (observers) who were  
54  
55 blinded to clinical, laboratory, or pulmonary function test results evaluated CT scan  
56  
57  
58  
59  
60

1  
2  
3  
4  
5  
6 findings. The observers judged each CT scan for the presence or absence of three  
7  
8 main features of centrilobular nodules, ground glass opacity, and pneumothorax. They  
9  
10 also noted other remarkable findings; traction bronchiectasis, reticular pattern,  
11  
12 subpleural linear opacity, consolidation, bulla, centrilobular emphysema, atelectasis, and  
13  
14 bronchial wall thickening and entered these results into a data sheet independently.  
15  
16 After evaluation, disagreement on the results between the observers for some HRCT  
17  
18 scans was resolved by discussion and consensus.  
19  
20  
21  
22  
23  
24

### 25 **Sample preparation and pathological study**

26  
27 Each tissue sample was serially cut into 3 µm-thickness sections and subjected to  
28  
29 pathological study and EPMA-WDS analysis. For pathological study, formalin-fixed 3  
30  
31 µm serial sections were stained with hematoxylin-eosine and Elastica van Gieson  
32  
33 method. Two pathologists (observers), who were blinded to clinical, laboratory, or  
34  
35 pulmonary function test results, evaluated pathological findings. After evaluation,  
36  
37 disagreement on the pathological diagnoses between the observers for some specimens  
38  
39 was resolved by discussion and consensus.  
40  
41  
42  
43  
44  
45  
46

### 47 **Electron probe microanalysis**

48  
49 Examination of tissue sections with EMPA-WDS was performed according to  
50  
51 procedures previously described.[11] X-ray data were

52  
53 obtained with an EPMA-WDS (EPMA 8705, EPMA-1610, Shimadzu Ltd, Kyoto,  
54  
55 Japan). In order to have representative element maps, we at first microscopically  
56  
57  
58  
59  
60

1  
2  
3  
4  
5  
6 scanned tissue specimens and looked for lesions of centrilobular fibrosis with low  
7  
8 magnification because hard metal related elements, tungsten/cobalt were always found  
9  
10 around centrilobular areas according to our experiences. For EMPA analysis, we at  
11  
12 first screened areas of about 1.5 mm x 1.5 mm at largest covering centrilobular lesions  
13  
14 or fibrosing lesion of interstitial lung diseases observed by pathological study to make  
15  
16 rough element maps. Then we focused into areas from 5x5 to 10x10  $\mu\text{m}$  at smallest to  
17  
18 draw fine maps for elements. Each pixel in the focused areas in the tissue was scanned  
19  
20 by three wavelength dispersive crystals; RAP, PET, and LiF for screening elements of  
21  
22 Al, K, RAP; Si, K, PET; Ti, K, LiF; Cr, K, LiF; Fe, K, LiF; Co, K, LiF; Ta, M, PET; W,  
23  
24 M, PET, and Zn, L, RAP. Since generated X-ray signals from each pixel were the  
25  
26 smallest part of a distribution map, we simultaneously obtained element maps with  
27  
28 qualitative analyses of pixels in the focused area. The distribution of amino nitrogen  
29  
30 corresponding to the pathological image was also mapped for each sample.  
31  
32  
33  
34  
35  
36  
37  
38  
39

### 40 **Statistical analysis**

41  
42 Comparisons of categorical data were made with chi-square or Fisher's exact test.  
43  
44 Nonparametric numeric data were compared by Mann-Whitney's U-test. A p Value  
45  
46 <0.05 was considered significant.  
47  
48  
49  
50

## 51 **RESULTS**

### 52 **Characteristics of subject**

53  
54  
55  
56 When we held the Tokyo ILD Meeting, 22 cases were collected and suspected to be  
57  
58  
59  
60

1  
2  
3  
4  
5  
6 hard metal lung diseases due to occupational history and pathological findings, but 3  
7  
8 cases were excluded because tungsten or cobalt were not detected in the lung tissue.  
9  
10 Nineteen patients were finally diagnosed as hard metal lung disease because of presence  
11  
12 of tungsten in lung specimens detected by EPMA-WDS. In 4 of 19 patients, the  
13  
14 presence of tungsten, cobalt, or tantalum was not known in the first place and proved by  
15  
16 element analysis at the meeting.  
17  
18  
19

20 Occupational history and clinical features are summarized in Table 1 and 2.  
21  
22 Demographic findings in 6 of these patients have been reported previously (case 2, 5, 7,  
23  
24 8, 10, and 16 corresponding to case 1, 3, 5, 6, 14, and 16 in 2007 report,  
25  
26 respectively).[7] All the subjects had an occupational history of hard metal industry  
27  
28 for 1 to 36 years. One patient (case 15) was doing deskwork in an insufficiently  
29  
30 ventilated room of a hard metal grinding company. Five patients had occupational  
31  
32 history of hard metal industry but were not exposed at the diagnosis of hard metal lung  
33  
34 disease. The delay between cessation of exposure and biopsy in the patients were 5  
35  
36 years, 4 months, 2 months, and 6 months for case 1, 2, 8, and 14, respectively. Case 10  
37  
38 had worked as a metal grinder for 6 years and then as a chimney cleaner at a copper  
39  
40 mine for 32 years. He visited a hospital complaining of dry cough after 32-year work  
41  
42 as a chimney cleaner and was finally diagnosed as hard metal lung diseases 4 years later  
43  
44 by surgical biopsy. Five patients (case 2, 5, 7, 8, and 15) had an allergic history and  
45  
46 were patch tested for Co, Ni, Cr, Hg, Au, Zn, Mn, Ag, Pd, Pt, Sn, Cu, Fe, Al, In, Ir, Ti.  
47  
48 4 of 5 patients who had undergone patch testing (case 2, 5, 7, and 15) were found to be  
49  
50 positive for cobalt. Pulmonary function tests revealed restrictive lung defect  
51  
52  
53  
54  
55  
56  
57  
58  
59  
60

characterized by reduced vital capacity and lung diffusing capacity. BAL findings showed increased total cell counts, increased lymphocytes and eosinophils, with normal CD4/CD8 ratio. Bizarre multinucleated giant cells were noted in 3 patients.

**Table 1. Demographic features of subjects**

| Case | Age | Sex | Smoking history | Occupational history (hard metal exposure) | Exposure (y/m) start/duration | Bx year | Exposure at Dx |
|------|-----|-----|-----------------|--------------------------------------------|-------------------------------|---------|----------------|
| 1    | 39  | M   | non             | Hard metal shaping/drilling                | 2000/12                       | 2006    | No             |
| 2    | 53  | M   | ex              | Hard metal shaping/drilling                | 2002/30                       | 2002    | No             |
| 3    | 21  | M   | non             | Metal grinding                             | 2005/32                       | 2008    | Yes            |
| 4    | 42  | M   | ex              | Hard metal shaping/drilling                | 2005/36                       | 2009    | Yes            |
| 5    | 48  | M   | non             | Metal grinding                             | 2000/48                       | 2004    | NA             |
| 6    | 45  | M   | non             | Hard metal shaping/drilling                | 1982/60                       | 1987    | Yes            |
| 7    | 32  | F   | non             | Metal grinding                             | 1988/60                       | 1993    | Yes            |
| 8    | 32  | F   | non             | Metal grinding                             | 1997/72                       | 2003    | No             |
| 9    | 44  | F   | non             | Hard metal shaping/drilling                | 1990/72                       | 1996    | Yes            |
| 10   | 62  | M   | non             | Metal grinding                             | 1963/72                       | 2003    | No             |
| 11   | 40  | F   | non             | Hard metal shaping/drilling                | 1997/96                       | 2005    | NA             |
| 12   | 48  | M   | non             | Metal grinding                             | 1981/120                      | 1992    | NA             |
| 13   | 49  | F   | non             | Hard metal shaping/drilling                | 1999/120                      | 2009    | Yes            |
| 14   | 65  | F   | non             | Metal grinding                             | 1988/144                      | 2000    | No             |
| 15   | 50  | F   | non             | Desk worker in hard metal factory          | 1985/168                      | 1996    | Yes            |
| 16   | 53  | M   | non             | Quality control of hard metals             | 1974/264                      | 2001    | NA             |
| 17   | 60  | M   | ex              | Hard metal shaping/drilling                | 1972/276                      | 1995    | Yes            |
| 18   | 53  | M   | non             | Hard metal shaping/drilling                | 1971/372                      | 2005    | Yes            |
| 19   | 65  | M   | non             | Hard metal shaping/drilling                | 1963/444                      | 2008    | Yes            |

Abbreviation; Bx, biopsy; Dx, diagnosis; NA, not available.

**Table 2. Clinical characteristics of Patients with Hard metal lung disease**

|                              |                       | Value                             |
|------------------------------|-----------------------|-----------------------------------|
| Mean age at diagnosis (yrs)  |                       | 46.4 ± 14.1 (21 - 65)             |
| Gender                       | M/F                   | 12/7                              |
| Smoking history              | Cur/Ex/Never          | 0/3/16                            |
| Chief complaints             | dry cough             | 13/19                             |
|                              | breath shortness      | 8/19                              |
| Pneumothorax                 | Yes                   | 8/19                              |
| Allergic history             | Yes                   | 5/19                              |
| Patch test to cobalt         | positive              | 4/5                               |
| Mean exposure duration (yrs) |                       | 10.7 ± 10.3 (1 - 36)              |
| Physical findings            | rales on auscultation | 11/19                             |
|                              | fine crackles         | 8/19                              |
|                              | finger clubbing       | 4/18                              |
|                              | edema of leg          | 1/16                              |
| Laboratory tests             | KL-6                  | 502.7 ± 267.5 U/ml                |
|                              | SP-D                  | 216.1 ± 192.4 ng/ml               |
| Pulmonary function tests     |                       |                                   |
|                              | %VC                   | 64.8 ± 25.3 %                     |
|                              | FEV <sub>1</sub> %    | 85.6 ± 10.7 %                     |
|                              | %DLco                 | 53.4 ± 17.0 %                     |
| Bronchoalveolar lavage       |                       |                                   |
|                              | Total cell count      | 3.13 ± 2.11 × 10 <sup>5</sup> /ml |
|                              | Lymphocytes           | 24.3 ± 22.3 %                     |
|                              | Neutrophils           | 3.07 ± 2.86 %                     |
|                              | Eosinophils           | 3.01 ± 5.03 %                     |
|                              | CD4/8 ratio           | 1.65 ± 2.96                       |

The mean numbers ± standard deviations and ranges in parentheses are shown.

Abbreviation; KL-6, Krebs von den Lungen 6; SP-D, surfactant protein D; VC, vital capacity; FEV<sub>1</sub>,

Forced expiratory volume in 1 second; DLco, Carbon monoxide diffusing capacity

### **Radiological findings**

HRCT of all patients except one with hard metal lung disease were available for review of radiological findings. Conventional CT findings of case 12 were added to the table (Table 3). Centrilobular nodules (Fig 1 A, B) and ground glass opacity were identified in chest CT of 16 patients. In some patients, reticular opacities, traction bronchiectasis, and subpleural curvilinear opacities were also present (Fig 1 C, D). Although centrilobular micronodular opacities were noted in those patients, they were not predominant.

**Table 3. Radiologic findings of patients with hard metal lung disease**

| Case | CT features |     |                    | radiological diagnosis                                                                                                |
|------|-------------|-----|--------------------|-----------------------------------------------------------------------------------------------------------------------|
|      | CL nodules  | GGO | PTx other findings |                                                                                                                       |
| 1    | +           | -   | -                  | bronchial wall thickening<br>bronchitis (DPB like)                                                                    |
| 2    | +           | +   | -                  | reticular opacities<br>chronic IP, NOS (NSIP or UIP)                                                                  |
| 3    | +           | +   | +                  | subacute HP                                                                                                           |
| 4    | +           | -   | +                  | subpleural curvilinear opacities<br>subacute HP                                                                       |
| 5    | +           | +   | -                  | subacute HP                                                                                                           |
| 6    | -           | +   | -                  | reticular opacities, consolidation<br>Interstitial pneumonia NOS                                                      |
| 7    | +           | +   | +                  | subacute HP                                                                                                           |
| 8    | +           | +   | -                  | traction bronchiectasis<br>subacute HP                                                                                |
| 9    | +           | +   | -                  | subacute HP                                                                                                           |
| 10   | +           | +   | -                  | reticular opacities<br>traction bronchiectasis<br>UIP                                                                 |
| 11   | +           | -   | +                  | subacute HP                                                                                                           |
| 12   | +           | +   | +                  | subpleural curvilinear opacities<br>chronic HP                                                                        |
| 13   | +           | +   | -                  | subacute HP                                                                                                           |
| 14   | +           | +   | -                  | traction bronchiectasis, apical cap<br>chronic HP                                                                     |
| 15   | +           | +   | +                  | traction bronchiectasis<br>subacute HP                                                                                |
| 16   | -           | +   | +                  | subpleural/peribronchovascular<br>consolidation, atelectasis, bulla<br>upper lobe predominant IP<br>or chronic IP NOS |
| 17   | +           | +   | -                  | bullae, centrilobular emphysema<br>UIP                                                                                |
| 18   | -           | +   | -                  | reticular opacities<br>chronic IP, NOS (NSIP or UIP)                                                                  |
| 19   | +           | +   | -                  | reticular opacities<br>chronic HP                                                                                     |

Abbreviation; CL, centrilobular; GGO, ground-glass opacities; PTx, pneumothorax; DPB, diffuse panbronchiolitis; IP, interstitial pneumonia; NOS, not otherwise specified; NSIP, non-specific interstitial pneumonia; UIP, usual interstitial pneumonia; HP, hypersensitivity pneumonitis

### Pathological findings and elemental analysis

Pathological findings and detected elements in lung tissue of 19 cases were summarized in Table 4. Four major histological features noted in this study were as follows: GIP



1  
2  
3  
4  
5  
6 characterized with centrilobular fibrosis (Fig 2 A, B) and characteristic giant cells  
7  
8 showing cannibalism (Fig 2 C), centrilobular inflammation/fibrosis similar to GIP but  
9  
10 without giant cells, UIP pattern characterized with patchy distribution and temporal  
11  
12 heterogeneity, and dense fibrosis with fibroblastic foci (Fig 3 A, B, D, E, F) [12], upper  
13  
14 lobe fibrosis characterized with apical scar/cap type fibrosis mainly in the upper  
15  
16 lobe.[13] In the case of upper lobe fibrosis, biopsy specimen contained apical cap-like  
17  
18 subpleural dense fibrosis which was composed of airspace fibrosis (intraluminal  
19  
20 organization) with collapse and increased elastic framework. In autopsy taken 4 years  
21  
22 later, we recognized remarkable subpleural elastosis with a few of cannibalistic giant  
23  
24 cells.  
25  
26  
27  
28

29  
30 Elemental analyses of lung specimens of GIP and centrilobular  
31  
32 inflammation/fibrosis demonstrated that tungsten was mapped almost throughout the  
33  
34 centrilobular fibrotic areas (Fig 2 D, E). Analyses of lung specimens of UIP pattern by  
35  
36 EPMA-WDS revealed that tungsten and tantalum were distributed in periarteriolar area  
37  
38 (Fig 4, D, E) and in subpleural fibrosis with dense acellular collagen (Fig 4 G, H, J, K).  
39  
40 However, these elements were not accompanied by centrilobular inflammation/fibrosis  
41  
42 (Fig 4, A, B). Lung histopathology in one case showed apical cap-like fibrosis with  
43  
44 tungsten deposits detected in the fibrotic region but without GIP.[14] In total,  
45  
46 elemental analysis by EPMA-WDS detected tungsten but no cobalt or tantalum in 10  
47  
48 patients, tungsten and cobalt in 5 patients, and tungsten and tantalum in 4 patients  
49  
50 (Table 4).  
51  
52  
53  
54  
55  
56  
57  
58  
59  
60

**Table 4. Pathological findings and elemental analysis of patients with hard metal lung disease**

| Case | sampling      |                | pathological findings               | elements detected |    |    |
|------|---------------|----------------|-------------------------------------|-------------------|----|----|
|      | method        | site(s)        |                                     | W                 | Co | Ta |
| 1    | VATS          | rt. S5/S8      | centrilobular inflammation/fibrosis | +                 | -  | -  |
| 2    | VATS          | lt. S2/S9      | GIP                                 | +                 | -  | -  |
| 3    | TBB/VATS      | rt. apex       | GIP                                 | +                 | -  | -  |
| 4    | VATS          | rt. S9         | centrilobular inflammation/fibrosis | +                 | -  | -  |
| 5    | VATS          | rt. S4/S9      | GIP                                 | +                 | -  | -  |
| 6    | Autopsy       | NA             | GIP, DAD                            | +                 | -  | -  |
| 7    | VATS          | rt. S8         | centrilobular inflammation/fibrosis | +                 | +  | -  |
| 8    | VATS          | rt. S4/S6      | GIP                                 | +                 | -  | +  |
| 9    | VATS          | rt. S2/S6      | GIP                                 | +                 | +  | -  |
| 10   | VATS          | lt. S1+2/S10   | UIP, GIP                            | +                 | -  | +  |
| 11   | VATS          | lt. S1+2/S9    | GIP                                 | +                 | +  | -  |
| 12   | Autopsy       | NA             | GIP, DAD                            | +                 | -  | -  |
| 13   | VATS          | lt. S1+2/S6    | GIP                                 | +                 | -  | -  |
| 14   | VATS          | lt. S4/S9      | GIP, UIP/NSIP?                      | +                 | -  | +  |
| 15   | VATS          | rt. S6         | GIP                                 | +                 | +  | -  |
| 16   | VATS/autopsy  | lt. S1+2/whole | upper lobe fibrosis                 | +                 | -  | +  |
| 17   | TBB/Lobectomy | -/RLL          | UIP                                 | +                 | -  | -  |
| 18   | VATS          | lt. S1+2/S9    | UIP                                 | +                 | +  | -  |
| 19   | VATS          | rt. S3/S10     | UIP, centrilobular fibrosis         | +                 | -  | +  |

Abbreviation; TBB, trans-bronchial biopsy; VATS, video-assisted thoracic surgery; GIP, giant cell interstitial pneumonia; NA, not available; RLL, right lower lobectomy; DAD, diffuse alveolar damage; UIP, usual interstitial pneumonia; NSIP, non-specific interstitial pneumonia

### Comparison of clinical features

We then classified the patients with hard metal lung disease into two groups according to their pathological findings. We grouped GIP and centrilobular inflammation/fibrosis together, because the latter pattern was considered to be a variant

of GIP due to the similar distribution of lesions. One patient was pathologically diagnosed as upper lobe fibrosis. It has such characteristic findings of subpleural, zonal, rather well defined fibrosis with small cysts and honeycomb lesions similar to that of UIP pattern that we grouped UIP pattern and upper lobe fibrosis together and named them the fibrosis group. We then compared clinical features between the GIP group and the fibrosis group. The GIP group was younger, had shorter exposure duration, lower serum KL-6, and higher lymphocyte percentage in BAL fluid compared with the fibrosis group (Table 5).

**Table 5. Comparison of clinical features between GIP group and fibrosis group**

|                                         | GIP group<br>(n=14) | Fibrosis group<br>(n=5) | p-value |
|-----------------------------------------|---------------------|-------------------------|---------|
| Age (yrs)                               | 43.1 ± 10.8         | 58.6 ± 5.41             | 0.007   |
| Gender (M/F)                            | 7/7                 | 5/0                     | 0.106   |
| Exposure duration (months)              | 73.0 ± 48.8         | 285.6 ± 140.3           | 0.007   |
| Pneumothorax (+/-)                      | 6/8                 | 2/3                     | 1.000   |
| KL-6 (U/ml)                             | 398.7 ± 189.4       | 710.8 ± 297.7           | 0.023   |
| SP-D (ng/ml)                            | 260.3 ± 257.5       | 161.0 ± 54.75           | 0.903   |
| PaO <sub>2</sub> (Torr)                 | 84.3 ± 14.3         | 84.4 ± 11.2             | 0.922   |
| PaCO <sub>2</sub> (Torr)                | 42.8 ± 2.75         | 56.0 ± 34.6             | 0.657   |
| %VC (%)                                 | 64.4 ± 27.1         | 65.5 ± 24.1             | 0.734   |
| FEV <sub>1</sub> (%)                    | 85.4 ± 12.9         | 86.1 ± 2.62             | 0.910   |
| %DLco (%)                               | 50.8 ± 16.7         | 57.2 ± 18.8             | 0.371   |
| Bronchoalveolar lavage                  |                     |                         |         |
| Total cell count (×10 <sup>5</sup> /ml) | 3.52 ± 2.41         | 2.26 ± 0.96             | 0.395   |
| Lymphocytes (%)                         | 31.5 ± 23.0         | 8.40 ± 9.08             | 0.015   |
| CD4/8 ratio                             | .76 ± 0.51          | 3.22 ± 4.85             | 0.298   |

Abbreviation; KL-6, Krebs von den Lungen 6; SP-D, surfactant protein D; VC, vital capacity; FEV<sub>1</sub>, Forced expiratory volume in 1 second; DLco, Carbon monoxide diffusing capacity

## DISCUSSION

Pathological features of GIP are interstitial pneumonia with centrilobular fibrosis with multinucleated giant cells in the airspaces.[15] Sometimes centrilobular inflammation/fibrosis is only noted with few giant cells. EPMA-WDS analysis of lung tissue of hard metal lung disease demonstrated that tungsten was distributed in a relatively high concentration almost throughout the centrilobular fibrosis and in giant cells.[7] Comparison of distribution of inflammatory cells and tungsten suggested that inhaled hard metal elements were associated with centrilobular inflammation/fibrosis by CD163<sup>+</sup> macrophages in cooperation with CD8<sup>+</sup> lymphocytes. Thus, centrilobular inflammation/fibrosis without giant cells should also be a variant of hard metal lung disease. GIP was also found in Belgian diamond polishers exposed not to hard metal dust, but to cobalt-containing dust, which confirmed that cobalt plays a dominant role in hard metal lung disease.[16] Cobalt is a well-known skin sensitizer, causing allergic contact dermatitis, and it can also cause occupational asthma.[17] Four patients were positive for patch testing for cobalt. Although such patch testing has been claimed to carry some risk of aggravation of disease in the situation with beryllium, cobalt is included in the routine metal allergy test panel and caused no worsening of hard metal lung disease. Hard metal lung disease cases show features of hypersensitivity pneumonitis (HP) with small interstitial granulomas, although well formed granulomas as in chronic beryllium disease are very rarely seen in the disease or HP. These data suggest that allergic inflammation may be different between hard metal lung disease/HP and berylliosis.

1  
2  
3  
4  
5  
6 Respiratory symptoms of hard metal lung diseases sometimes improve on holidays  
7  
8 and exacerbate during workdays, which resemble those of HP. Histopathology  
9  
10 findings in HP may also include centrilobular fibrosis in association with isolated giant  
11  
12 cells.[18] However, they do not show cannibalism as those in hard metal lung disease.  
13  
14 BAL is the most sensitive tool to detect HP: a marked lymphocytosis with decreased  
15  
16 CD4/8 ratio is characteristic of BAL findings.[19] BAL findings of patients with hard  
17  
18 metal lung disease show increased total cell counts with increased lymphocytes and  
19  
20 decreased CD4/CD8 ratio.[4, 20-22] Reduced CD4/8 ratio is consistent with the  
21  
22 findings of immunohistochemistry in the previous study.[7] In this study, we found  
23  
24 that lymphocyte percentage in BAL fluid was increased with rather low CD4/8 ratio in  
25  
26 the GIP group, but they were not recognized in fibrosis group.  
27  
28  
29  
30  
31

32  
33 UIP pattern is the pathological abnormality associated with various restrictive lung  
34  
35 diseases, including idiopathic pulmonary fibrosis (IPF). Interstitial inflammation and  
36  
37 fibrosis in UIP pattern does not usually involve centrilobular area and peribronchioles.  
38  
39 Three cases who were pathologically diagnosed as UIP pattern also had centrilobular  
40  
41 micronodular opacities in HRCT findings. One patient was pathologically diagnosed  
42  
43 as UIP pattern and centrilobular fibrosis. Element analysis of the deposition in lung  
44  
45 tissues from patients with IPF/UIP usually demonstrates following elements; Si, Al, Fe,  
46  
47 and Ti with various degrees (unpublished data). While we found tungsten accumulated  
48  
49 in periarteriolar area and subpleural fibrosis in lung specimens of UIP pattern in this  
50  
51 study. However, tungsten in periarteriolar area was hardly associated with any fibrosis  
52  
53 or inflammatory cells. These results suggest that individual immune  
54  
55  
56  
57  
58  
59  
60

1  
2  
3  
4  
5  
6 susceptibility/response to inhaled hard metal elements may decide pathological patterns  
7  
8 of UIP, GIP, or their mixture in varying degrees. Patients develop hard metal lung  
9  
10 disease usually after mean exposure duration of more than 10 years. Although most  
11  
12 studies have found no relation between disease occurrence and length of occupational  
13  
14 exposure, individuals with increased susceptibility may develop hard metal lung disease  
15  
16 after relatively short and low levels of exposure. The GIP group was younger and had  
17  
18 shorter exposure duration suggesting that those who had UIP pattern were individuals  
19  
20 with decreased susceptibility. Upper lobe fibrosis was pathologically diagnosed in one  
21  
22 patient. Although it is significantly different from UIP pattern, tungsten in the fibrosis  
23  
24 was not associated with inflammation around the element, either. With regard to the  
25  
26 relationship between hard metal elements and surrounding inflammation, upper lobe  
27  
28 fibrosis looks similar to UIP pattern in the other cases.  
29  
30  
31  
32  
33

34  
35 Liebow first described GIP as a form of idiopathic interstitial pneumonia.[23] It is  
36  
37 now recognized that GIP is pathognomonic for hard metal lung disease.[24] Since  
38  
39 tungsten and cobalt are only observed within the lungs of subjects who have been  
40  
41 exposed to hard metals, the presence of tungsten and/or cobalt in BAL fluid or lung  
42  
43 specimens leads to a definite diagnosis of hard metal lung disease. According to the  
44  
45 results of elemental analyses in this study, five cases with UIP pattern or upper lobe  
46  
47 fibrosis should be diagnosed as hard metal lung disease. The pathological findings of  
48  
49 UIP pattern demonstrated no physical connection between centrilobular fibrosis and the  
50  
51 UIP area, dense fibrosis with fibroblastic foci. Since centrilobular fibrosis is usually  
52  
53 irreversible, if GIP evolved to UIP, sequels of centrilobular fibrosis would be somewhat  
54  
55  
56  
57  
58  
59  
60

1  
2  
3  
4  
5  
6 linked to peripheral UIP lesion. EPMA-WDS analyses of lung specimens of UIP  
7  
8 pattern revealed that tungsten and tantalum in periarteriolar area were not accompanied  
9  
10 by centrilobular inflammation/fibrosis as seen in typical GIP. In addition, clinical  
11  
12 features of the fibrosis group were different from those of the GIP group. We  
13  
14 identified tungsten in subpleural fibrosis with dense acellular collagen from UIP pattern  
15  
16 and in the fibrotic region from apical cap-like fibrosis. Fibrotic reactions of these  
17  
18 patients could have caused accumulation of hard metal particles as the scars contract  
19  
20 and cut off lymphatic drainage. Those who are not sensitive to hard metal elements,  
21  
22 particularly cobalt, might simply have idiopathic UIP or upper lobe fibrosis by accident  
23  
24 as everyone with interstitial lung disease and a history of asbestos exposure does not  
25  
26 have asbestosis.[25] However, microscopic findings of the lung specimen of UIP  
27  
28 pattern included mild centrilobular inflammation and multinucleated giant cells with  
29  
30 cannibalism, which could never been seen in idiopathic UIP/IPF. If we find tungsten  
31  
32 or cobalt in the biopsies of UIP/fibrosis from the subjects who worked in the hard-metal  
33  
34 industry, we cannot help but make a diagnosis of hard-metal lung disease. Given  
35  
36 present information, we only conclude that the UIP/fibrosis may be induced by hard  
37  
38 metal elements, or just a coincidence. Longitudinal data of the relative frequencies of  
39  
40 incidence of the two diseases, hard metal lung disease and IPF, allow us to infer the  
41  
42 likelihood of someone with hard metal exposure developing idiopathic UIP/IPF.  
43  
44  
45  
46  
47  
48  
49  
50

51  
52 Hard metal lung disease is caused by exposure to cobalt and tungsten carbide.  
53  
54 Toxicity stems from reactive oxygen species generation in a mechanism involving both  
55  
56 elements in mutual contact.[26] Inhaled cobalt and tungsten carbides may cause lung  
57  
58  
59  
60

1  
2  
3  
4  
5  
6 toxicity even in those who are less sensitive to those elements, which can result in lung  
7  
8 fibrosis with GIP features. Qualitative elemental analysis of fibrosing lesion in GIP  
9  
10 also demonstrated the presence of miscellaneous elements: Al, Si, Ti, Cr, and Fe, in  
11  
12 addition to tungsten, cobalt, and/or Ta.[7] Several sources of evidence suggest that  
13  
14 environmental agents may have an etiologic role in IPF. A meta-analysis of six  
15  
16 case-control studies demonstrated that six exposures including cigarette smoking,  
17  
18 agriculture/farming, livestock, wood dust, metal dust, and stone/sand were significantly  
19  
20 associated with IPF.[27] Metal dust must contain various metal elements. In an  
21  
22 EPMA analysis field of the lung biopsy specimen from upper lobe fibrosis, we found  
23  
24 tungsten scattered throughout the fibrosis as well as aluminum, silicon, and  
25  
26 titanium.[14] Miscellaneous metal dust inhaled in addition to tungsten and cobalt may  
27  
28 cause UIP pattern in less sensitive individuals.  
29  
30  
31  
32  
33  
34  
35  
36

### 37 **Acknowledgement**

38  
39 The authors thank the following doctors for the supply of cases: Dr. Y. Endo from  
40  
41 Nagaoka Chuo General Hospital, Dr. M. Amano and Dr. S. Aoki from Showa General  
42  
43 Hospital, Dr. T. Ishiguro from Gifu Municipal Hospital, Dr. M. Sakai from Saga Social  
44  
45 Insurance Hospital, Dr. M. Tajiri from Kurume University, Dr T. Ishida from Niigata  
46  
47 Prefectural Central Hospital, Dr. K. Koreeda from Minami Kyusyu National Hospital,  
48  
49 Dr. K. Okuno from Kasai City Hospital, Dr. Y. Shimaoka from Nagaoka Red Cross  
50  
51 Hospital, Dr. K. Kashiwada from Nippon Medical School, Dr. T. Sawada and Dr. A.  
52  
53 Shiihara from Kanagawa Cardiovascular and Respiratory Center, Dr. K. Tachibana from  
54  
55  
56  
57  
58  
59  
60



1  
2  
3  
4  
5  
6 National Hospital Organization Kinki-chuo Chest Medical Center, Dr. T. Azuma from  
7  
8 Shinshu University, Dr. K. Hara and Dr. T. Ishihara from NTT east corporation Kanto  
9  
10 Medical Center, Dr. Y. Waseda from Kanazawa University, Dr. H. Ishii from Oita  
11  
12 University, Dr. H. Matsuoka from Osaka Prefectural Medical Center for Respiratory and  
13  
14 Allergic Diseases, Dr. A Hara from Nagasaki University, Dr. O. Hisata from Tohoku  
15  
16 University, and Dr. H. Tokuda from Social Insurance Chuo General Hospital. The  
17  
18 authors also would like to acknowledge Dr. Kouichi Watanabe and Mr. Masayoshi  
19  
20 Kobayashi of EPMA Laboratory, Center of Instrumental Analysis, Niigata University,  
21  
22 who contributed to elemental analysis of lung specimens.  
23  
24  
25  
26  
27  
28  
29  
30  
31  
32  
33  
34  
35  
36  
37  
38  
39  
40  
41  
42  
43  
44  
45  
46  
47  
48  
49  
50  
51  
52  
53  
54  
55  
56  
57  
58  
59  
60

## References

1. Nemery B. Metal toxicity and the respiratory tract. *Eur Respir J*. 1990;**3**:202-19.
2. Kelleher P, Pacheco K, Newman LS. Inorganic dust pneumonias: the metal-related parenchymal disorders. *Environmental health perspectives*. 2000;**108 Suppl 4**:685-96.
3. Takada T, Moriyama H. Hard Metal Lung Disease. In: Huang Y-CT, Ghio AJ, Maier LA, editors. *A Clinical Guide to Occupational and Environmental Lung Diseases Respiratory Medicine*. New York: Springer; 2012. p. 217-30.
4. Davison AG, Haslam PL, Corrin B et al. Interstitial lung disease and asthma in hard-metal workers: bronchoalveolar lavage, ultrastructural, and analytical findings and results of bronchial provocation tests. *Thorax*. 1983;**38**:119-28.
5. Cugell DW. The hard metal diseases. *Clin Chest Med*. 1992;**13**:269-79.
6. Anttila S, Sutinen S, Paananen M et al. Hard metal lung disease: a clinical, histological, ultrastructural and X-ray microanalytical study. *Eur J Respir Dis*. 1986;**69**:83-94.
7. Moriyama H, Kobayashi M, Takada T et al. Two-dimensional analysis of elements and mononuclear cells in hard metal lung disease. *Am J Respir Crit Care Med*. 2007;**176**:70-7.
8. Ohori NP, Sciruba FC, Owens GR et al. Giant-cell interstitial pneumonia and hard-metal pneumoconiosis. A clinicopathologic study of four cases and review of the literature. *Am J Surg Pathol*. 1989;**13**:581-7.
9. Travis WD, Matsui K, Moss J et al. Idiopathic nonspecific interstitial pneumonia: prognostic significance of cellular and fibrosing patterns: survival comparison with

1  
2  
3  
4  
5  
6 usual interstitial pneumonia and desquamative interstitial pneumonia. *Am J Surg Pathol*.

7  
8 2000;**24**:19-33.

9  
10 10. Katzenstein AL, Myers JL. Idiopathic pulmonary fibrosis: clinical relevance of  
11 pathologic classification. *Am J Respir Crit Care Med*. 1998;**157**:1301-15.

12  
13 11. Moriyama H, Yamamoto T, Takatsuka H et al. Expression of macrophage  
14 colony-stimulating factor and its receptor in hepatic granulomas of  
15 Kupffer-cell-depleted mice. *Am J Pathol*. 1997;**150**:2047-60.

16  
17 12. American Thoracic Society. Idiopathic pulmonary fibrosis: diagnosis and treatment.  
18 International consensus statement. American Thoracic Society (ATS), and the European  
19 Respiratory Society (ERS). *Am J Respir Crit Care Med*. 2000;**161**:646-64.

20  
21 13. Shiota S, Shimizu K, Suzuki M et al. [Seven cases of marked pulmonary fibrosis in  
22 the upper lobe]. *Nihon Kokyuki Gakkai Zasshi*. 1999;**37**:87-96.

23  
24 14. Kaneko Y, Kikuchi N, Ishii Y et al. Upper lobe-dominant pulmonary fibrosis  
25 showing deposits of hard metal component in the fibrotic lesions. *Intern Med*.  
26 2010;**49**:2143-5.

27  
28 15. Naqvi AH, Hunt A, Burnett BR et al. Pathologic spectrum and lung dust burden in  
29 giant cell interstitial pneumonia (hard metal disease/cobalt pneumonitis): review of 100  
30 cases. *Arch Environ Occup Health*. 2008;**63**:51-70.

31  
32 16. Demedts M, Gheysens B, Nagels J et al. Cobalt lung in diamond polishers. *The*  
33  
34  
35  
36  
37  
38  
39  
40  
41  
42  
43  
44  
45  
46  
47  
48  
49  
50  
51  
52  
53  
54  
55  
56  
57  
58  
59  
60  
*American review of respiratory disease*. 1984;**130**:130-5.

17. Nemery B, Verbeken EK, Demedts M. Giant cell interstitial pneumonia (hard metal  
lung disease, cobalt lung). *Semin Respir Crit Care Med*. 2001;**22**:435-48.

- 1  
2  
3  
4  
5  
6 18. Churg A, Muller NL, Flint J et al. Chronic hypersensitivity pneumonitis. *Am J Surg*  
7  
8 *Pathol.* 2006;**30**:201-8.  
9
- 10 19. D'Ippolito R, Chetta A, Foresi A et al. Induced sputum and bronchoalveolar lavage  
11  
12 from patients with hypersensitivity pneumonitis. *Respir Med.* 2004;**98**:977-83.  
13
- 14 20. Okuno K, Kobayashi K, Kotani Y et al. A case of hard metal lung disease  
15  
16 resembling a hypersensitive pneumonia in radiological images. *Intern Med.*  
17  
18 2010;**49**:1185-9.  
19
- 20 21. Kakugawa T, Mukae H, Nagata T et al. Giant cell interstitial pneumonia in a  
21  
22 15-year-old boy. *Intern Med.* 2002;**41**:1007-12.  
23
- 24 22. Forni A. Bronchoalveolar lavage in the diagnosis of hard metal disease. *Sci Total*  
25  
26 *Environ.* 1994;**150**:69-76.  
27
- 28 23. Liebow AA. Definition and classification of interstitial pneumonias in human  
29  
30 pathology. *Prog Respir Res.* 1975:1-33.  
31
- 32 24. Abraham JL, Burnett BR, Hunt A. Development and use of a pneumoconiosis  
33  
34 database of human pulmonary inorganic particulate burden in over 400 lungs. *Scanning*  
35  
36 *Microsc.* 1991;**5**:95-104; discussion 5-8.  
37
- 38 25. Gaensler EA, Jederlinic PJ, Churg A. Idiopathic pulmonary fibrosis in  
39  
40 asbestos-exposed workers. *The American review of respiratory disease.*  
41  
42 1991;**144**:689-96.  
43
- 44 26. Fubini B. Surface reactivity in the pathogenic response to particulates.  
45  
46 *Environmental health perspectives.* 1997;**105 Suppl 5**:1013-20.  
47
- 48 27. Taskar VS, Coultas DB. Is idiopathic pulmonary fibrosis an environmental disease?  
49  
50  
51  
52  
53  
54  
55  
56  
57  
58  
59  
60

1  
2  
3  
4  
5  
6 *Proc Am Thorac Soc.* 2006;3:293-8.  
7  
8  
9  
10  
11  
12  
13  
14  
15  
16  
17  
18  
19  
20  
21  
22  
23  
24  
25  
26  
27  
28  
29  
30  
31  
32  
33  
34  
35  
36  
37  
38  
39  
40  
41  
42  
43  
44  
45  
46  
47  
48  
49  
50  
51  
52  
53  
54  
55  
56  
57  
58  
59  
60

For peer review only

## FIGURE LEGENDS

### Figure 1

High-resolution computed tomography of the chest illustrating differences in the radiographic appearance of the lungs in giant cell interstitial pneumonia (GIP) and in usual interstitial pneumonia (UIP) pattern. (A, B) In GIP of case 9, centrilobular micronodular opacities pathologically correspond to centrilobular fibrosis and giant cell accumulation within the alveolar space. (C, D) In UIP pattern of case 10, reticular opacities and traction bronchiectasis are present with centrilobular micronodular opacities.

### Figure 2

Representative images of light microscopic findings and electron probe microanalyser with wavelength dispersive spectrometer (EPMA-WDS) of S6 specimen from case 9 pathologically diagnosed as giant cell interstitial pneumonia. (A, B, and C) The black square area in centrilobular fibrosis is stepwise magnified to show multinucleated giant cells with cannibalism. (A, D) The green square area in subpleural zone is elementally analyzed by EPMA-WDS to show (E) many orange spots corresponding to tungsten. A qualitative colored image of tungsten distribution is superimposed onto a lung tissue image of amino nitrogen colored green. Note that tungsten is widely distributed in centrilobular fibrosis as well as surrounding alveolar walls. Original magnification, (A) panoramic view, (B) x 4, (C) x 60, and (D) x 8.

**Figure 3**

Representative images of light microscopic findings of lung specimen from case 10 with hard metal lung disease pathologically diagnosed as usual interstitial pneumonia pattern. (A, B) A low magnification view of left S1+2 specimen demonstrates a combination of patchy interstitial fibrosis with alternating areas of normal lung and architectural alteration due to chronic scarring or honeycomb change. Note that there are several small bronchioles with mild centrilobular inflammation (blue arrows). (B, C) Multinucleated giant cells with cannibalism are also shown in a stepwise-magnified black square area located in subpleural fibrosis. (D, E, F) Left S10 specimen from the same patient also shows characteristic fibroblastic foci (black arrows) in the background of dense acellular collagen in a stepwise-magnified square area located in subpleural fibrosis. Original magnification, (A, D) panoramic view, (B) x 2, (C) x 40, (E) x 4 and (F) x 20.

**Figure 4**

Representative images of light micrographs and electron probe microanalyser with wavelength dispersive spectrometer (EPMA-WDS) of lung specimen from case 10 with hard metal lung disease pathologically diagnosed as usual interstitial pneumonia pattern (A). (B, C) An arteriole and its surrounding interstitium (orange square) are elementally analyzed by EPMA-WDS to demonstrate that (D) tungsten and (E) tantalum are distributed in periarteriolar area with little fibrosis. Elemental analysis by EPMA-WDS of subpleural fibrosis with dense acellular collagen (green square in B, F,

1  
2  
3  
4  
5  
6 I) also shows (G, J) tungsten and (H, K) tantalum almost randomly distributed in  
7  
8 magnified images (yellow squares in G and H are magnified to show (J) tungsten and  
9  
10 (K) tantalum). We did not further analyze the centrilobular pattern or the cannibalistic  
11  
12 giant cells shown in Fig 3. Note that the distribution of tungsten is not completely the  
13  
14 same as that of tantalum. Original magnification, (A) panoramic view and (B) x 4.  
15  
16 Scale bars for the magnification and scan areas for (E), (H), and (K) correspond to  
17  
18 100 $\mu$ m (0.768 x 0.768 mm), 200 $\mu$ m (1.536 x 1.536 mm), and 25 $\mu$ m (0.1792 x 0.1792  
19  
20 mm), respectively.  
21  
22  
23  
24  
25  
26  
27  
28  
29  
30  
31  
32  
33  
34  
35  
36  
37  
38  
39  
40  
41  
42  
43  
44  
45  
46  
47  
48  
49  
50  
51  
52  
53  
54  
55  
56  
57  
58  
59  
60



Fig 1

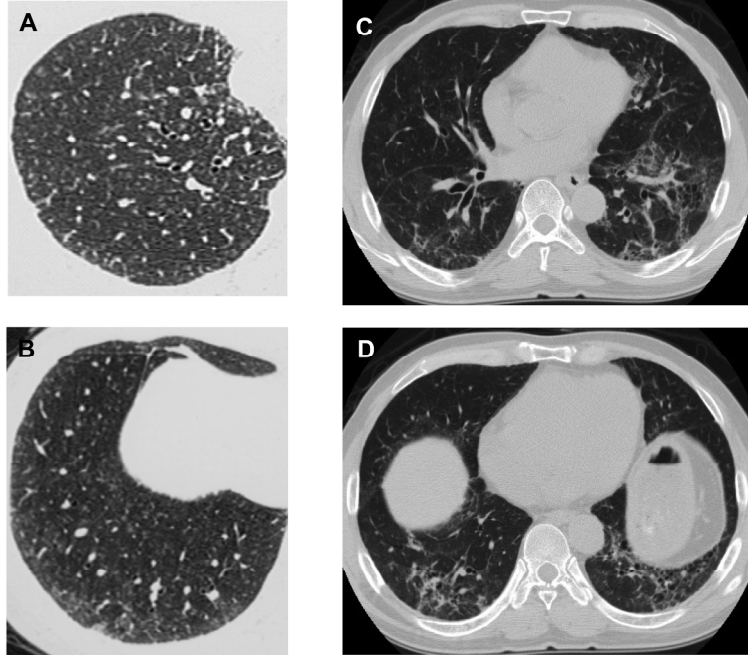

253x190mm (300 x 300 DPI)

ew only

1  
2  
3  
4  
5  
6  
7  
8  
9  
10  
11  
12  
13  
14  
15  
16  
17  
18  
19  
20  
21  
22  
23  
24  
25  
26  
27  
28  
29  
30  
31  
32  
33  
34  
35  
36  
37  
38  
39  
40  
41  
42  
43  
44  
45  
46  
47  
48  
49  
50  
51  
52  
53  
54  
55  
56  
57  
58  
59  
60

1  
2  
3  
4  
5  
6  
7  
8  
9  
10  
11  
12  
13  
14  
15  
16  
17  
18  
19  
20  
21  
22  
23  
24  
25  
26  
27  
28  
29  
30  
31  
32  
33  
34  
35  
36  
37  
38  
39  
40  
41  
42  
43  
44  
45  
46  
47  
48  
49  
50  
51  
52  
53  
54  
55  
56  
57  
58  
59  
60

Fig 2

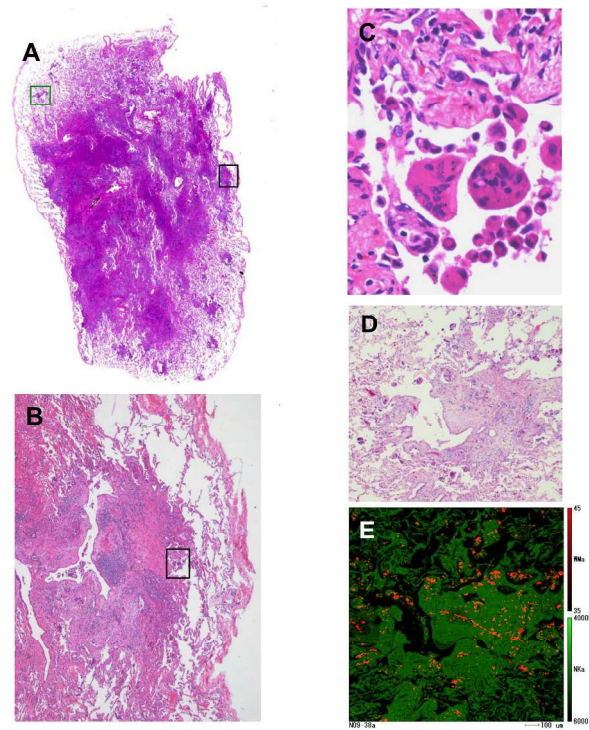

253x190mm (300 x 300 DPI)

ew only

1  
2  
3  
4  
5  
6  
7  
8  
9  
10  
11  
12  
13  
14  
15  
16  
17  
18  
19  
20  
21  
22  
23  
24  
25  
26  
27  
28  
29  
30  
31  
32  
33  
34  
35  
36  
37  
38  
39  
40  
41  
42  
43  
44  
45  
46  
47  
48  
49  
50  
51  
52  
53  
54  
55  
56  
57  
58  
59  
60

**Fig 3**

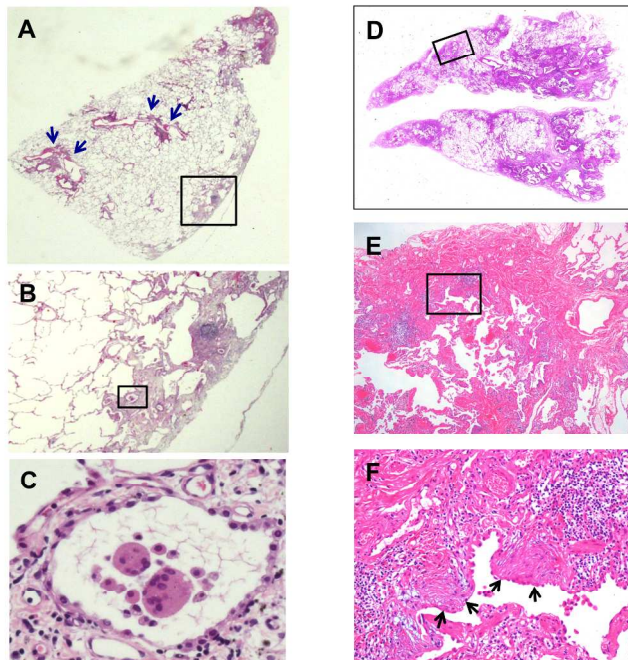

253x190mm (300 x 300 DPI)

ew only

1  
2  
3  
4  
5  
6  
7  
8  
9  
10  
11  
12  
13  
14  
15  
16  
17  
18  
19  
20  
21  
22  
23  
24  
25  
26  
27  
28  
29  
30  
31  
32  
33  
34  
35  
36  
37  
38  
39  
40  
41  
42  
43  
44  
45  
46  
47  
48  
49  
50  
51  
52  
53  
54  
55  
56  
57  
58  
59  
60

Fig 4

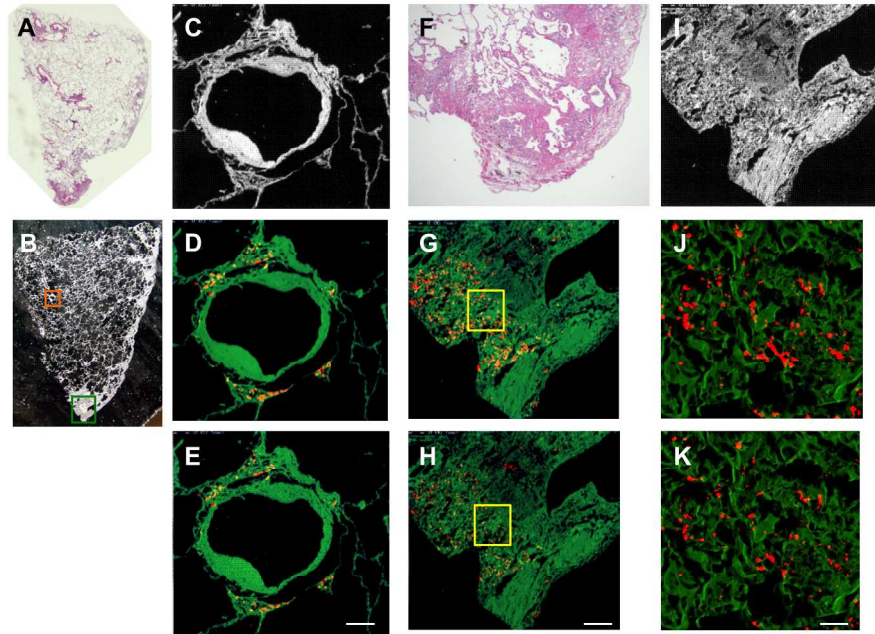

253x190mm (300 x 300 DPI)

ew only

1  
2  
3  
4  
5  
6 **An Observational Study of Giant Cell Interstitial Pneumonia and Lung Fibrosis in**  
7  
8 **Hard Metal Lung Disease**  
9

10 <sup>1</sup>Junichi Tanaka, MD, <sup>1</sup>Hiroshi Moriyama, MD, <sup>1</sup>Masaki Terada, MD, <sup>1</sup>Toshinori Takada,  
11 MD, <sup>2</sup>Eiichi Suzuki, MD, <sup>1</sup>Ichiei Narita, MD, <sup>3</sup>Yoshinori Kawabata, MD, <sup>3</sup>Tetsuo  
12 Yamaguchi, MD, <sup>3</sup>Akira Hebisawa, MD, <sup>3</sup>Fumikazu Sakai, MD, and <sup>3</sup>Hiroaki Arakawa,  
13 MD,  
14  
15  
16  
17  
18  
19

20 <sup>1</sup>Division of Respiratory Medicine, Graduate School of Medical and Dental Sciences,  
21 Niigata University, Niigata, Japan, <sup>2</sup>Department of General Medicine, Niigata  
22 University Medical and Dental Hospital, Niigata, Japan, <sup>3</sup>Tokyo Research Group for  
23 Diffuse Parenchymal Lung Diseases, Tokyo, Japan  
24  
25  
26  
27  
28  
29  
30  
31

32 Corresponding author: Toshinori Takada, M.D., PhD  
33

34 Division of Respiratory Medicine, Graduate School of Medical and Dental Sciences,  
35 Niigata University  
36  
37

38 1-757 Asahimachi-dori, Chuo-ku, Niigata, 951-8510, Japan  
39

40 Tel; +81-25-227-2200, Fax; +81-25-227-0775, Email; ttakada@med.niigata-u.ac.jp  
41  
42  
43  
44  
45  
46

47 Keywords: hard metal, pulmonary fibrosis, electron probe microanalysis  
48  
49  
50

51 Word count: 2,910  
52  
53  
54  
55  
56  
57  
58  
59  
60

**Statements**

## a. contributorship,

JT and HM, elemental analysis; ES, IN, and TY, interpretation of the results; MT, ES, YK, AH, pathological study; JT and TT, manuscript preparation; and FS and HA, radiological examination.

## b. funding,

This research received no specific funding.

## c. ethics,

We acquired consent from all treating physicians for each identified case according to the Guidelines for Epidemiological Studies from The Ministry of Health, Labor and Welfare. The Committee of Ethics, Niigata University, approved the EPMA-WDS study protocol (#396).

## d. data sharing,

There are no data shared in the study.



## ABSTRACT

**Background:** Hard metal lung disease has pathological patterns including giant cell interstitial pneumonia (GIP) and usual interstitial pneumonia (UIP). Although UIP pattern is considered the prominent feature in advanced disease, it is unknown whether GIP finally progresses to UIP pattern.

**Objective:** To clarify clinical, pathological, and elemental differences between GIP and UIP pattern in hard metal lung disease.

**Methods:** We obtained the clinical records, chest CT, and lung tissue from nineteen cases diagnosed as hard metal lung disease. Lung tissue was elementally analyzed by electron probe microanalyser. We classified the patients into two groups according to the pathological findings and statistically compared clinical data.

**Results:** Fourteen cases were pathologically diagnosed as GIP or centrilobular inflammation/fibrosing. The other five cases were UIP pattern or upper lobe fibrosis. Elemental analyses of lung specimens of GIP showed tungsten throughout the centrilobular fibrotic areas. In UIP pattern, tungsten was detected in periarteriolar area and subpleural fibrosis in no association with centrilobular fibrosis or inflammatory cell infiltration. The GIP group was younger (43.1 vs 58.6 yrs) with shorter exposure duration (73 vs 285 months) ( $p < 0.01$ ), lower serum KL-6 (398 vs 710 U/ml), and higher lymphocyte percentage in bronchoalveolar lavage fluid (31.5 vs 3.22 %) ( $p < 0.05$ ) than the fibrosis group.

**Conclusions** UIP pattern or upper lobe fibrosis is remarkably different from GIP in distribution of hard metal elements, associated interstitial inflammation and fibrosis,

1  
2  
3  
4  
5  
6 and clinical features. In hard metal lung disease, UIP pattern or upper lobe fibrosis  
7  
8 may not be an advanced form of GIP.  
9

### 10 11 12 **Strengths and limitations of this study**

13  
14  
15 1, Nineteen cases of hard metal lung disease, a rare occupational lung disease, were  
16  
17 collected and their clinical features were documented.  
18

19  
20 2, Lung tissue from all the patients was elementally analyzed by a patented technique,  
21  
22 an improved element analysis using electron probe microanalyzers with wavelength  
23  
24 dispersive spectrometer.  
25  
26

27  
28 3, Since the relative frequencies of incidence of hard metal lung disease and IPF, the  
29  
30 probability that someone with hard metal exposure will develop idiopathic UIP/IPF  
31  
32 cannot be inferred.  
33  
34  
35  
36  
37  
38  
39  
40  
41  
42  
43  
44  
45  
46  
47  
48  
49  
50  
51  
52  
53  
54  
55  
56  
57  
58  
59  
60



## INTRODUCTION

Hard metal is a synthetic compound that combines tungsten carbide with cobalt. Patients exposed to hard metal may develop occupational asthma, a syndrome resembling hypersensitivity pneumonitis, or interstitial lung disease which is recognized as hard metal lung disease.[1-3] In many cases with hard metal lung disease, multinucleated giant cells with centrilobular fibrosis are prominent resulting in a pattern of giant cell interstitial pneumonia (GIP).[4-6] We demonstrated that hard metal accumulated in the centrilobular area may trigger the inflammation in cooperation with CD163<sup>+</sup> monocyte-macrophages and CD8<sup>+</sup> lymphocytes using electron probe microanalyzers with wavelength dispersive spectrometer (EPMA-WDS).[7] In addition to classical GIP, hard metal lung disease has a variety of pathological patterns, desquamative interstitial pneumonia, obliterative bronchiolitis, and usual interstitial pneumonia (UIP) pattern.[4, 8] The lesions of classical GIP are usually centered on the centrilobular areas. On the other hand, the key histologic features of UIP are predominantly distributed at the periphery of the acinus or lobule.[9, 10] Hard metal lung disease has pathological patterns of both GIP and UIP, and the UIP pattern is thought to be the prominent feature in advanced cases of the disease.[8] The key question is whether UIP pattern is an advanced form of GIP or not. In order to elucidate relationship between GIP and lung fibrosis with detection of hard metal elements, we collected cases with tungsten in lung tissue and reviewed their clinical records. We then elementally reexamined lung specimens by EPMA-WDS. We finally classified the patients into two groups according to the histological findings and

1  
2  
3  
4  
5  
6 statistically compared their clinical features. Pathological and elemental analyses in  
7  
8 the study suggest that UIP pattern or upper lobe fibrosis may be different from an  
9  
10 end-stage form of GIP.  
11

## 12 13 14 15 **METHODS**

### 16 17 **Patient population**

18  
19 We collected patients by announcing inquiry for cases of hard metal lung disease to the  
20  
21 major medical institutes and hospitals all over Japan for the 10th annual meeting of the  
22  
23 Tokyo Research Group for Diffuse Parenchymal Lung Diseases. We obtained  
24  
25 information of patient profile such as age, gender, duration of hard metal exposure,  
26  
27 history of pneumothorax, history of allergy, symptoms, physical findings, serum levels  
28  
29 of Krebs von den Lungen-6 (KL-6) and SP-D, arterial blood gas data, pulmonary  
30  
31 function tests, bronchoalveolar lavage (BAL) cell profiles and treatment and prognosis  
32  
33 in order to make a data base. We acquired consent from all treating physicians for  
34  
35 each identified case according to the Guidelines for Epidemiological Studies from The  
36  
37 Ministry of Health, Labor and Welfare. The Committee of Ethics, Niigata University,  
38  
39 approved the EPMA-WDS study protocol (#396).  
40  
41  
42  
43  
44  
45  
46  
47  
48

### 49 **HRCT scan findings**

50  
51 All patients with hard metal lung disease except one had undergone high-resolution  
52  
53 computed tomography (HRCT) scanning. Two radiologists (observers) who were  
54  
55 blinded to clinical, laboratory, or pulmonary function test results evaluated CT scan  
56  
57  
58  
59  
60

1  
2  
3  
4  
5  
6 findings. The observers judged each CT scan for the presence or absence of three  
7  
8 main features of centrilobular nodules, ground glass opacity, and pneumothorax. They  
9  
10 also noted other remarkable findings; traction bronchiectasis, reticular pattern,  
11  
12 subpleural linear opacity, consolidation, bulla, centrilobular emphysema, atelectasis, and  
13  
14 bronchial wall thickening and entered these results into a data sheet independently.  
15  
16 After evaluation, disagreement on the results between the observers for some HRCT  
17  
18 scans was resolved by discussion and consensus.  
19  
20  
21  
22  
23  
24

### 25 **Sample preparation and pathological study**

26  
27 Each tissue sample was serially cut into 3  $\mu\text{m}$ -thickness sections and subjected to  
28  
29 pathological study and EPMA-WDS analysis. For pathological study, formalin-fixed 3  
30  
31  $\mu\text{m}$  serial sections were stained with hematoxylin-eosine and Elastica van Gieson  
32  
33 method. Two pathologists (observers), who were blinded to clinical, laboratory, or  
34  
35 pulmonary function test results, evaluated pathological findings. After evaluation,  
36  
37 disagreement on the pathological diagnoses between the observers for some specimens  
38  
39 was resolved by discussion and consensus.  
40  
41  
42  
43  
44  
45  
46

### 47 **Electron probe microanalysis**

48  
49 Examination of tissue sections with EMPA-WDS was performed according to  
50  
51 procedures previously described.[11] X-ray data were

52  
53 obtained with an EPMA-WDS (EPMA 8705, EPMA-1610, Shimadzu Ltd, Kyoto,  
54  
55 Japan). In order to have representative element maps, we at first microscopically  
56  
57  
58  
59  
60

1  
2  
3  
4  
5  
6 scanned tissue specimens and looked for lesions of centrilobular fibrosis with low  
7  
8 magnification because hard metal related elements, tungsten/cobalt were always found  
9  
10 around centrilobular areas according to our experiences. For EMPA analysis, we at  
11  
12 first screened areas of about 1.5 mm x 1.5 mm at largest covering centrilobular lesions  
13  
14 or fibrosing lesion of interstitial lung diseases observed by pathological study to make  
15  
16 rough element maps. Then we focused into areas from 5x5 to 10x10  $\mu\text{m}$  at smallest to  
17  
18 draw fine maps for elements. Each pixel in the focused areas in the tissue was scanned  
19  
20 by three wavelength dispersive crystals; RAP, PET, and LiF for screening elements of  
21  
22 Al, K, RAP; Si, K, PET; Ti, K, LiF; Cr, K, LiF; Fe, K, LiF; Co, K, LiF; Ta, M, PET; W,  
23  
24 M, PET, and Zn, L, RAP. Since generated X-ray signals from each pixel were the  
25  
26 smallest part of a distribution map, we simultaneously obtained element maps with  
27  
28 qualitative analyses of pixels in the focused area. The distribution of amino nitrogen  
29  
30 corresponding to the pathological image was also mapped for each sample.  
31  
32  
33  
34  
35  
36  
37  
38  
39

### 40 **Statistical analysis**

41  
42 Comparisons of categorical data were made with chi-square or Fisher's exact test.  
43  
44 Nonparametric numeric data were compared by Mann-Whitney's U-test. A p Value  
45  
46 <0.05 was considered significant.  
47  
48  
49  
50

## 51 **RESULTS**

### 52 **Characteristics of subject**

53  
54  
55  
56 When we held the Tokyo ILD Meeting, 22 cases were collected and suspected to be  
57  
58  
59  
60

1  
2  
3  
4  
5  
6 hard metal lung diseases due to occupational history and pathological findings, but 3  
7  
8 cases were excluded because tungsten or cobalt were not detected in the lung tissue.  
9  
10 Nineteen patients were finally diagnosed as hard metal lung disease because of presence  
11  
12 of tungsten in lung specimens detected by EPMA-WDS. In 4 of 19 patients, the  
13  
14 presence of tungsten, cobalt, or tantalum was not known in the first place and proved by  
15  
16 element analysis at the meeting.  
17  
18  
19

20 Occupational history and clinical features are summarized in Table 1 and 2.  
21  
22 Demographic findings in 6 of these patients have been reported previously (case 2, 5, 7,  
23  
24 8, 10, and 16 corresponding to case 1, 3, 5, 6, 14, and 16 in 2007 report,  
25  
26 respectively).[7] All the subjects had an occupational history of hard metal industry  
27  
28 for 1 to 36 years. One patient (case 15) was doing deskwork in an insufficiently  
29  
30 ventilated room of a hard metal grinding company. Five patients had occupational  
31  
32 history of hard metal industry but were not exposed at the diagnosis of hard metal lung  
33  
34 disease. The delay between cessation of exposure and biopsy in the patients were 5  
35  
36 years, 4 months, 2 months, and 6 months for case 1, 2, 8, and 14, respectively. Case 10  
37  
38 had worked as a metal grinder for 6 years and then as a chimney cleaner at a copper  
39  
40 mine for 32 years. He visited a hospital complaining of dry cough after 32-year work  
41  
42 as a chimney cleaner and was finally diagnosed as hard metal lung diseases 4 years later  
43  
44 by surgical biopsy. Five patients (case 2, 5, 7, 8, and 15) had an allergic history and  
45  
46 were patch tested for Co, Ni, Cr, Hg, Au, Zn, Mn, Ag, Pd, Pt, Sn, Cu, Fe, Al, In, Ir, Ti.  
47  
48 4 of 5 patients who had undergone patch testing (case 2, 5, 7, and 15) were found to be  
49  
50 positive for cobalt. Pulmonary function tests revealed restrictive lung defect  
51  
52  
53  
54  
55  
56  
57  
58  
59  
60

characterized by reduced vital capacity and lung diffusing capacity. BAL findings showed increased total cell counts, increased lymphocytes and eosinophils, with normal CD4/CD8 ratio. Bizarre multinucleated giant cells were noted in 3 patients.

**Table 1. Demographic features of subjects**

| Case | Age | Sex | Smoking history | Occupational history (hard metal exposure) | Exposure (y/m) start/duration | Bx year | Exposure at Dx |
|------|-----|-----|-----------------|--------------------------------------------|-------------------------------|---------|----------------|
| 1    | 39  | M   | non             | Hard metal shaping/drilling                | 2000/12                       | 2006    | No             |
| 2    | 53  | M   | ex              | Hard metal shaping/drilling                | 2002/30                       | 2002    | No             |
| 3    | 21  | M   | non             | Metal grinding                             | 2005/32                       | 2008    | Yes            |
| 4    | 42  | M   | ex              | Hard metal shaping/drilling                | 2005/36                       | 2009    | Yes            |
| 5    | 48  | M   | non             | Metal grinding                             | 2000/48                       | 2004    | NA             |
| 6    | 45  | M   | non             | Hard metal shaping/drilling                | 1982/60                       | 1987    | Yes            |
| 7    | 32  | F   | non             | Metal grinding                             | 1988/60                       | 1993    | Yes            |
| 8    | 32  | F   | non             | Metal grinding                             | 1997/72                       | 2003    | No             |
| 9    | 44  | F   | non             | Hard metal shaping/drilling                | 1990/72                       | 1996    | Yes            |
| 10   | 62  | M   | non             | Metal grinding                             | 1963/72                       | 2003    | No             |
| 11   | 40  | F   | non             | Hard metal shaping/drilling                | 1997/96                       | 2005    | NA             |
| 12   | 48  | M   | non             | Metal grinding                             | 1981/120                      | 1992    | NA             |
| 13   | 49  | F   | non             | Hard metal shaping/drilling                | 1999/120                      | 2009    | Yes            |
| 14   | 65  | F   | non             | Metal grinding                             | 1988/144                      | 2000    | No             |
| 15   | 50  | F   | non             | Desk worker in hard metal factory          | 1985/168                      | 1996    | Yes            |
| 16   | 53  | M   | non             | Quality control of hard metals             | 1974/264                      | 2001    | NA             |
| 17   | 60  | M   | ex              | Hard metal shaping/drilling                | 1972/276                      | 1995    | Yes            |
| 18   | 53  | M   | non             | Hard metal shaping/drilling                | 1971/372                      | 2005    | Yes            |
| 19   | 65  | M   | non             | Hard metal shaping/drilling                | 1963/444                      | 2008    | Yes            |

Abbreviation; Bx, biopsy; Dx, diagnosis; NA, not available.

**Table 2. Clinical characteristics of Patients with Hard metal lung disease**

|                              |                       | Value                             |
|------------------------------|-----------------------|-----------------------------------|
| Mean age at diagnosis (yrs)  |                       | 46.4 ± 14.1 (21 - 65)             |
| Gender                       | M/F                   | 12/7                              |
| Smoking history              | Cur/Ex/Never          | 0/3/16                            |
| Chief complaints             | dry cough             | 13/19                             |
|                              | breath shortness      | 8/19                              |
| Pneumothorax                 | Yes                   | 8/19                              |
| Allergic history             | Yes                   | 5/19                              |
| Patch test to cobalt         | positive              | 4/5                               |
| Mean exposure duration (yrs) |                       | 10.7 ± 10.3 (1 - 36)              |
| Physical findings            | rales on auscultation | 11/19                             |
|                              | fine crackles         | 8/19                              |
|                              | finger clubbing       | 4/18                              |
|                              | edema of leg          | 1/16                              |
| Laboratory tests             | KL-6                  | 502.7 ± 267.5 U/ml                |
|                              | SP-D                  | 216.1 ± 192.4 ng/ml               |
| Pulmonary function tests     |                       |                                   |
|                              | %VC                   | 64.8 ± 25.3 %                     |
|                              | FEV <sub>1</sub> %    | 85.6 ± 10.7 %                     |
|                              | %DLco                 | 53.4 ± 17.0 %                     |
| Bronchoalveolar lavage       |                       |                                   |
|                              | Total cell count      | 3.13 ± 2.11 × 10 <sup>5</sup> /ml |
|                              | Lymphocytes           | 24.3 ± 22.3 %                     |
|                              | Neutrophils           | 3.07 ± 2.86 %                     |
|                              | Eosinophils           | 3.01 ± 5.03 %                     |
|                              | CD4/8 ratio           | 1.65 ± 2.96                       |

The mean numbers ± standard deviations and ranges in parentheses are shown.

Abbreviation; KL-6, Krebs von den Lungen 6; SP-D, surfactant protein D; VC, vital capacity; FEV<sub>1</sub>, Forced expiratory volume in 1 second; DLco, Carbon monoxide diffusing capacity

### Radiological findings

HRCT of all patients except one with hard metal lung disease were available for review of radiological findings. Conventional CT findings of case 12 were added to the table (Table 3). Centrilobular nodules (Fig 1 A, B) and ground glass opacity were identified in chest CT of 16 patients. In some patients, reticular opacities, traction bronchiectasis, and subpleural curvilinear opacities were also present (Fig 1 C, D). Although centrilobular micronodular opacities were noted in those patients, they were **not predominant**.



**Table 3. Radiologic findings of patients with hard metal lung disease**

| Case | CT features |     |                    | radiological diagnosis                                           |                                             |
|------|-------------|-----|--------------------|------------------------------------------------------------------|---------------------------------------------|
|      | CL nodules  | GGO | PTx other findings |                                                                  |                                             |
| 1    | +           | -   | -                  | bronchial wall thickening                                        | bronchitis (DPB like)                       |
| 2    | +           | +   | -                  | reticular opacities                                              | chronic IP, NOS (NSIP or UIP)               |
| 3    | +           | +   | +                  |                                                                  | subacute HP                                 |
| 4    | +           | -   | +                  | subpleural curvilinear opacities                                 | subacute HP                                 |
| 5    | +           | +   | -                  |                                                                  | subacute HP                                 |
| 6    | -           | +   | -                  | reticular opacities, consolidation                               | Interstitial pneumonia NOS                  |
| 7    | +           | +   | +                  |                                                                  | subacute HP                                 |
| 8    | +           | +   | -                  | traction bronchiectasis                                          | subacute HP                                 |
| 9    | +           | +   | -                  |                                                                  | subacute HP                                 |
| 10   | +           | +   | -                  | reticular opacities                                              | UIP                                         |
|      |             |     |                    | traction bronchiectasis                                          |                                             |
| 11   | +           | -   | +                  |                                                                  | subacute HP                                 |
| 12   | +           | +   | +                  | subpleural curvilinear opacities                                 | chronic HP                                  |
| 13   | +           | +   | -                  |                                                                  | subacute HP                                 |
| 14   | +           | +   | -                  | traction bronchiectasis, apical cap                              | chronic HP                                  |
| 15   | +           | +   | +                  | traction bronchiectasis                                          | subacute HP                                 |
| 16   | -           | +   | +                  | subpleural/peribronchovascular consolidation, atelectasis, bulla | upper lobe predominant IP or chronic IP NOS |
| 17   | +           | +   | -                  | bulla, centrilobular emphysema                                   | UIP                                         |
| 18   | -           | +   | -                  | reticular opacities                                              | chronic IP, NOS (NSIP or UIP)               |
| 19   | +           | +   | -                  | reticular opacities                                              | chronic HP                                  |

Abbreviation; CL, centrilobular; GGO, ground-glass opacities; PTx, pneumothorax; DPB, diffuse panbronchiolitis; IP, interstitial pneumonia; NOS, not otherwise specified; NSIP, non-specific interstitial pneumonia; UIP, usual interstitial pneumonia; HP, hypersensitivity pneumonitis

### Pathological findings and elemental analysis

Pathological findings and detected elements in lung tissue of 19 cases were summarized in Table 4. Four major histological features noted in this study were as follows: GIP

1  
2  
3  
4  
5  
6 characterized with centrilobular fibrosis (Fig 2 A, B) and characteristic giant cells  
7  
8 showing cannibalism (Fig 2 C), centrilobular inflammation/fibrosis similar to GIP but  
9  
10 without giant cells, UIP pattern characterized with patchy distribution and temporal  
11  
12 heterogeneity, and dense fibrosis with fibroblastic foci (Fig 3 A, B, D, E, F) [12], upper  
13  
14 lobe fibrosis characterized with apical scar/cap type fibrosis mainly in the upper  
15  
16 lobe.[13] In the case of upper lobe fibrosis, biopsy specimen contained apical cap-like  
17  
18 subpleural dense fibrosis which was composed of airspace fibrosis (intraluminal  
19  
20 organization) with collapse and increased elastic framework. In autopsy taken 4 years  
21  
22 later, we recognized remarkable subpleural elastosis with a few of cannibalistic giant  
23  
24 cells.  
25  
26  
27  
28  
29

30  
31 Elemental analyses of lung specimens of GIP and centrilobular  
32  
33 inflammation/fibrosis demonstrated that tungsten was mapped almost throughout the  
34  
35 centrilobular fibrotic areas (Fig 2 D, E). Analyses of lung specimens of UIP pattern by  
36  
37 EPMA-WDS revealed that tungsten and tantalum were distributed in periarteriolar area  
38  
39 (Fig 4, D, E) and in subpleural fibrosis with dense acellular collagen (Fig 4 G, H, J, K).  
40  
41 However, these elements were not accompanied by centrilobular inflammation/fibrosis  
42  
43 (Fig 4, A, B). Lung histopathology in one case showed apical cap-like fibrosis with  
44  
45 tungsten deposits detected in the fibrotic region but without GIP.[14] In total,  
46  
47 elemental analysis by EPMA-WDS detected tungsten but no cobalt or tantalum in 10  
48  
49 patients, tungsten and cobalt in 5 patients, and tungsten and tantalum in 4 patients  
50  
51 (Table 4).  
52  
53  
54  
55  
56  
57  
58  
59  
60

**Table 4. Pathological findings and elemental analysis of patients with hard metal lung disease**

| Case | sampling      |                | pathological findings               | elements detected |    |    |
|------|---------------|----------------|-------------------------------------|-------------------|----|----|
|      | method        | site(s)        |                                     | W                 | Co | Ta |
| 1    | VATS          | rt. S5/S8      | centrilobular inflammation/fibrosis | +                 | -  | -  |
| 2    | VATS          | lt. S2/S9      | GIP                                 | +                 | -  | -  |
| 3    | TBB/VATS      | rt. apex       | GIP                                 | +                 | -  | -  |
| 4    | VATS          | rt. S9         | centrilobular inflammation/fibrosis | +                 | -  | -  |
| 5    | VATS          | rt. S4/S9      | GIP                                 | +                 | -  | -  |
| 6    | Autopsy       | NA             | GIP, DAD                            | +                 | -  | -  |
| 7    | VATS          | rt. S8         | centrilobular inflammation/fibrosis | +                 | +  | -  |
| 8    | VATS          | rt. S4/S6      | GIP                                 | +                 | -  | +  |
| 9    | VATS          | rt. S2/S6      | GIP                                 | +                 | +  | -  |
| 10   | VATS          | lt. S1+2/S10   | UIP, GIP                            | +                 | -  | +  |
| 11   | VATS          | lt. S1+2/S9    | GIP                                 | +                 | +  | -  |
| 12   | Autopsy       | NA             | GIP, DAD                            | +                 | -  | -  |
| 13   | VATS          | lt. S1+2/S6    | GIP                                 | +                 | -  | -  |
| 14   | VATS          | lt. S4/S9      | GIP, UIP/NSIP?                      | +                 | -  | +  |
| 15   | VATS          | rt. S6         | GIP                                 | +                 | +  | -  |
| 16   | VATS/autopsy  | lt. S1+2/whole | upper lobe fibrosis                 | +                 | -  | +  |
| 17   | TBB/Lobectomy | -/RLL          | UIP                                 | +                 | -  | -  |
| 18   | VATS          | lt. S1+2/S9    | UIP                                 | +                 | +  | -  |
| 19   | VATS          | rt. S3/S10     | UIP, centrilobular fibrosis         | +                 | -  | +  |

Abbreviation; TBB, trans-bronchial biopsy; VATS, video-assisted thoracic surgery; GIP, giant cell interstitial pneumonia; NA, not available; RLL, right lower lobectomy; DAD, diffuse alveolar damage; UIP, usual interstitial pneumonia; NSIP, non-specific interstitial pneumonia

### Comparison of clinical features

We then classified the patients with hard metal lung disease into two groups according to their pathological findings. We grouped GIP and centrilobular inflammation/fibrosis together, because the latter pattern was considered to be a variant

of GIP due to the similar distribution of lesions. One patient was pathologically diagnosed as upper lobe fibrosis. It has such characteristic findings of subpleural, zonal, rather well defined fibrosis with small cysts and honeycomb lesions similar to that of UIP pattern that we grouped UIP pattern and upper lobe fibrosis together and named them the fibrosis group. We then compared clinical features between the GIP group and the fibrosis group. The GIP group was younger, had shorter exposure duration, lower serum KL-6, and higher lymphocyte percentage in BAL fluid compared with the fibrosis group (Table 5).

**Table 5. Comparison of clinical features between GIP group and fibrosis group**

|                                         | GIP group<br>(n=14) | Fibrosis group<br>(n=5) | p-value |
|-----------------------------------------|---------------------|-------------------------|---------|
| Age (yrs)                               | 43.1 ± 10.8         | 58.6 ± 5.41             | 0.007   |
| Gender (M/F)                            | 7/7                 | 5/0                     | 0.106   |
| Exposure duration (months)              | 73.0 ± 48.8         | 285.6 ± 140.3           | 0.007   |
| Pneumothorax (+/-)                      | 6/8                 | 2/3                     | 1.000   |
| KL-6 (U/ml)                             | 398.7 ± 189.4       | 710.8 ± 297.7           | 0.023   |
| SP-D (ng/ml)                            | 260.3 ± 257.5       | 161.0 ± 54.75           | 0.903   |
| PaO <sub>2</sub> (Torr)                 | 84.3 ± 14.3         | 84.4 ± 11.2             | 0.922   |
| PaCO <sub>2</sub> (Torr)                | 42.8 ± 2.75         | 56.0 ± 34.6             | 0.657   |
| %VC (%)                                 | 64.4 ± 27.1         | 65.5 ± 24.1             | 0.734   |
| FEV <sub>1</sub> (%)                    | 85.4 ± 12.9         | 86.1 ± 2.62             | 0.910   |
| %DLco (%)                               | 50.8 ± 16.7         | 57.2 ± 18.8             | 0.371   |
| Bronchoalveolar lavage                  |                     |                         |         |
| Total cell count (×10 <sup>5</sup> /ml) | 3.52 ± 2.41         | 2.26 ± 0.96             | 0.395   |
| Lymphocytes (%)                         | 31.5 ± 23.0         | 8.40 ± 9.08             | 0.015   |
| CD4/8 ratio                             | .76 ± 0.51          | 3.22 ± 4.85             | 0.298   |

Abbreviation; KL-6, Krebs von den Lungen 6; SP-D, surfactant protein D; VC, vital capacity; FEV<sub>1</sub>, Forced expiratory volume in 1 second; DLco, Carbon monoxide diffusing capacity

## DISCUSSION

Pathological features of GIP are interstitial pneumonia with centrilobular fibrosis with multinucleated giant cells in the airspaces.[15] Sometimes centrilobular inflammation/fibrosis is only noted with few giant cells. EPMA-WDS analysis of lung tissue of hard metal lung disease demonstrated that tungsten was distributed in a relatively high concentration almost throughout the centrilobular fibrosis and in giant cells.[7] Comparison of distribution of inflammatory cells and tungsten suggested that inhaled hard metal elements were associated with centrilobular inflammation/fibrosis by CD163<sup>+</sup> macrophages in cooperation with CD8<sup>+</sup> lymphocytes. Thus, centrilobular inflammation/fibrosis without giant cells should also be a variant of hard metal lung disease. GIP was also found in Belgian diamond polishers exposed not to hard metal dust, but to cobalt-containing dust, which confirmed that cobalt plays a dominant role in hard metal lung disease.[16] Cobalt is a well-known skin sensitizer, causing allergic contact dermatitis, and it can also cause occupational asthma.[17] Four patients were positive for patch testing for cobalt. Although such patch testing has been claimed to carry some risk of aggravation of disease in the situation with beryllium, cobalt is included in the routine metal allergy test panel and caused no worsening of hard metal lung disease. **Hard metal lung disease cases show features of hypersensitivity pneumonitis (HP) with small interstitial granulomas, although well formed granulomas as in chronic beryllium disease are very rarely seen in the disease or HP. These data suggest that allergic inflammation may be different between hard metal lung disease/HP and berylliosis.**

1  
2  
3  
4  
5  
6 Respiratory symptoms of hard metal lung diseases sometimes improve on holidays  
7  
8 and exacerbate during workdays, which resemble those of HP. Histopathology  
9  
10 findings in HP may also include centrilobular fibrosis in association with isolated giant  
11  
12 cells.[18] However, they do not show cannibalism as those in hard metal lung disease.  
13  
14 BAL is the most sensitive tool to detect HP: a marked lymphocytosis with decreased  
15  
16 CD4/8 ratio is characteristic of BAL findings.[19] BAL findings of patients with hard  
17  
18 metal lung disease show increased total cell counts with increased lymphocytes and  
19  
20 decreased CD4/CD8 ratio.[4, 20-22] Reduced CD4/8 ratio is consistent with the  
21  
22 findings of immunohistochemistry in the previous study.[7] In this study, we found  
23  
24 that lymphocyte percentage in BAL fluid was increased with rather low CD4/8 ratio in  
25  
26 the GIP group, but they were not recognized in fibrosis group.  
27  
28  
29  
30  
31

32  
33 UIP pattern is the pathological abnormality associated with various restrictive lung  
34  
35 diseases, including idiopathic pulmonary fibrosis (IPF). Interstitial inflammation and  
36  
37 fibrosis in UIP pattern does not usually involve centrilobular area and peribronchioles.  
38  
39 Three cases who were pathologically diagnosed as UIP pattern also had centrilobular  
40  
41 micronodular opacities in HRCT findings. One patient was pathologically diagnosed  
42  
43 as UIP pattern and centrilobular fibrosis. Element analysis of the deposition in lung  
44  
45 tissues from patients with IPF/UIP usually demonstrates following elements; Si, Al, Fe,  
46  
47 and Ti with various degrees (unpublished data). While we found tungsten accumulated  
48  
49 in periarteriolar area and subpleural fibrosis in lung specimens of UIP pattern in this  
50  
51 study. However, tungsten in periarteriolar area was hardly associated with any fibrosis  
52  
53 or inflammatory cells. These results suggest that individual immune  
54  
55  
56  
57  
58  
59  
60

1  
2  
3  
4  
5  
6 susceptibility/response to inhaled hard metal elements may decide pathological patterns  
7  
8 of UIP, GIP, or their mixture in varying degrees. Patients develop hard metal lung  
9  
10 disease usually after mean exposure duration of more than 10 years. Although most  
11  
12 studies have found no relation between disease occurrence and length of occupational  
13  
14 exposure, individuals with increased susceptibility may develop hard metal lung disease  
15  
16 after relatively short and low levels of exposure. The GIP group was younger and had  
17  
18 shorter exposure duration suggesting that those who had UIP pattern were individuals  
19  
20 with decreased susceptibility. Upper lobe fibrosis was pathologically diagnosed in one  
21  
22 patient. Although it is significantly different from UIP pattern, tungsten in the fibrosis  
23  
24 was not associated with inflammation around the element, either. With regard to the  
25  
26 relationship between hard metal elements and surrounding inflammation, upper lobe  
27  
28 fibrosis looks similar to UIP pattern in the other cases.  
29  
30  
31  
32  
33

34  
35 Liebow first described GIP as a form of idiopathic interstitial pneumonia.[23] It is  
36  
37 now recognized that GIP is pathognomonic for hard metal lung disease.[24] Since  
38  
39 tungsten and cobalt are only observed within the lungs of subjects who have been  
40  
41 exposed to hard metals, the presence of tungsten and/or cobalt in BAL fluid or lung  
42  
43 specimens leads to a definite diagnosis of hard metal lung disease. According to the  
44  
45 results of elemental analyses in this study, five cases with UIP pattern or upper lobe  
46  
47 fibrosis should be diagnosed as hard metal lung disease. The pathological findings of  
48  
49 UIP pattern demonstrated no physical connection between centrilobular fibrosis and the  
50  
51 UIP area, dense fibrosis with fibroblastic foci. Since centrilobular fibrosis is usually  
52  
53 irreversible, if GIP evolved to UIP, sequels of centrilobular fibrosis would be somewhat  
54  
55  
56  
57  
58  
59  
60

1  
2  
3  
4  
5  
6 linked to peripheral UIP lesion. EPMA-WDS analyses of lung specimens of UIP  
7  
8 pattern revealed that tungsten and tantalum in periarteriolar area were not accompanied  
9  
10 by centrilobular inflammation/fibrosis as seen in typical GIP. In addition, clinical  
11  
12 features of the fibrosis group were different from those of the GIP group. We  
13  
14 identified tungsten in subpleural fibrosis with dense acellular collagen from UIP pattern  
15  
16 and in the fibrotic region from apical cap-like fibrosis. Fibrotic reactions of these  
17  
18 patients could have caused accumulation of hard metal particles as the scars contract  
19  
20 and cut off lymphatic drainage. Those who are not sensitive to hard metal elements,  
21  
22 particularly cobalt, might simply have idiopathic UIP or upper lobe fibrosis by accident  
23  
24 as everyone with interstitial lung disease and a history of asbestos exposure does not  
25  
26 have asbestosis.[25] However, microscopic findings of the lung specimen of UIP  
27  
28 pattern included mild centrilobular inflammation and multinucleated giant cells with  
29  
30 cannibalism, which could never been seen in idiopathic UIP/IPF. If we find tungsten  
31  
32 or cobalt in the biopsies of UIP/fibrosis from the subjects who worked in the hard-metal  
33  
34 industry, we cannot help but make a diagnosis of hard-metal lung disease. Given  
35  
36 present information, we only conclude that the UIP/fibrosis may be induced by hard  
37  
38 metal elements, or just a coincidence. Longitudinal data of the relative frequencies of  
39  
40 incidence of the two diseases, hard metal lung disease and IPF, allow us to infer the  
41  
42 likelihood of someone with hard metal exposure developing idiopathic UIP/IPF.  
43  
44  
45  
46  
47  
48  
49  
50

51  
52 Hard metal lung disease is caused by exposure to cobalt and tungsten carbide.  
53  
54 Toxicity stems from reactive oxygen species generation in a mechanism involving both  
55  
56 elements in mutual contact.[26] Inhaled cobalt and tungsten carbides may cause lung  
57  
58  
59  
60



1  
2  
3  
4  
5  
6 toxicity even in those who are less sensitive to those elements, which can result in lung  
7  
8 fibrosis with GIP features. Qualitative elemental analysis of fibrosing lesion in GIP  
9  
10 also demonstrated the presence of miscellaneous elements: Al, Si, Ti, Cr, and Fe, in  
11  
12 addition to tungsten, cobalt, and/or Ta.[7] Several sources of evidence suggest that  
13  
14 environmental agents may have an etiologic role in IPF. A meta-analysis of six  
15  
16 case-control studies demonstrated that six exposures including cigarette smoking,  
17  
18 agriculture/farming, livestock, wood dust, metal dust, and stone/sand were significantly  
19  
20 associated with IPF.[27] Metal dust must contain various metal elements. In an  
21  
22 EPMA analysis field of the lung biopsy specimen from upper lobe fibrosis, we found  
23  
24 tungsten scattered throughout the fibrosis as well as aluminum, silicon, and  
25  
26 titanium.[14] Miscellaneous metal dust inhaled in addition to tungsten and cobalt may  
27  
28 cause UIP pattern in less sensitive individuals.  
29  
30  
31  
32  
33  
34  
35  
36

### 37 **Acknowledgement**

38  
39 The authors thank the following doctors for the supply of cases: Dr. Y. Endo from  
40  
41 Nagaoka Chuo General Hospital, Dr. M. Amano and Dr. S. Aoki from Showa General  
42  
43 Hospital, Dr. T. Ishiguro from Gifu Municipal Hospital, Dr. M. Sakai from Saga Social  
44  
45 Insurance Hospital, Dr. M. Tajiri from Kurume University, Dr T. Ishida from Niigata  
46  
47 Prefectural Central Hospital, Dr. K. Koreeda from Minami Kyusyu National Hospital,  
48  
49 Dr. K. Okuno from Kasai City Hospital, Dr. Y. Shimaoka from Nagaoka Red Cross  
50  
51 Hospital, Dr. K. Kashiwada from Nippon Medical School, Dr. T. Sawada and Dr. A.  
52  
53 Shiihara from Kanagawa Cardiovascular and Respiratory Center, Dr. K. Tachibana from  
54  
55  
56  
57  
58  
59  
60

1  
2  
3  
4  
5  
6 National Hospital Organization Kinki-chuo Chest Medical Center, Dr. T. Azuma from  
7  
8 Shinshu University, Dr. K. Hara and Dr. T. Ishihara from NTT east corporation Kanto  
9  
10 Medical Center, Dr. Y. Waseda from Kanazawa University, Dr. H. Ishii from Oita  
11  
12 University, Dr. H. Matsuoka from Osaka Prefectural Medical Center for Respiratory and  
13  
14 Allergic Diseases, Dr. A Hara from Nagasaki University, Dr. O. Hisata from Tohoku  
15  
16 University, and Dr. H. Tokuda from Social Insurance Chuo General Hospital. The  
17  
18 authors also would like to acknowledge Dr. Kouichi Watanabe and Mr. Masayoshi  
19  
20 Kobayashi of EPMA Laboratory, Center of Instrumental Analysis, Niigata University,  
21  
22 who contributed to elemental analysis of lung specimens.  
23  
24  
25  
26  
27  
28  
29  
30  
31  
32  
33  
34  
35  
36  
37  
38  
39  
40  
41  
42  
43  
44  
45  
46  
47  
48  
49  
50  
51  
52  
53  
54  
55  
56  
57  
58  
59  
60

## References

1. Nemery B. Metal toxicity and the respiratory tract. *Eur Respir J*. 1990;**3**:202-19.
2. Kelleher P, Pacheco K, Newman LS. Inorganic dust pneumonias: the metal-related parenchymal disorders. *Environmental health perspectives*. 2000;**108 Suppl 4**:685-96.
3. Takada T, Moriyama H. Hard Metal Lung Disease. In: Huang Y-CT, Ghio AJ, Maier LA, editors. *A Clinical Guide to Occupational and Environmental Lung Diseases Respiratory Medicine*. New York: Springer; 2012. p. 217-30.
4. Davison AG, Haslam PL, Corrin B et al. Interstitial lung disease and asthma in hard-metal workers: bronchoalveolar lavage, ultrastructural, and analytical findings and results of bronchial provocation tests. *Thorax*. 1983;**38**:119-28.
5. Cugell DW. The hard metal diseases. *Clin Chest Med*. 1992;**13**:269-79.
6. Anttila S, Sutinen S, Paananen M et al. Hard metal lung disease: a clinical, histological, ultrastructural and X-ray microanalytical study. *Eur J Respir Dis*. 1986;**69**:83-94.
7. Moriyama H, Kobayashi M, Takada T et al. Two-dimensional analysis of elements and mononuclear cells in hard metal lung disease. *Am J Respir Crit Care Med*. 2007;**176**:70-7.
8. Ohori NP, Sciruba FC, Owens GR et al. Giant-cell interstitial pneumonia and hard-metal pneumoconiosis. A clinicopathologic study of four cases and review of the literature. *Am J Surg Pathol*. 1989;**13**:581-7.
9. Travis WD, Matsui K, Moss J et al. Idiopathic nonspecific interstitial pneumonia: prognostic significance of cellular and fibrosing patterns: survival comparison with

1  
2  
3  
4  
5  
6 usual interstitial pneumonia and desquamative interstitial pneumonia. *Am J Surg Pathol*.

7  
8 2000;**24**:19-33.

9  
10 10. Katzenstein AL, Myers JL. Idiopathic pulmonary fibrosis: clinical relevance of  
11 pathologic classification. *Am J Respir Crit Care Med*. 1998;**157**:1301-15.

12  
13 11. Moriyama H, Yamamoto T, Takatsuka H et al. Expression of macrophage  
14 colony-stimulating factor and its receptor in hepatic granulomas of  
15 Kupffer-cell-depleted mice. *Am J Pathol*. 1997;**150**:2047-60.

16  
17 12. American Thoracic Society. Idiopathic pulmonary fibrosis: diagnosis and treatment.  
18 International consensus statement. American Thoracic Society (ATS), and the European  
19 Respiratory Society (ERS). *Am J Respir Crit Care Med*. 2000;**161**:646-64.

20  
21 13. Shiota S, Shimizu K, Suzuki M et al. [Seven cases of marked pulmonary fibrosis in  
22 the upper lobe]. *Nihon Kokyuki Gakkai Zasshi*. 1999;**37**:87-96.

23  
24 14. Kaneko Y, Kikuchi N, Ishii Y et al. Upper lobe-dominant pulmonary fibrosis  
25 showing deposits of hard metal component in the fibrotic lesions. *Intern Med*.  
26 2010;**49**:2143-5.

27  
28 15. Naqvi AH, Hunt A, Burnett BR et al. Pathologic spectrum and lung dust burden in  
29 giant cell interstitial pneumonia (hard metal disease/cobalt pneumonitis): review of 100  
30 cases. *Arch Environ Occup Health*. 2008;**63**:51-70.

31  
32 16. Demedts M, Gheysens B, Nagels J et al. Cobalt lung in diamond polishers. *The*  
33  
34  
35  
36  
37  
38  
39  
40  
41  
42  
43  
44  
45  
46  
47  
48  
49  
50  
51  
52  
53  
54  
55  
56  
57  
58  
59  
60  
*American review of respiratory disease*. 1984;**130**:130-5.

17. Nemery B, Verbeken EK, Demedts M. Giant cell interstitial pneumonia (hard metal  
lung disease, cobalt lung). *Semin Respir Crit Care Med*. 2001;**22**:435-48.

- 1  
2  
3  
4  
5  
6 18. Churg A, Muller NL, Flint J et al. Chronic hypersensitivity pneumonitis. *Am J Surg*  
7  
8 *Pathol.* 2006;**30**:201-8.  
9
- 10 19. D'Ippolito R, Chetta A, Foresi A et al. Induced sputum and bronchoalveolar lavage  
11  
12 from patients with hypersensitivity pneumonitis. *Respir Med.* 2004;**98**:977-83.  
13
- 14 20. Okuno K, Kobayashi K, Kotani Y et al. A case of hard metal lung disease  
15  
16 resembling a hypersensitive pneumonia in radiological images. *Intern Med.*  
17  
18 2010;**49**:1185-9.  
19
- 20 21. Kakugawa T, Mukae H, Nagata T et al. Giant cell interstitial pneumonia in a  
21  
22 15-year-old boy. *Intern Med.* 2002;**41**:1007-12.  
23
- 24 22. Forni A. Bronchoalveolar lavage in the diagnosis of hard metal disease. *Sci Total*  
25  
26 *Environ.* 1994;**150**:69-76.  
27
- 28 23. Liebow AA. Definition and classification of interstitial pneumonias in human  
29  
30 pathology. *Prog Respir Res.* 1975:1-33.  
31
- 32 24. Abraham JL, Burnett BR, Hunt A. Development and use of a pneumoconiosis  
33  
34 database of human pulmonary inorganic particulate burden in over 400 lungs. *Scanning*  
35  
36 *Microsc.* 1991;**5**:95-104; discussion 5-8.  
37
- 38 25. Gaensler EA, Jederlinic PJ, Churg A. Idiopathic pulmonary fibrosis in  
39  
40 asbestos-exposed workers. *The American review of respiratory disease.*  
41  
42 1991;**144**:689-96.  
43
- 44 26. Fubini B. Surface reactivity in the pathogenic response to particulates.  
45  
46 *Environmental health perspectives.* 1997;**105 Suppl 5**:1013-20.  
47
- 48 27. Taskar VS, Coultas DB. Is idiopathic pulmonary fibrosis an environmental disease?  
49  
50  
51  
52  
53  
54  
55  
56  
57  
58  
59  
60

1  
2  
3  
4  
5  
6  
7  
8  
9  
10  
11  
12  
13  
14  
15  
16  
17  
18  
19  
20  
21  
22  
23  
24  
25  
26  
27  
28  
29  
30  
31  
32  
33  
34  
35  
36  
37  
38  
39  
40  
41  
42  
43  
44  
45  
46  
47  
48  
49  
50  
51  
52  
53  
54  
55  
56  
57  
58  
59  
60

*Proc Am Thorac Soc.* 2006;3:293-8.

For peer review only

## FIGURE LEGENDS

### Figure 1

High-resolution computed tomography of the chest illustrating differences in the radiographic appearance of the lungs in giant cell interstitial pneumonia (GIP) and in usual interstitial pneumonia (UIP) pattern. (A, B) In GIP of case 9, centrilobular micronodular opacities pathologically correspond to centrilobular fibrosis and giant cell accumulation within the alveolar space. (C, D) In UIP pattern of case 10, reticular opacities and traction bronchiectasis are present with centrilobular micronodular opacities.

### Figure 2

Representative images of light microscopic findings and electron probe microanalyser with wavelength dispersive spectrometer (EPMA-WDS) of S6 specimen from case 9 pathologically diagnosed as giant cell interstitial pneumonia. (A, B, and C) The black square area in centrilobular fibrosis is stepwise magnified to show multinucleated giant cells with cannibalism. (A, D) The green square area in subpleural zone is elementally analyzed by EPMA-WDS to show (E) many orange spots corresponding to tungsten. A qualitative colored image of tungsten distribution is superimposed onto a lung tissue image of amino nitrogen colored green. Note that tungsten is widely distributed in centrilobular fibrosis as well as surrounding alveolar walls. Original magnification, (A) panoramic view, (B) x 4, (C) x 60, and (D) x 8.

**Figure 3**

Representative images of light microscopic findings of lung specimen from case 10 with hard metal lung disease pathologically diagnosed as usual interstitial pneumonia pattern. (A, B) A low magnification view of left S1+2 specimen demonstrates a combination of patchy interstitial fibrosis with alternating areas of normal lung and architectural alteration due to chronic scarring or honeycomb change. Note that there are several small bronchioles with mild centrilobular inflammation (blue arrows). (B, C) Multinucleated giant cells with cannibalism are also shown in a stepwise-magnified black square area located in subpleural fibrosis. (D, E, F) Left S10 specimen from the same patient also shows characteristic fibroblastic foci (black arrows) in the background of dense acellular collagen in a stepwise-magnified square area located in subpleural fibrosis. Original magnification, (A, D) panoramic view, (B) x 2, (C) x 40, (E) x 4 and (F) x 20.

**Figure 4**

Representative images of light micrographs and electron probe microanalyser with wavelength dispersive spectrometer (EPMA-WDS) of lung specimen from case 10 with hard metal lung disease pathologically diagnosed as usual interstitial pneumonia pattern (A). (B, C) An arteriole and its surrounding interstitium (orange square) are elementally analyzed by EPMA-WDS to demonstrate that (D) tungsten and (E) tantalum are distributed in periarteriolar area with little fibrosis. Elemental analysis by EPMA-WDS of subpleural fibrosis with dense acellular collagen (green square in B, F,



1  
2  
3  
4  
5  
6 I) also shows (G, J) tungsten and (H, K) tantalum almost randomly distributed in  
7  
8 magnified images (yellow squares in G and H are magnified to show (J) tungsten and  
9  
10 (K) tantalum). We did not further analyze the centrilobular pattern or the cannibalistic  
11  
12 giant cells shown in Fig 3. Note that the distribution of tungsten is not completely the  
13  
14 same as that of tantalum. Original magnification, (A) panoramic view and (B) x 4.  
15  
16 Scale bars for the magnification and scan areas for (E), (H), and (K) correspond to  
17  
18 100 $\mu$ m (0.768 x 0.768 mm), 200 $\mu$ m (1.536 x 1.536 mm), and 25 $\mu$ m (0.1792 x 0.1792  
19  
20 mm), respectively.  
21  
22  
23  
24  
25  
26  
27  
28  
29  
30  
31  
32  
33  
34  
35  
36  
37  
38  
39  
40  
41  
42  
43  
44  
45  
46  
47  
48  
49  
50  
51  
52  
53  
54  
55  
56  
57  
58  
59  
60

## STROBE Statement—checklist of items that should be included in reports of observational studies

|                                        | Item No | Recommendation                                                                                                                                                                                                                                                                                                                                                                                                                                                                                                                                                                                                                                                                                   |
|----------------------------------------|---------|--------------------------------------------------------------------------------------------------------------------------------------------------------------------------------------------------------------------------------------------------------------------------------------------------------------------------------------------------------------------------------------------------------------------------------------------------------------------------------------------------------------------------------------------------------------------------------------------------------------------------------------------------------------------------------------------------|
| <b>Title and abstract</b><br>p. 1, 3-4 | 1       | (a) Indicate the study's design with a commonly used term in the title or the abstract<br>(b) Provide in the abstract an informative and balanced summary of what was done and what was found                                                                                                                                                                                                                                                                                                                                                                                                                                                                                                    |
| <b>Introduction</b>                    |         |                                                                                                                                                                                                                                                                                                                                                                                                                                                                                                                                                                                                                                                                                                  |
| Background/rationale<br>p. 5           | 2       | Explain the scientific background and rationale for the investigation being reported                                                                                                                                                                                                                                                                                                                                                                                                                                                                                                                                                                                                             |
| Objectives, p. 5                       | 3       | State specific objectives, including any prespecified hypotheses                                                                                                                                                                                                                                                                                                                                                                                                                                                                                                                                                                                                                                 |
| <b>Methods</b>                         |         |                                                                                                                                                                                                                                                                                                                                                                                                                                                                                                                                                                                                                                                                                                  |
| Study design, p.6                      | 4       | Present key elements of study design early in the paper                                                                                                                                                                                                                                                                                                                                                                                                                                                                                                                                                                                                                                          |
| Setting, p.6                           | 5       | Describe the setting, locations, and relevant dates, including periods of recruitment, exposure, follow-up, and data collection                                                                                                                                                                                                                                                                                                                                                                                                                                                                                                                                                                  |
| Participants, p.6                      | 6       | (a) <i>Cohort study</i> —Give the eligibility criteria, and the sources and methods of selection of participants. Describe methods of follow-up<br><i>Case-control study</i> —Give the eligibility criteria, and the sources and methods of case ascertainment and control selection. Give the rationale for the choice of cases and controls<br><i>Cross-sectional study</i> —Give the eligibility criteria, and the sources and methods of selection of participants<br>(b) <i>Cohort study</i> —For matched studies, give matching criteria and number of exposed and unexposed<br><i>Case-control study</i> —For matched studies, give matching criteria and the number of controls per case |
| Variables, p.6                         | 7       | Clearly define all outcomes, exposures, predictors, potential confounders, and effect modifiers. Give diagnostic criteria, if applicable                                                                                                                                                                                                                                                                                                                                                                                                                                                                                                                                                         |
| Data sources/<br>measurement,<br>p.6-8 | 8*      | For each variable of interest, give sources of data and details of methods of assessment (measurement). Describe comparability of assessment methods if there is more than one group                                                                                                                                                                                                                                                                                                                                                                                                                                                                                                             |
| Bias, p.6                              | 9       | Describe any efforts to address potential sources of bias                                                                                                                                                                                                                                                                                                                                                                                                                                                                                                                                                                                                                                        |
| Study size, p. 8, 9                    | 10      | Explain how the study size was arrived at                                                                                                                                                                                                                                                                                                                                                                                                                                                                                                                                                                                                                                                        |
| Quantitative variables,<br>p. 18       | 11      | Explain how quantitative variables were handled in the analyses. If applicable, describe which groupings were chosen and why                                                                                                                                                                                                                                                                                                                                                                                                                                                                                                                                                                     |
| Statistical methods, p. 8              | 12      | (a) Describe all statistical methods, including those used to control for confounding<br>(b) Describe any methods used to examine subgroups and interactions<br>(c) Explain how missing data were addressed<br>(d) <i>Cohort study</i> —If applicable, explain how loss to follow-up was addressed<br><i>Case-control study</i> —If applicable, explain how matching of cases and controls was addressed<br><i>Cross-sectional study</i> —If applicable, describe analytical methods taking account of sampling strategy<br>(e) Describe any sensitivity analyses                                                                                                                                |

Continued on next page

**Results**

|                            |     |                                                                                                                                                                                                                                                                                                                                                                                                               |
|----------------------------|-----|---------------------------------------------------------------------------------------------------------------------------------------------------------------------------------------------------------------------------------------------------------------------------------------------------------------------------------------------------------------------------------------------------------------|
| Participants,<br>p. 8, 9   | 13* | (a) Report numbers of individuals at each stage of study—eg numbers potentially eligible, examined for eligibility, confirmed eligible, included in the study, completing follow-up, and analysed<br>(b) Give reasons for non-participation at each stage<br>(c) Consider use of a flow diagram                                                                                                               |
| Descriptive data,<br>p. 10 | 14* | (a) Give characteristics of study participants (eg demographic, clinical, social) and information on exposures and potential confounders<br>(b) Indicate number of participants with missing data for each variable of interest<br>(c) <i>Cohort study</i> —Summarise follow-up time (eg, average and total amount)                                                                                           |
| Outcome data,<br>p. 12     | 15* | <i>Cohort study</i> —Report numbers of outcome events or summary measures over time<br><i>Case-control study</i> —Report numbers in each exposure category, or summary measures of exposure<br><i>Cross-sectional study</i> —Report numbers of outcome events or summary measures                                                                                                                             |
| Main results,<br>p. 13, 14 | 16  | (a) Give unadjusted estimates and, if applicable, confounder-adjusted estimates and their precision (eg, 95% confidence interval). Make clear which confounders were adjusted for and why they were included<br>(b) Report category boundaries when continuous variables were categorized<br>(c) If relevant, consider translating estimates of relative risk into absolute risk for a meaningful time period |
| Other analyses,<br>p. 18   | 17  | Report other analyses done—eg analyses of subgroups and interactions, and sensitivity analyses                                                                                                                                                                                                                                                                                                                |

**Discussion**

|                             |    |                                                                                                                                                                            |
|-----------------------------|----|----------------------------------------------------------------------------------------------------------------------------------------------------------------------------|
| Key results, p. 15,<br>16   | 18 | Summarise key results with reference to study objectives                                                                                                                   |
| Limitations, p. 18          | 19 | Discuss limitations of the study, taking into account sources of potential bias or imprecision. Discuss both direction and magnitude of any potential bias                 |
| Interpretation,<br>p.17, 18 | 20 | Give a cautious overall interpretation of results considering objectives, limitations, multiplicity of analyses, results from similar studies, and other relevant evidence |
| Generalisability,<br>p 18   | 21 | Discuss the generalisability (external validity) of the study results                                                                                                      |

**Other information**

|               |    |                                                                                                                                                               |
|---------------|----|---------------------------------------------------------------------------------------------------------------------------------------------------------------|
| Funding<br>NA | 22 | Give the source of funding and the role of the funders for the present study and, if applicable, for the original study on which the present article is based |
|---------------|----|---------------------------------------------------------------------------------------------------------------------------------------------------------------|

\*Give information separately for cases and controls in case-control studies and, if applicable, for exposed and unexposed groups in cohort and cross-sectional studies.

**Note:** An Explanation and Elaboration article discusses each checklist item and gives methodological background and published examples of transparent reporting. The STROBE checklist is best used in conjunction with this article (freely available on the Web sites of PLoS Medicine at <http://www.plosmedicine.org/>, Annals of Internal Medicine at <http://www.annals.org/>, and Epidemiology at <http://www.epidem.com/>). Information on the STROBE Initiative is available at [www.strobe-statement.org](http://www.strobe-statement.org).



## An Observational Study of Giant Cell Interstitial Pneumonia and Lung Fibrosis in Hard Metal Lung Disease

|                                 |                                                                                                                                                                                                                                                                                                                                                                                                                                                                                                                                                                                                                                                                                                                                                                                                                                                                                                      |
|---------------------------------|------------------------------------------------------------------------------------------------------------------------------------------------------------------------------------------------------------------------------------------------------------------------------------------------------------------------------------------------------------------------------------------------------------------------------------------------------------------------------------------------------------------------------------------------------------------------------------------------------------------------------------------------------------------------------------------------------------------------------------------------------------------------------------------------------------------------------------------------------------------------------------------------------|
| Journal:                        | <i>BMJ Open</i>                                                                                                                                                                                                                                                                                                                                                                                                                                                                                                                                                                                                                                                                                                                                                                                                                                                                                      |
| Manuscript ID:                  | bmjopen-2013-004407.R2                                                                                                                                                                                                                                                                                                                                                                                                                                                                                                                                                                                                                                                                                                                                                                                                                                                                               |
| Article Type:                   | Research                                                                                                                                                                                                                                                                                                                                                                                                                                                                                                                                                                                                                                                                                                                                                                                                                                                                                             |
| Date Submitted by the Author:   | 08-Mar-2014                                                                                                                                                                                                                                                                                                                                                                                                                                                                                                                                                                                                                                                                                                                                                                                                                                                                                          |
| Complete List of Authors:       | Tanaka, Junichi; Niigata University, Division of Respiratory Medicine<br>Moriyama, Hiroshi; Niigata University, Division of Respiratory Medicine<br>Terada, Masaki; Niigata University, Division of Respiratory Medicine<br>Takada, Toshinori; Niigata University, Division of Respiratory Medicine<br>Suzuki, Eiichi; Niigata University Medical and Dental Hospital, Department of General Medicine<br>Narita, Ichiei; Niigata University, Division of Respiratory Medicine<br>Kawabata, Yoshinori; Tokyo Research Group for Diffuse Parenchymal Lung Diseases,<br>Yamaguchi, Tetsuo; Tokyo Research Group for Diffuse Parenchymal Lung Diseases,<br>Hebisawa, Akira; Tokyo Research Group for Diffuse Parenchymal Lung Diseases,<br>Sakai, Fumikazu; Tokyo Research Group for Diffuse Parenchymal Lung Diseases,<br>Arakawa, Hiroaki; Tokyo Research Group for Diffuse Parenchymal Lung Diseases, |
| <b>Primary Subject Heading</b>: | Occupational and environmental medicine                                                                                                                                                                                                                                                                                                                                                                                                                                                                                                                                                                                                                                                                                                                                                                                                                                                              |
| Secondary Subject Heading:      | Occupational and environmental medicine                                                                                                                                                                                                                                                                                                                                                                                                                                                                                                                                                                                                                                                                                                                                                                                                                                                              |
| Keywords:                       | OCCUPATIONAL & INDUSTRIAL MEDICINE, Thoracic medicine < INTERNAL MEDICINE, Interstitial lung disease < THORACIC MEDICINE                                                                                                                                                                                                                                                                                                                                                                                                                                                                                                                                                                                                                                                                                                                                                                             |
|                                 |                                                                                                                                                                                                                                                                                                                                                                                                                                                                                                                                                                                                                                                                                                                                                                                                                                                                                                      |

SCHOLARONE™  
Manuscripts

1  
2  
3  
4  
5  
6 **An Observational Study of Giant Cell Interstitial Pneumonia and Lung Fibrosis in**  
7  
8 **Hard Metal Lung Disease**  
9

10 <sup>1</sup>Junichi Tanaka, MD, <sup>1</sup>Hiroshi Moriyama, MD, <sup>1</sup>Masaki Terada, MD, <sup>1, 2</sup>Toshinori  
11 Takada, MD, <sup>3</sup>Eiichi Suzuki, MD, <sup>1</sup>Ichiei Narita, MD, <sup>4</sup>Yoshinori Kawabata, MD,  
12  
13 <sup>4</sup>Tetsuo Yamaguchi, MD, <sup>4</sup>Akira Hebisawa, MD, <sup>4</sup>Fumikazu Sakai, MD, and <sup>4</sup>Hiroaki  
14  
15 Arakawa, MD,  
16  
17

18  
19  
20 <sup>1</sup>Division of Respiratory Medicine, Graduate School of Medical and Dental Sciences,  
21  
22 Niigata University, Niigata, Japan, <sup>2</sup>Uonuma Institute of Community Medicine, Niigata  
23  
24 University Medical and Dental Hospital <sup>3</sup>Department of General Medicine, Niigata  
25  
26 University Medical and Dental Hospital, Niigata, Japan, <sup>4</sup>Tokyo Research Group for  
27  
28 Diffuse Parenchymal Lung Diseases, Tokyo, Japan  
29  
30  
31

32  
33  
34  
35 Corresponding author: Toshinori Takada, M.D., PhD

36  
37 Division of Respiratory Medicine, Graduate School of Medical and Dental Sciences,  
38  
39 Niigata University

40  
41 1-757 Asahimachi-dori, Chuo-ku, Niigata, 951-8510, Japan

42  
43  
44 Tel; +81-25-227-2200, Fax; +81-25-227-0775, Email; ttakada@med.niigata-u.ac.jp  
45  
46

47  
48  
49 Keywords: hard metal, pulmonary fibrosis, electron probe microanalysis  
50  
51

52  
53  
54 Word count: 2,921  
55  
56  
57  
58  
59  
60

**ABSTRACT**

**Objectives:** Hard metal lung disease has various pathological patterns including giant cell interstitial pneumonia (GIP) and usual interstitial pneumonia (UIP). Although UIP pattern is considered the prominent feature in advanced disease, it is unknown whether GIP finally progresses to UIP pattern. The aim of our study is to clarify clinical, pathological, and elemental differences between GIP and UIP pattern in hard metal lung disease.

**Setting:** A cross-sectional study for patients of 17 institutes participating in the 10th annual meeting of the Tokyo Research Group for Diffuse Parenchymal Lung Diseases, 2009.

**Participants:** Nineteen patients with 7 females diagnosed as hard metal lung disease by the presence of tungsten in lung specimens.

**Primary and secondary outcome measures:** Clinical, pathological, and elemental differences between GIP and UIP pattern in hard metal lung disease.

**Results:** Fourteen cases were pathologically diagnosed as GIP or centrilobular inflammation/fibrosing. The other five cases were UIP pattern or upper lobe fibrosis. Elemental analyses of lung specimens of GIP showed tungsten throughout the centrilobular fibrotic areas. In UIP pattern, tungsten was detected in periarteriolar area and subpleural fibrosis in no association with centrilobular fibrosis or inflammatory cell infiltration. The GIP group was younger (43.1 vs 58.6 yrs) with shorter exposure duration (73 vs 285 months) ( $p < 0.01$ ), lower serum KL-6 (398 vs 710 U/ml), and higher lymphocyte percentage in bronchoalveolar lavage fluid (31.5 vs 3.22 %) ( $p < 0.05$ ) than

1  
2  
3  
4  
5  
6 the fibrosis group.  
7

8 **Conclusions:** UIP pattern or upper lobe fibrosis is remarkably different from GIP in  
9  
10 distribution of hard metal elements, associated interstitial inflammation and fibrosis,  
11  
12 and clinical features. In hard metal lung disease, UIP pattern or upper lobe fibrosis  
13  
14 may not be an advanced form of GIP.  
15  
16

### 17 18 19 20 **Strengths and limitations of this study** 21

22 1, Nineteen cases of hard metal lung disease, a rare occupational lung disease, were  
23  
24 collected and their clinical features were documented.  
25  
26

27 2, Lung tissue from all the patients was elementally analyzed by a patented technique,  
28  
29 an improved element analysis using electron probe microanalyzers with wavelength  
30  
31 dispersive spectrometer.  
32  
33

34 3, Since the incidences of hard metal lung disease and IPF in potentially exposed  
35  
36 populations and in the general population are unknown, the probability that someone  
37  
38 with hard metal exposure will develop "idiopathic" UIP/IPF is also unknown.  
39  
40  
41  
42  
43  
44  
45  
46  
47  
48  
49  
50  
51  
52  
53  
54  
55  
56  
57  
58  
59  
60

## INTRODUCTION

Hard metal is a synthetic compound that combines tungsten carbide with cobalt. Patients exposed to hard metal may develop occupational asthma, a syndrome resembling hypersensitivity pneumonitis, or interstitial lung disease which is recognized as hard metal lung disease.[1-3] In many cases with hard metal lung disease, multinucleated giant cells with centrilobular fibrosis are prominent resulting in a pattern of giant cell interstitial pneumonia (GIP).[4-6] We demonstrated that hard metal accumulated in the centrilobular area may trigger the inflammation in cooperation with CD163<sup>+</sup> monocyte-macrophages and CD8<sup>+</sup> lymphocytes using electron probe microanalyzers with wavelength dispersive spectrometer (EPMA-WDS).[7] In addition to classical GIP, hard metal lung disease has a variety of pathological patterns, desquamative interstitial pneumonia, obliterative bronchiolitis, and usual interstitial pneumonia (UIP) pattern.[4, 8] The lesions of classical GIP are usually centered on the centrilobular areas. On the other hand, the key histologic features of UIP are predominantly distributed at the periphery of the acinus or lobule.[9, 10] Hard metal lung disease has pathological patterns of both GIP and UIP, and the UIP pattern is thought to be the prominent feature in advanced cases of the disease.[8] The key question is whether UIP pattern is an advanced form of GIP or not. In order to elucidate relationship between GIP and lung fibrosis with detection of hard metal elements, we collected cases with tungsten in lung tissue and reviewed their clinical records. We then elementally reexamined lung specimens by EPMA-WDS. We finally classified the patients into two groups according to the histological findings and



1  
2  
3  
4  
5  
6 statistically compared their clinical features. Pathological and elemental analyses in  
7  
8 the study suggest that UIP pattern or upper lobe fibrosis may be different from an  
9  
10 end-stage form of GIP.  
11

## 12 13 14 15 **METHODS**

### 16 17 **Patient population**

18  
19 We collected patients by announcing inquiry for cases of hard metal lung disease to the  
20  
21 major medical institutes and hospitals all over Japan for the 10th annual meeting of the  
22  
23 Tokyo Research Group for Diffuse Parenchymal Lung Diseases, 2009. We obtained  
24  
25 information of patient profile such as age, gender, duration of hard metal exposure,  
26  
27 history of pneumothorax, history of allergy, symptoms, physical findings, serum levels  
28  
29 of Krebs von den Lungen-6 (KL-6) and SP-D, arterial blood gas data, pulmonary  
30  
31 function tests, bronchoalveolar lavage (BAL) cell profiles and treatment and prognosis  
32  
33 in order to make a data base. We acquired consent from all treating physicians for  
34  
35 each identified case according to the Guidelines for Epidemiological Studies from The  
36  
37 Ministry of Health, Labor and Welfare. The Committee of Ethics, Niigata University,  
38  
39 approved the EPMA-WDS study protocol (#396).  
40  
41  
42  
43  
44  
45  
46  
47  
48

### 49 **HRCT scan findings**

50  
51 All patients with hard metal lung disease except one had undergone high-resolution  
52  
53 computed tomography (HRCT) scanning. Two radiologists (observers) who were  
54  
55 blinded to clinical, laboratory, or pulmonary function test results evaluated CT scan  
56  
57  
58  
59  
60

1  
2  
3  
4  
5  
6 findings. The observers judged each CT scan for the presence or absence of three  
7  
8 main features of centrilobular nodules, ground glass opacity, and pneumothorax. They  
9  
10 also noted other remarkable findings; traction bronchiectasis, reticular pattern,  
11  
12 subpleural linear opacity, consolidation, bulla, centrilobular emphysema, atelectasis, and  
13  
14 bronchial wall thickening and entered these results into a data sheet independently.  
15  
16 After evaluation, disagreement on the results between the observers for some HRCT  
17  
18 scans was resolved by discussion and consensus.  
19  
20  
21  
22  
23  
24

### 25 **Sample preparation and pathological study**

26  
27 Each tissue sample was serially cut into 3  $\mu\text{m}$ -thickness sections and subjected to  
28  
29 pathological study and EPMA-WDS analysis. For pathological study, formalin-fixed 3  
30  
31  $\mu\text{m}$  serial sections were stained with hematoxylin-eosine and Elastica van Gieson  
32  
33 method. Two pathologists (observers), who were blinded to clinical, laboratory, or  
34  
35 pulmonary function test results, evaluated pathological findings. After evaluation,  
36  
37 disagreement on the pathological diagnoses between the observers for some specimens  
38  
39 was resolved by discussion and consensus.  
40  
41  
42  
43  
44  
45  
46

### 47 **Electron probe microanalysis**

48  
49 Examination of tissue sections with EMPA-WDS was performed according to  
50  
51 procedures previously described.[11] X-ray data were obtained with an EPMA-WDS  
52  
53 (EPMA 8705, EPMA-1610, Shimadzu Ltd, Kyoto, Japan). In order to have  
54  
55 representative element maps, we at first microscopically scanned tissue specimens and  
56  
57  
58  
59  
60

1  
2  
3  
4  
5  
6 looked for lesions of centrilobular fibrosis with low magnification because hard metal  
7  
8 related elements, tungsten/cobalt were always found around centrilobular areas  
9  
10 according to our experiences. For EMPA analysis, we at first screened areas of about  
11  
12 1.5 mm x 1.5 mm at largest covering centrilobular lesions or fibrosing lesion of  
13  
14 interstitial lung diseases observed by pathological study to make rough element maps.  
15  
16 Then we focused into areas from 5x5 to 10x10  $\mu\text{m}$  at smallest to draw fine maps for  
17  
18 elements. Each pixel in the focused areas in the tissue was scanned by three  
19  
20 wavelength dispersive crystals; RAP, PET, and LiF for screening elements of Al, K,  
21  
22 RAP; Si, K, PET; Ti, K, LiF; Cr, K, LiF; Fe, K, LiF; Co, K, LiF; Ta, M, PET; W, M,  
23  
24 RAP; Si, K, PET; Ti, K, LiF; Cr, K, LiF; Fe, K, LiF; Co, K, LiF; Ta, M, PET; W, M,  
25  
26 PET, and Zn, L, RAP. Since generated X-ray signals from each pixel were the smallest  
27  
28 part of a distribution map, we simultaneously obtained element maps with qualitative  
29  
30 analyses of pixels in the focused area. The distribution of amino nitrogen  
31  
32 corresponding to the pathological image was also mapped for each sample.  
33  
34  
35  
36  
37  
38  
39

### 40 **Statistical analysis**

41  
42 Comparisons of categorical data were made with chi-square or Fisher's exact test.  
43  
44 Nonparametric numeric data were compared by Mann-Whitney's U-test. A p Value  
45  
46 <0.05 was considered significant.  
47  
48  
49  
50

## 51 **RESULTS**

### 52 **Characteristics of subject**

53  
54  
55  
56 When we held the Tokyo ILD Meeting, 22 cases were collected and suspected to be  
57  
58  
59  
60

1  
2  
3  
4  
5  
6 hard metal lung diseases due to occupational history and pathological findings, but 3  
7  
8 cases were excluded because tungsten or cobalt were not detected in the lung tissue.  
9  
10 Nineteen patients were finally diagnosed as hard metal lung disease because of presence  
11  
12 of tungsten in lung specimens detected by EPMA-WDS. In 4 of 19 patients, the  
13  
14 presence of tungsten, cobalt, or tantalum was not known in the first place and proved by  
15  
16 element analysis at the meeting.  
17  
18  
19

20 Occupational history and clinical features are summarized in Table 1 and 2.  
21  
22 Demographic findings in 6 of these patients have been reported previously (case 2, 5, 7,  
23  
24 8, 10, and 16 corresponding to case 1, 3, 5, 6, 14, and 16 in 2007 report,  
25  
26 respectively).[7] All the subjects had an occupational history of hard metal industry  
27  
28 for 1 to 36 years. One patient (case 15) was doing deskwork in an insufficiently  
29  
30 ventilated room of a hard metal grinding company. Five patients had occupational  
31  
32 history of hard metal industry but were not exposed at the diagnosis of hard metal lung  
33  
34 disease. The delay between cessation of exposure and biopsy in the patients were 5  
35  
36 years, 4 months, 2 months, and 6 months for case 1, 2, 8, and 14, respectively. Case 10  
37  
38 had worked as a metal grinder for 6 years and then as a chimney cleaner at a copper  
39  
40 mine for 32 years. He visited a hospital complaining of dry cough after 32-year work  
41  
42 as a chimney cleaner and was finally diagnosed as hard metal lung diseases 4 years later  
43  
44 by surgical biopsy. Five patients (case 2, 5, 7, 8, and 15) had an allergic history and  
45  
46 were patch tested for Co, Ni, Cr, Hg, Au, Zn, Mn, Ag, Pd, Pt, Sn, Cu, Fe, Al, In, Ir, Ti.  
47  
48 4 of 5 patients who had undergone patch testing (case 2, 5, 7, and 15) were found to be  
49  
50 positive for cobalt. Pulmonary function tests revealed restrictive lung defect  
51  
52  
53  
54  
55  
56  
57  
58  
59  
60

characterized by reduced vital capacity and lung diffusing capacity. BAL findings showed increased total cell counts, increased lymphocytes and eosinophils, with normal CD4/CD8 ratio. Bizarre multinucleated giant cells were noted in 3 patients.

**Table 1. Demographic features of subjects**

| Case | Age | Sex | Smoking history | Occupational history (hard metal exposure) | Exposure (y/m) start/duration | Bx year | Exposure at Dx |
|------|-----|-----|-----------------|--------------------------------------------|-------------------------------|---------|----------------|
| 1    | 39  | M   | non             | Hard metal shaping/drilling                | 2000/12                       | 2006    | No             |
| 2    | 53  | M   | ex              | Hard metal shaping/drilling                | 2002/30                       | 2002    | No             |
| 3    | 21  | M   | non             | Metal grinding                             | 2005/32                       | 2008    | Yes            |
| 4    | 42  | M   | ex              | Hard metal shaping/drilling                | 2005/36                       | 2009    | Yes            |
| 5    | 48  | M   | non             | Metal grinding                             | 2000/48                       | 2004    | NA             |
| 6    | 45  | M   | non             | Hard metal shaping/drilling                | 1982/60                       | 1987    | Yes            |
| 7    | 32  | F   | non             | Metal grinding                             | 1988/60                       | 1993    | Yes            |
| 8    | 32  | F   | non             | Metal grinding                             | 1997/72                       | 2003    | No             |
| 9    | 44  | F   | non             | Hard metal shaping/drilling                | 1990/72                       | 1996    | Yes            |
| 10   | 62  | M   | non             | Metal grinding                             | 1963/72                       | 2003    | No             |
| 11   | 40  | F   | non             | Hard metal shaping/drilling                | 1997/96                       | 2005    | NA             |
| 12   | 48  | M   | non             | Metal grinding                             | 1981/120                      | 1992    | NA             |
| 13   | 49  | F   | non             | Hard metal shaping/drilling                | 1999/120                      | 2009    | Yes            |
| 14   | 65  | F   | non             | Metal grinding                             | 1988/144                      | 2000    | No             |
| 15   | 50  | F   | non             | Desk worker in hard metal factory          | 1985/168                      | 1996    | Yes            |
| 16   | 53  | M   | non             | Quality control of hard metals             | 1974/264                      | 2001    | NA             |
| 17   | 60  | M   | ex              | Hard metal shaping/drilling                | 1972/276                      | 1995    | Yes            |
| 18   | 53  | M   | non             | Hard metal shaping/drilling                | 1971/372                      | 2005    | Yes            |
| 19   | 65  | M   | non             | Hard metal shaping/drilling                | 1963/444                      | 2008    | Yes            |

Abbreviation; Bx, biopsy; Dx, diagnosis; NA, not available.

**Table 2. Clinical characteristics of Patients with Hard metal lung disease**

|                              |                       | Value                             |
|------------------------------|-----------------------|-----------------------------------|
| Mean age at diagnosis (yrs)  |                       | 46.4 ± 14.1 (21 - 65)             |
| Gender                       | M/F                   | 12/7                              |
| Smoking history              | Cur/Ex/Never          | 0/3/16                            |
| Chief complaints             | dry cough             | 13/19                             |
|                              | breath shortness      | 8/19                              |
| Pneumothorax                 | Yes                   | 8/19                              |
| Allergic history             | Yes                   | 5/19                              |
| Patch test to cobalt         | positive              | 4/5                               |
| Mean exposure duration (yrs) |                       | 10.7 ± 10.3 (1 - 36)              |
| Physical findings            | rales on auscultation | 11/19                             |
|                              | fine crackles         | 8/19                              |
|                              | finger clubbing       | 4/18                              |
|                              | edema of leg          | 1/16                              |
| Laboratory tests             | KL-6                  | 502.7 ± 267.5 U/ml                |
|                              | SP-D                  | 216.1 ± 192.4 ng/ml               |
| Pulmonary function tests     |                       |                                   |
|                              | VC, % predicted       | 64.8 ± 25.3 %                     |
|                              | FEV <sub>1</sub>      | 1.71 ± 0.70 L                     |
|                              | FEV <sub>1</sub> /FVC | 85.6 ± 10.7 %                     |
|                              | DLco, % predicted     | 53.4 ± 17.0 %                     |
| Bronchoalveolar lavage       |                       |                                   |
|                              | Total cell count      | 3.13 ± 2.11 × 10 <sup>5</sup> /ml |
|                              | Lymphocytes           | 24.3 ± 22.3 %                     |
|                              | Neutrophils           | 3.07 ± 2.86 %                     |
|                              | Eosinophils           | 3.01 ± 5.03 %                     |
|                              | CD4/8 ratio           | 1.65 ± 2.96                       |

The mean numbers ± standard deviations and ranges in parentheses are shown.

Abbreviation; KL-6, Krebs von den Lungen 6; SP-D, surfactant protein D; VC, vital capacity; FEV<sub>1</sub>,

Forced expiratory volume in 1 second; DLco, Carbon monoxide diffusing capacity

**Radiological findings**

HRCT of all patients except one with hard metal lung disease were available for review of radiological findings. Conventional CT findings of case 12 were added to the table (Table 3). Centrilobular nodules (Fig 1 A, B) and ground glass opacity were identified in chest CT of 16 patients. In some patients, reticular opacities, traction bronchiectasis, and subpleural curvilinear opacities were also present (Fig 1 C, D). Although centrilobular micronodular opacities were noted in those patients, they were not predominant.

**Table 3. Radiologic findings of patients with hard metal lung disease**

| Case | CT features |     |     |                                                                     | radiological diagnosis                         |
|------|-------------|-----|-----|---------------------------------------------------------------------|------------------------------------------------|
|      | CL          | GGO | PTx | other findings                                                      |                                                |
| 1    | +           | -   | -   | bronchial wall thickening                                           | bronchitis (DPB like)                          |
| 2    | +           | +   | -   | reticular opacities                                                 | chronic IP, NOS (NSIP or UIP)                  |
| 3    | +           | +   | +   |                                                                     | subacute HP                                    |
| 4    | +           | -   | +   | subpleural curvilinear opacities                                    | subacute HP                                    |
| 5    | +           | +   | -   |                                                                     | subacute HP                                    |
| 6    | -           | +   | -   | reticular opacities, consolidation                                  | Interstitial pneumonia NOS                     |
| 7    | +           | +   | +   |                                                                     | subacute HP                                    |
| 8    | +           | +   | -   | traction bronchiectasis                                             | subacute HP                                    |
| 9    | +           | +   | -   |                                                                     | subacute HP                                    |
| 10   | +           | +   | -   | reticular opacities<br>traction bronchiectasis                      | UIP                                            |
| 11   | +           | -   | +   |                                                                     | subacute HP                                    |
| 12   | +           | +   | +   | subpleural curvilinear opacities                                    | chronic HP                                     |
| 13   | +           | +   | -   |                                                                     | subacute HP                                    |
| 14   | +           | +   | -   | traction bronchiectasis, apical cap                                 | chronic HP                                     |
| 15   | +           | +   | +   | traction bronchiectasis                                             | subacute HP                                    |
| 16   | -           | +   | +   | subpleural/peribronchovascular<br>consolidation, atelectasis, bulla | upper lobe predominant IP<br>or chronic IP NOS |
| 17   | +           | +   | -   | bulla, centrilobular emphysema                                      | UIP                                            |
| 18   | -           | +   | -   | reticular opacities                                                 | chronic IP, NOS (NSIP or UIP)                  |
| 19   | +           | +   | -   | reticular opacities                                                 | chronic HP                                     |

Abbreviation; CL, centrilobular; GGO, ground-glass opacities; PTx, pneumothorax; DPB, diffuse panbronchiolitis; IP, interstitial pneumonia; NOS, not otherwise specified; NSIP, non-specific interstitial pneumonia; UIP, usual interstitial pneumonia; HP, hypersensitivity pneumonitis

### Pathological findings and elemental analysis

Pathological findings and detected elements in lung tissue of 19 cases were summarized



1  
2  
3  
4  
5  
6 in Table 4. Four major histological features noted in this study were as follows: GIP  
7  
8 characterized with centrilobular fibrosis (Fig 2 A, B) and characteristic giant cells  
9  
10 showing cannibalism (Fig 2 C), centrilobular inflammation/fibrosis similar to GIP but  
11  
12 without giant cells, UIP pattern characterized with patchy distribution and temporal  
13  
14 heterogeneity, and dense fibrosis with fibroblastic foci (Fig 3 A, B, D, E, F) [12], upper  
15  
16 lobe fibrosis characterized with apical scar/cap type fibrosis mainly in the upper  
17  
18 lobe.[13] In the case of upper lobe fibrosis, biopsy specimen contained apical cap-like  
19  
20 subpleural dense fibrosis which was composed of airspace fibrosis (intraluminal  
21  
22 organization) with collapse and increased elastic framework. In autopsy taken 4 years  
23  
24 later, we recognized remarkable subpleural elastosis with a few of cannibalistic giant  
25  
26  
27  
28  
29  
30 cells.

31  
32 Elemental analyses of lung specimens of GIP and centrilobular  
33  
34 inflammation/fibrosis demonstrated that tungsten was mapped almost throughout the  
35  
36 centrilobular fibrotic areas (Fig 2 D, E). Analyses of lung specimens of UIP pattern by  
37  
38 EPMA-WDS revealed that tungsten and tantalum were distributed in periarteriolar area  
39  
40 (Fig 4, D, E) and in subpleural fibrosis with dense acellular collagen (Fig 4 G, H, J, K).  
41  
42 However, these elements were not accompanied by centrilobular inflammation/fibrosis  
43  
44 (Fig 4, A, B). Lung histopathology in one case showed apical cap-like fibrosis with  
45  
46 tungsten deposits detected in the fibrotic region but without GIP.[14] In total,  
47  
48 elemental analysis by EPMA-WDS detected tungsten but no cobalt or tantalum in 10  
49  
50 patients, tungsten and cobalt in 5 patients, and tungsten and tantalum in 4 patients  
51  
52 (Table 4).  
53  
54  
55  
56  
57  
58  
59  
60

**Table 4. Pathological findings and elemental analysis of patients with hard metal lung disease**

| Case | sampling      |                | pathological findings               | elements detected |    |    |
|------|---------------|----------------|-------------------------------------|-------------------|----|----|
|      | method        | site(s)        |                                     | W                 | Co | Ta |
| 1    | VATS          | rt. S5/S8      | centrilobular inflammation/fibrosis | +                 | -  | -  |
| 2    | VATS          | lt. S2/S9      | GIP                                 | +                 | -  | -  |
| 3    | TBB/VATS      | rt. apex       | GIP                                 | +                 | -  | -  |
| 4    | VATS          | rt. S9         | centrilobular inflammation/fibrosis | +                 | -  | -  |
| 5    | VATS          | rt. S4/S9      | GIP                                 | +                 | -  | -  |
| 6    | Autopsy       | NA             | GIP, DAD                            | +                 | -  | -  |
| 7    | VATS          | rt. S8         | centrilobular inflammation/fibrosis | +                 | +  | -  |
| 8    | VATS          | rt. S4/S6      | GIP                                 | +                 | -  | +  |
| 9    | VATS          | rt. S2/S6      | GIP                                 | +                 | +  | -  |
| 10   | VATS          | lt. S1+2/S10   | UIP, GIP                            | +                 | -  | +  |
| 11   | VATS          | lt. S1+2/S9    | GIP                                 | +                 | +  | -  |
| 12   | Autopsy       | NA             | GIP, DAD                            | +                 | -  | -  |
| 13   | VATS          | lt. S1+2/S6    | GIP                                 | +                 | -  | -  |
| 14   | VATS          | lt. S4/S9      | GIP, UIP/NSIP?                      | +                 | -  | +  |
| 15   | VATS          | rt. S6         | GIP                                 | +                 | +  | -  |
| 16   | VATS/autopsy  | lt. S1+2/whole | upper lobe fibrosis                 | +                 | -  | +  |
| 17   | TBB/Lobectomy | -/RLL          | UIP                                 | +                 | -  | -  |
| 18   | VATS          | lt. S1+2/S9    | UIP                                 | +                 | +  | -  |
| 19   | VATS          | rt. S3/S10     | UIP, centrilobular fibrosis         | +                 | -  | +  |

Abbreviation; TBB, trans-bronchial biopsy; VATS, video-assisted thoracic surgery; GIP, giant cell interstitial pneumonia; NA, not available; RLL, right lower lobectomy; DAD, diffuse alveolar damage; UIP, usual interstitial pneumonia; NSIP, non-specific interstitial pneumonia

### Comparison of clinical features

We then classified the patients with hard metal lung disease into two groups according to their pathological findings. We grouped GIP and centrilobular inflammation/fibrosis together, because the latter pattern was considered to be a variant

of GIP due to the similar distribution of lesions. One patient was pathologically diagnosed as upper lobe fibrosis. It has such characteristic findings of subpleural, zonal, rather well defined fibrosis with small cysts and honeycomb lesions similar to that of UIP pattern that we grouped UIP pattern and upper lobe fibrosis together and named them the fibrosis group. We then compared clinical features between the GIP group and the fibrosis group. The GIP group was younger, had shorter exposure duration, lower serum KL-6, and higher lymphocyte percentage in BAL fluid compared with the fibrosis group (Table 5).

**Table 5. Comparison of clinical features between GIP group and fibrosis group**

|                                         | GIP group<br>(n=14) | Fibrosis group<br>(n=5) | p-value |
|-----------------------------------------|---------------------|-------------------------|---------|
| Age (yrs)                               | 43.1 ± 10.8         | 58.6 ± 5.41             | 0.007   |
| Gender (M/F)                            | 7/7                 | 5/0                     | 0.106   |
| Exposure duration (months)              | 73.0 ± 48.8         | 285.6 ± 140.3           | 0.007   |
| Pneumothorax (+/-)                      | 6/8                 | 2/3                     | 1.000   |
| KL-6 (U/ml)                             | 398.7 ± 189.4       | 710.8 ± 297.7           | 0.023   |
| SP-D (ng/ml)                            | 260.3 ± 257.5       | 161.0 ± 54.75           | 0.903   |
| PaO <sub>2</sub> (Torr)                 | 84.3 ± 14.3         | 84.4 ± 11.2             | 0.922   |
| PaCO <sub>2</sub> (Torr)                | 42.8 ± 2.75         | 56.0 ± 34.6             | 0.657   |
| VC, % predicted (%)                     | 64.4 ± 27.1         | 65.5 ± 24.1             | 0.734   |
| FEV <sub>1</sub> (L)                    | 1.63 ± 0.23         | 1.88 ± 0.32             | 0.537   |
| FEV <sub>1</sub> /FVC (%)               | 85.4 ± 12.9         | 86.1 ± 2.62             | 0.910   |
| DLco, % predicted (%)                   | 50.8 ± 16.7         | 57.2 ± 18.8             | 0.371   |
| Bronchoalveolar lavage                  |                     |                         |         |
| Total cell count (×10 <sup>5</sup> /ml) | 3.52 ± 2.41         | 2.26 ± 0.96             | 0.395   |
| Lymphocytes (%)                         | 31.5 ± 23.0         | 8.40 ± 9.08             | 0.015   |
| CD4/8 ratio                             | .76 ± 0.51          | 3.22 ± 4.85             | 0.298   |

Abbreviation; KL-6, Krebs von den Lungen 6; SP-D, surfactant protein D; VC, vital capacity; FEV<sub>1</sub>, Forced expiratory volume in 1 second; DLco, Carbon monoxide diffusing capacity

## DISCUSSION

Pathological features of GIP are interstitial pneumonia with centrilobular fibrosis with multinucleated giant cells in the airspaces.[15] Sometimes centrilobular inflammation/fibrosis is only noted with few giant cells. EPMA-WDS analysis of lung tissue of hard metal lung disease demonstrated that tungsten was distributed in a relatively high concentration almost throughout the centrilobular fibrosis and in giant cells.[7] Comparison of distribution of inflammatory cells and tungsten suggested that inhaled hard metal elements were associated with centrilobular inflammation/fibrosis by CD163<sup>+</sup> macrophages in cooperation with CD8<sup>+</sup> lymphocytes. Thus, centrilobular inflammation/fibrosis without giant cells should also be a variant of hard metal lung disease. GIP was also found in Belgian diamond polishers exposed not to hard metal dust, but to cobalt-containing dust, which confirmed that cobalt plays a dominant role in hard metal lung disease.[16] Cobalt is a well-known skin sensitizer, causing allergic contact dermatitis, and it can also cause occupational asthma.[17] Four patients were positive for patch testing for cobalt. Although such patch testing has been claimed to carry some risk of aggravation of disease in the situation with beryllium, cobalt is included in the routine metal allergy test panel and caused no worsening of hard metal lung disease. Hard metal lung disease cases show features of hypersensitivity pneumonitis (HP) with small interstitial granulomas, although well formed granulomas as in chronic beryllium disease are very rarely seen in the disease or HP. These data

1  
2  
3  
4  
5  
6 suggest that allergic inflammation may be different between hard metal lung disease/HP  
7  
8 and berylliosis.  
9

10  
11 Respiratory symptoms of hard metal lung diseases sometimes improve on holidays  
12 and exacerbate during workdays, which resemble those of HP. Histopathology  
13 findings in HP may also include centrilobular fibrosis in association with isolated giant  
14 cells.[18] However, they do not show cannibalism as those in hard metal lung disease.  
15  
16 BAL is the most sensitive tool to detect HP: a marked lymphocytosis with decreased  
17  
18 CD4/8 ratio is characteristic of BAL findings.[19] BAL findings of patients with hard  
19  
20 metal lung disease show increased total cell counts with increased lymphocytes and  
21  
22 decreased CD4/CD8 ratio.[4, 20-22] Reduced CD4/8 ratio is consistent with the  
23  
24 findings of immunohistochemistry in the previous study.[7] In this study, we found  
25  
26 that lymphocyte percentage in BAL fluid was increased with rather low CD4/8 ratio in  
27  
28 the GIP group, but they were not recognized in fibrosis group.  
29  
30  
31  
32  
33  
34  
35  
36

37  
38 UIP pattern is the pathological abnormality associated with various restrictive lung  
39  
40 diseases, including idiopathic pulmonary fibrosis (IPF). Interstitial inflammation and  
41  
42 fibrosis in UIP pattern does not usually involve centrilobular area and peribronchioles.  
43  
44 Three cases who were pathologically diagnosed as UIP pattern also had centrilobular  
45  
46 micronodular opacities in HRCT findings. One patient was pathologically diagnosed  
47  
48 as UIP pattern and centrilobular fibrosis. Element analysis of the deposition in lung  
49  
50 tissues from patients with IPF/UIP usually demonstrates following elements; Si, Al, Fe,  
51  
52 and Ti with various degrees (unpublished data). While we found tungsten accumulated  
53  
54 in periarteriolar area and subpleural fibrosis in lung specimens of UIP pattern in this  
55  
56  
57  
58  
59  
60

1  
2  
3  
4  
5  
6 study. However, tungsten in periarteriolar area was hardly associated with any fibrosis  
7  
8 or inflammatory cells. These results suggest that individual immune  
9  
10 susceptibility/response to inhaled hard metal elements may decide pathological patterns  
11  
12 of UIP, GIP, or their mixture in varying degrees. Patients develop hard metal lung  
13  
14 disease usually after mean exposure duration of more than 10 years. Although most  
15  
16 studies have found no relation between disease occurrence and length of occupational  
17  
18 exposure, individuals with increased susceptibility may develop hard metal lung disease  
19  
20 after relatively short and low levels of exposure. The GIP group was younger and had  
21  
22 shorter exposure duration suggesting that those who had UIP pattern were individuals  
23  
24 with decreased susceptibility. Upper lobe fibrosis was pathologically diagnosed in one  
25  
26 patient. Although it is significantly different from UIP pattern, tungsten in the fibrosis  
27  
28 was not associated with inflammation around the element, either. With regard to the  
29  
30 relationship between hard metal elements and surrounding inflammation, upper lobe  
31  
32 fibrosis looks similar to UIP pattern in the other cases.  
33  
34  
35  
36  
37  
38

39  
40 Liebow first described GIP as a form of idiopathic interstitial pneumonia.[23] It is  
41  
42 now recognized that GIP is pathognomonic for hard metal lung disease.[24] Since  
43  
44 tungsten and cobalt are only observed within the lungs of subjects who have been  
45  
46 exposed to hard metals, the presence of tungsten and/or cobalt in BAL fluid or lung  
47  
48 specimens leads to a definite diagnosis of hard metal lung disease. According to the  
49  
50 results of elemental analyses in this study, five cases with UIP pattern or upper lobe  
51  
52 fibrosis should be diagnosed as hard metal lung disease. The pathological findings of  
53  
54 UIP pattern demonstrated no physical connection between centrilobular fibrosis and the  
55  
56  
57  
58  
59  
60

1  
2  
3  
4  
5  
6 UIP area, dense fibrosis with fibroblastic foci. Since centrilobular fibrosis is usually  
7  
8 irreversible, if GIP evolved to UIP, sequels of centrilobular fibrosis would be somewhat  
9  
10 linked to peripheral UIP lesion. EPMA-WDS analyses of lung specimens of UIP  
11  
12 pattern revealed that tungsten and tantalum in periarteriolar area were not accompanied  
13  
14 by centrilobular inflammation/fibrosis as seen in typical GIP. In addition, clinical  
15  
16 features of the fibrosis group were different from those of the GIP group. We  
17  
18 identified tungsten in subpleural fibrosis with dense acellular collagen from UIP pattern  
19  
20 and in the fibrotic region from apical cap-like fibrosis. Fibrotic reactions of these  
21  
22 patients could have caused accumulation of hard metal particles as the scars contract  
23  
24 and cut off lymphatic drainage. Those who are not sensitive to hard metal elements,  
25  
26 particularly cobalt, might simply have idiopathic UIP or upper lobe fibrosis by accident  
27  
28 as everyone with interstitial lung disease and a history of asbestos exposure does not  
29  
30 have asbestosis.[25] However, microscopic findings of the lung specimen of UIP  
31  
32 pattern included mild centrilobular inflammation and multinucleated giant cells with  
33  
34 cannibalism, which could never been seen in idiopathic UIP/IPF. If we find tungsten  
35  
36 or cobalt in the biopsies of UIP/fibrosis from the subjects who worked in the hard-metal  
37  
38 industry, we cannot help but make a diagnosis of hard-metal lung disease. Given  
39  
40 present information, we only conclude that the UIP/fibrosis may be induced by hard  
41  
42 metal elements, or just a coincidence. Since the incidences of hard metal lung disease  
43  
44 and IPF in potentially exposed populations and in the general population are unknown,  
45  
46 the probability that someone with hard metal exposure will develop "idiopathic"  
47  
48 UIP/IPF is also unknown.  
49  
50  
51  
52  
53  
54  
55  
56  
57  
58  
59  
60

1  
2  
3  
4  
5  
6 Hard metal lung disease is caused by exposure to cobalt and tungsten carbide.  
7  
8 Toxicity stems from reactive oxygen species generation in a mechanism involving both  
9  
10 elements in mutual contact.[26] Inhaled cobalt and tungsten carbides may cause lung  
11  
12 toxicity even in those who are less sensitive to those elements, which can result in lung  
13  
14 fibrosis with GIP features. Qualitative elemental analysis of fibrosing lesion in GIP  
15  
16 also demonstrated the presence of miscellaneous elements: Al, Si, Ti, Cr, and Fe, in  
17  
18 addition to tungsten, cobalt, and/or Ta.[7] Several sources of evidence suggest that  
19  
20 environmental agents may have an etiologic role in IPF. A meta-analysis of six  
21  
22 case-control studies demonstrated that six exposures including cigarette smoking,  
23  
24 agriculture/farming, livestock, wood dust, metal dust, and stone/sand were significantly  
25  
26 associated with IPF.[27] Metal dust must contain various metal elements. In an  
27  
28 EPMA analysis field of the lung biopsy specimen from upper lobe fibrosis, we found  
29  
30 tungsten scattered throughout the fibrosis as well as aluminum, silicon, and  
31  
32 titanium.[14] Miscellaneous metal dust inhaled in addition to tungsten and cobalt may  
33  
34 cause UIP pattern in less sensitive individuals.  
35  
36  
37  
38  
39  
40  
41  
42  
43  
44

#### 45 **Acknowledgement**

46  
47 The authors thank the following doctors for the supply of cases: Dr. Y. Endo from  
48  
49 Nagaoka Chuo General Hospital, Dr. M. Amano and Dr. S. Aoki from Showa General  
50  
51 Hospital, Dr. T. Ishiguro from Gifu Municipal Hospital, Dr. M. Sakai from Saga Social  
52  
53 Insurance Hospital, Dr. M. Tajiri from Kurume University, Dr T. Ishida from Niigata  
54  
55 Prefectural Central Hospital, Dr. K. Koreeda from Minami Kyusyu National Hospital,  
56  
57  
58  
59  
60



1  
2  
3  
4  
5  
6 Dr. K. Okuno from Kasai City Hospital, Dr. Y. Shimaoka from Nagaoka Red Cross  
7  
8 Hospital, Dr. K. Kashiwada from Nippon Medical School, Dr. T. Sawada and Dr. A.  
9  
10 Shiihara from Kanagawa Cardiovascular and Respiratory Center, Dr. K. Tachibana from  
11  
12 National Hospital Organization Kinki-chuo Chest Medical Center, Dr. T. Azuma from  
13  
14 Shinshu University, Dr. K. Hara and Dr. T. Ishihara from NTT east corporation Kanto  
15  
16 Medical Center, Dr. Y. Waseda from Kanazawa University, Dr. H. Ishii from Oita  
17  
18 University, Dr. H. Matsuoka from Osaka Prefectural Medical Center for Respiratory and  
19  
20 Allergic Diseases, Dr. A Hara from Nagasaki University, Dr. O. Hisata from Tohoku  
21  
22 University, and Dr. H. Tokuda from Social Insurance Chuo General Hospital. The  
23  
24 authors also would like to acknowledge Dr. Kouichi Watanabe and Mr. Masayoshi  
25  
26 Kobayashi of EPMA Laboratory, Center of Instrumental Analysis, Niigata University,  
27  
28 who contributed to elemental analysis of lung specimens.  
29  
30  
31  
32  
33  
34  
35  
36  
37  
38  
39  
40  
41  
42  
43  
44  
45  
46  
47  
48  
49  
50  
51  
52  
53  
54  
55  
56  
57  
58  
59  
60

**Statements**

## a. contributorship,

JT and HM, elemental analysis; ES, IN, and TY, interpretation of the results; MT, ES, YK, AH, pathological study; JT and TT, manuscript preparation; and FS and HA, radiological examination.

## b. funding,

This research received no specific funding.

## c. ethics,

We acquired consent from all treating physicians for each identified case according to the Guidelines for Epidemiological Studies from The Ministry of Health, Labor and Welfare. The Committee of Ethics, Niigata University, approved the EPMA-WDS study protocol (#396).

## d. data sharing,

There are no data shared in the study.

## e. competing interests

None

## References

1. Nemery B. Metal toxicity and the respiratory tract. *Eur Respir J*. 1990;**3**:202-19.
2. Kelleher P, Pacheco K, Newman LS. Inorganic dust pneumonias: the metal-related parenchymal disorders. *Environmental health perspectives*. 2000;**108 Suppl 4**:685-96.
3. Takada T, Moriyama H. Hard Metal Lung Disease. In: Huang Y-CT, Ghio AJ, Maier LA, editors. *A Clinical Guide to Occupational and Environmental Lung Diseases Respiratory Medicine*. New York: Springer; 2012. p. 217-30.
4. Davison AG, Haslam PL, Corrin B et al. Interstitial lung disease and asthma in hard-metal workers: bronchoalveolar lavage, ultrastructural, and analytical findings and results of bronchial provocation tests. *Thorax*. 1983;**38**:119-28.
5. Cugell DW. The hard metal diseases. *Clin Chest Med*. 1992;**13**:269-79.
6. Anttila S, Sutinen S, Paananen M et al. Hard metal lung disease: a clinical, histological, ultrastructural and X-ray microanalytical study. *Eur J Respir Dis*. 1986;**69**:83-94.
7. Moriyama H, Kobayashi M, Takada T et al. Two-dimensional analysis of elements and mononuclear cells in hard metal lung disease. *Am J Respir Crit Care Med*. 2007;**176**:70-7.
8. Ohori NP, Sciruba FC, Owens GR et al. Giant-cell interstitial pneumonia and hard-metal pneumoconiosis. A clinicopathologic study of four cases and review of the literature. *Am J Surg Pathol*. 1989;**13**:581-7.
9. Travis WD, Matsui K, Moss J et al. Idiopathic nonspecific interstitial pneumonia: prognostic significance of cellular and fibrosing patterns: survival comparison with

1  
2  
3  
4  
5  
6 usual interstitial pneumonia and desquamative interstitial pneumonia. *Am J Surg Pathol.*

7  
8 2000;**24**:19-33.

9  
10 10. Katzenstein AL, Myers JL. Idiopathic pulmonary fibrosis: clinical relevance of  
11 pathologic classification. *Am J Respir Crit Care Med.* 1998;**157**:1301-15.

12  
13 11. Moriyama H, Yamamoto T, Takatsuka H et al. Expression of macrophage  
14 colony-stimulating factor and its receptor in hepatic granulomas of  
15 Kupffer-cell-depleted mice. *Am J Pathol.* 1997;**150**:2047-60.

16  
17 12. American Thoracic Society. Idiopathic pulmonary fibrosis: diagnosis and treatment.  
18 International consensus statement. American Thoracic Society (ATS), and the European  
19 Respiratory Society (ERS). *Am J Respir Crit Care Med.* 2000;**161**:646-64.

20  
21 13. Shiota S, Shimizu K, Suzuki M et al. [Seven cases of marked pulmonary fibrosis in  
22 the upper lobe]. *Nihon Kokyuki Gakkai Zasshi.* 1999;**37**:87-96.

23  
24 14. Kaneko Y, Kikuchi N, Ishii Y et al. Upper lobe-dominant pulmonary fibrosis  
25 showing deposits of hard metal component in the fibrotic lesions. *Intern Med.*  
26 2010;**49**:2143-5.

27  
28 15. Naqvi AH, Hunt A, Burnett BR et al. Pathologic spectrum and lung dust burden in  
29 giant cell interstitial pneumonia (hard metal disease/cobalt pneumonitis): review of 100  
30 cases. *Arch Environ Occup Health.* 2008;**63**:51-70.

31  
32 16. Demedts M, Gheysens B, Nagels J et al. Cobalt lung in diamond polishers. *The*  
33  
34  
35  
36  
37  
38  
39  
40  
41  
42  
43  
44  
45  
46  
47  
48  
49  
50  
51  
52  
53  
54  
55  
56  
57  
58  
59  
60  
*American review of respiratory disease.* 1984;**130**:130-5.

17. Nemery B, Verbeken EK, Demedts M. Giant cell interstitial pneumonia (hard metal  
lung disease, cobalt lung). *Semin Respir Crit Care Med.* 2001;**22**:435-48.

- 1  
2  
3  
4  
5  
6 18. Churg A, Muller NL, Flint J et al. Chronic hypersensitivity pneumonitis. *Am J Surg*  
7  
8 *Pathol.* 2006;**30**:201-8.  
9
- 10 19. D'Ippolito R, Chetta A, Foresi A et al. Induced sputum and bronchoalveolar lavage  
11  
12 from patients with hypersensitivity pneumonitis. *Respir Med.* 2004;**98**:977-83.  
13
- 14 20. Okuno K, Kobayashi K, Kotani Y et al. A case of hard metal lung disease  
15  
16 resembling a hypersensitive pneumonia in radiological images. *Intern Med.*  
17  
18 2010;**49**:1185-9.  
19
- 20 21. Kakugawa T, Mukae H, Nagata T et al. Giant cell interstitial pneumonia in a  
21  
22 15-year-old boy. *Intern Med.* 2002;**41**:1007-12.  
23
- 24 22. Forni A. Bronchoalveolar lavage in the diagnosis of hard metal disease. *Sci Total*  
25  
26 *Environ.* 1994;**150**:69-76.  
27
- 28 23. Liebow AA. Definition and classification of interstitial pneumonias in human  
29  
30 pathology. *Prog Respir Res.* 1975:1-33.  
31
- 32 24. Abraham JL, Burnett BR, Hunt A. Development and use of a pneumoconiosis  
33  
34 database of human pulmonary inorganic particulate burden in over 400 lungs. *Scanning*  
35  
36 *Microsc.* 1991;**5**:95-104; discussion 5-8.  
37
- 38 25. Gaensler EA, Jederlinic PJ, Churg A. Idiopathic pulmonary fibrosis in  
39  
40 asbestos-exposed workers. *The American review of respiratory disease.*  
41  
42 1991;**144**:689-96.  
43
- 44 26. Fubini B. Surface reactivity in the pathogenic response to particulates.  
45  
46 *Environmental health perspectives.* 1997;**105 Suppl 5**:1013-20.  
47
- 48 27. Taskar VS, Coultas DB. Is idiopathic pulmonary fibrosis an environmental disease?  
49  
50  
51  
52  
53  
54  
55  
56  
57  
58  
59  
60

1  
2  
3  
4  
5  
6 *Proc Am Thorac Soc.* 2006;3:293-8.  
7  
8  
9  
10  
11  
12  
13  
14  
15  
16  
17  
18  
19  
20  
21  
22  
23  
24  
25  
26  
27  
28  
29  
30  
31  
32  
33  
34  
35  
36  
37  
38  
39  
40  
41  
42  
43  
44  
45  
46  
47  
48  
49  
50  
51  
52  
53  
54  
55  
56  
57  
58  
59  
60

For peer review only

**FIGURE LEGENDS****Figure 1**

High-resolution computed tomography of the chest illustrating differences in the radiographic appearance of the lungs in giant cell interstitial pneumonia (GIP) and in usual interstitial pneumonia (UIP) pattern. (A, B) In GIP of case 9, centrilobular micronodular opacities pathologically correspond to centrilobular fibrosis and giant cell accumulation within the alveolar space. (C, D) In UIP pattern of case 10, reticular opacities and traction bronchiectasis are present with centrilobular micronodular opacities.

**Figure 2**

Representative images of light microscopic findings and electron probe microanalyser with wavelength dispersive spectrometer (EPMA-WDS) of S6 specimen from case 9 pathologically diagnosed as giant cell interstitial pneumonia. (A, B, and C) The black square area in centrilobular fibrosis is stepwise magnified to show multinucleated giant cells with cannibalism. (A, D) The green square area in subpleural zone is elementally analyzed by EPMA-WDS to show (E) many orange spots corresponding to tungsten. A qualitative colored image of tungsten distribution is superimposed onto a lung tissue image of amino nitrogen colored green. Note that tungsten is widely distributed in centrilobular fibrosis as well as surrounding alveolar walls. Original magnification, (A) panoramic view, (B) x 4, (C) x 60, and (D) x 8.

**Figure 3**

Representative images of light microscopic findings of lung specimen from case 10 with hard metal lung disease pathologically diagnosed as usual interstitial pneumonia pattern. (A, B) A low magnification view of left S1+2 specimen demonstrates a combination of patchy interstitial fibrosis with alternating areas of normal lung and architectural alteration due to chronic scarring or honeycomb change. Note that there are several small bronchioles with mild centrilobular inflammation (blue arrows). (B, C) Multinucleated giant cells with cannibalism are also shown in a stepwise-magnified black square area located in subpleural fibrosis. (D, E, F) Left S10 specimen from the same patient also shows characteristic fibroblastic foci (black arrows) in the background of dense acellular collagen in a stepwise-magnified square area located in subpleural fibrosis. Original magnification, (A, D) panoramic view, (B) x 2, (C) x 40, (E) x 4 and (F) x 20.

**Figure 4**

Representative images of light micrographs and electron probe microanalyser with wavelength dispersive spectrometer (EPMA-WDS) of lung specimen from case 10 with hard metal lung disease pathologically diagnosed as usual interstitial pneumonia pattern (A). (B, C) An arteriole and its surrounding interstitium (orange square) are elementally analyzed by EPMA-WDS to demonstrate that (D) tungsten and (E) tantalum are distributed in periarteriolar area with little fibrosis. Elemental analysis by EPMA-WDS of subpleural fibrosis with dense acellular collagen (green square in B, F,



1  
2  
3  
4  
5  
6 I) also shows (G, J) tungsten and (H, K) tantalum almost randomly distributed in  
7  
8 magnified images (yellow squares in G and H are magnified to show (J) tungsten and  
9  
10 (K) tantalum). We did not further analyze the centrilobular pattern or the cannibalistic  
11  
12 giant cells shown in Fig 3. Note that the distribution of tungsten is not completely the  
13  
14 same as that of tantalum. Original magnification, (A) panoramic view and (B) x 4.  
15  
16 Scale bars for the magnification and scan areas for (E), (H), and (K) correspond to  
17  
18 100 $\mu$ m (0.768 x 0.768 mm), 200 $\mu$ m (1.536 x 1.536 mm), and 25 $\mu$ m (0.1792 x 0.1792  
19  
20 mm), respectively.  
21  
22  
23  
24  
25  
26  
27  
28  
29  
30  
31  
32  
33  
34  
35  
36  
37  
38  
39  
40  
41  
42  
43  
44  
45  
46  
47  
48  
49  
50  
51  
52  
53  
54  
55  
56  
57  
58  
59  
60

1  
2  
3  
4  
5  
6 **An Observational Study of Giant Cell Interstitial Pneumonia and Lung Fibrosis in**  
7  
8 **Hard Metal Lung Disease**  
9

10 <sup>1</sup>Junichi Tanaka, MD, <sup>1</sup>Hiroshi Moriyama, MD, <sup>1</sup>Masaki Terada, MD, <sup>1, 2</sup>Toshinori  
11 Takada, MD, <sup>3</sup>Eiichi Suzuki, MD, <sup>1</sup>Ichiei Narita, MD, <sup>4</sup>Yoshinori Kawabata, MD,  
12  
13 <sup>4</sup>Tetsuo Yamaguchi, MD, <sup>4</sup>Akira Hebisawa, MD, <sup>4</sup>Fumikazu Sakai, MD, and <sup>4</sup>Hiroaki  
14  
15 Arakawa, MD,  
16  
17

18  
19  
20 <sup>1</sup>Division of Respiratory Medicine, Graduate School of Medical and Dental Sciences,  
21  
22 Niigata University, Niigata, Japan, <sup>2</sup>Uonuma Institute of Community Medicine, Niigata  
23  
24 University Medical and Dental Hospital <sup>3</sup>Department of General Medicine, Niigata  
25  
26 University Medical and Dental Hospital, Niigata, Japan, <sup>4</sup>Tokyo Research Group for  
27  
28 Diffuse Parenchymal Lung Diseases, Tokyo, Japan  
29  
30  
31

32  
33  
34  
35 Corresponding author: Toshinori Takada, M.D., PhD

36  
37 Division of Respiratory Medicine, Graduate School of Medical and Dental Sciences,  
38  
39 Niigata University

40  
41 1-757 Asahimachi-dori, Chuo-ku, Niigata, 951-8510, Japan

42  
43  
44 Tel; +81-25-227-2200, Fax; +81-25-227-0775, Email; ttakada@med.niigata-u.ac.jp  
45  
46  
47

48  
49 Keywords: hard metal, pulmonary fibrosis, electron probe microanalysis  
50  
51

52  
53  
54 Word count: 2,921  
55  
56  
57  
58  
59  
60

**Statements**

## a. contributorship,

JT and HM, elemental analysis; ES, IN, and TY, interpretation of the results; MT, ES, YK, AH, pathological study; JT and TT, manuscript preparation; and FS and HA, radiological examination.

## b. funding,

This research received no specific funding.

## c. ethics,

We acquired consent from all treating physicians for each identified case according to the Guidelines for Epidemiological Studies from The Ministry of Health, Labor and Welfare. The Committee of Ethics, Niigata University, approved the EPMA-WDS study protocol (#396).

## d. data sharing,

There are no data shared in the study.

**ABSTRACT**

**Objectives:** Hard metal lung disease has various pathological patterns including giant cell interstitial pneumonia (GIP) and usual interstitial pneumonia (UIP). Although UIP pattern is considered the prominent feature in advanced disease, it is unknown whether GIP finally progresses to UIP pattern. The aim of our study is to clarify clinical, pathological, and elemental differences between GIP and UIP pattern in hard metal lung disease.

**Setting:** A cross-sectional study for patients of 17 institutes participating in the 10th annual meeting of the Tokyo Research Group for Diffuse Parenchymal Lung Diseases, 2009.

**Participants:** Nineteen patients with 7 females diagnosed as hard metal lung disease by the presence of tungsten in lung specimens.

**Primary and secondary outcome measures:** Clinical, pathological, and elemental differences between GIP and UIP pattern in hard metal lung disease.

**Results:** Fourteen cases were pathologically diagnosed as GIP or centrilobular inflammation/fibrosing. The other five cases were UIP pattern or upper lobe fibrosis. Elemental analyses of lung specimens of GIP showed tungsten throughout the centrilobular fibrotic areas. In UIP pattern, tungsten was detected in periarteriolar area and subpleural fibrosis in no association with centrilobular fibrosis or inflammatory cell infiltration. The GIP group was younger (43.1 vs 58.6 yrs) with shorter exposure duration (73 vs 285 months) ( $p < 0.01$ ), lower serum KL-6 (398 vs 710 U/ml), and higher lymphocyte percentage in bronchoalveolar lavage fluid (31.5 vs 3.22 %) ( $p < 0.05$ ) than

1  
2  
3  
4  
5  
6 the fibrosis group.  
7

8 **Conclusions:** UIP pattern or upper lobe fibrosis is remarkably different from GIP in  
9  
10 distribution of hard metal elements, associated interstitial inflammation and fibrosis,  
11  
12 and clinical features. In hard metal lung disease, UIP pattern or upper lobe fibrosis  
13  
14 may not be an advanced form of GIP.  
15  
16

### 17 18 19 20 **Strengths and limitations of this study** 21

22 1, Nineteen cases of hard metal lung disease, a rare occupational lung disease, were  
23  
24 collected and their clinical features were documented.  
25

26  
27 2, Lung tissue from all the patients was elementally analyzed by a patented technique,  
28  
29 an improved element analysis using electron probe microanalyzers with wavelength  
30  
31 dispersive spectrometer.  
32  
33

34  
35 3, Since the incidences of hard metal lung disease and IPF in potentially exposed  
36  
37 populations and in the general population are unknown, the probability that someone  
38  
39 with hard metal exposure will develop "idiopathic" UIP/IPF is also unknown.  
40  
41  
42  
43  
44  
45  
46  
47  
48  
49  
50  
51  
52  
53  
54  
55  
56  
57  
58  
59  
60

## INTRODUCTION

Hard metal is a synthetic compound that combines tungsten carbide with cobalt. Patients exposed to hard metal may develop occupational asthma, a syndrome resembling hypersensitivity pneumonitis, or interstitial lung disease which is recognized as hard metal lung disease.[1-3] In many cases with hard metal lung disease, multinucleated giant cells with centrilobular fibrosis are prominent resulting in a pattern of giant cell interstitial pneumonia (GIP).[4-6] We demonstrated that hard metal accumulated in the centrilobular area may trigger the inflammation in cooperation with CD163<sup>+</sup> monocyte-macrophages and CD8<sup>+</sup> lymphocytes using electron probe microanalyzers with wavelength dispersive spectrometer (EPMA-WDS).[7] In addition to classical GIP, hard metal lung disease has a variety of pathological patterns, desquamative interstitial pneumonia, obliterative bronchiolitis, and usual interstitial pneumonia (UIP) pattern.[4, 8] The lesions of classical GIP are usually centered on the centrilobular areas. On the other hand, the key histologic features of UIP are predominantly distributed at the periphery of the acinus or lobule.[9, 10] Hard metal lung disease has pathological patterns of both GIP and UIP, and the UIP pattern is thought to be the prominent feature in advanced cases of the disease.[8] The key question is whether UIP pattern is an advanced form of GIP or not. In order to elucidate relationship between GIP and lung fibrosis with detection of hard metal elements, we collected cases with tungsten in lung tissue and reviewed their clinical records. We then elementally reexamined lung specimens by EPMA-WDS. We finally classified the patients into two groups according to the histological findings and

1  
2  
3  
4  
5  
6 statistically compared their clinical features. Pathological and elemental analyses in  
7  
8 the study suggest that UIP pattern or upper lobe fibrosis may be different from an  
9  
10 end-stage form of GIP.  
11

## 12 13 14 15 **METHODS**

### 16 17 **Patient population**

18  
19 We collected patients by announcing inquiry for cases of hard metal lung disease to the  
20  
21 major medical institutes and hospitals all over Japan for the 10th annual meeting of the  
22  
23 Tokyo Research Group for Diffuse Parenchymal Lung Diseases, 2009. We obtained  
24  
25 information of patient profile such as age, gender, duration of hard metal exposure,  
26  
27 history of pneumothorax, history of allergy, symptoms, physical findings, serum levels  
28  
29 of Krebs von den Lungen-6 (KL-6) and SP-D, arterial blood gas data, pulmonary  
30  
31 function tests, bronchoalveolar lavage (BAL) cell profiles and treatment and prognosis  
32  
33 in order to make a data base. We acquired consent from all treating physicians for  
34  
35 each identified case according to the Guidelines for Epidemiological Studies from The  
36  
37 Ministry of Health, Labor and Welfare. The Committee of Ethics, Niigata University,  
38  
39 approved the EPMA-WDS study protocol (#396).  
40  
41  
42  
43  
44  
45  
46  
47  
48

### 49 **HRCT scan findings**

50  
51 All patients with hard metal lung disease except one had undergone high-resolution  
52  
53 computed tomography (HRCT) scanning. Two radiologists (observers) who were  
54  
55 blinded to clinical, laboratory, or pulmonary function test results evaluated CT scan  
56  
57  
58  
59  
60

1  
2  
3  
4  
5  
6 findings. The observers judged each CT scan for the presence or absence of three  
7  
8 main features of centrilobular nodules, ground glass opacity, and pneumothorax. They  
9  
10 also noted other remarkable findings; traction bronchiectasis, reticular pattern,  
11  
12 subpleural linear opacity, consolidation, bulla, centrilobular emphysema, atelectasis, and  
13  
14 bronchial wall thickening and entered these results into a data sheet independently.  
15  
16 After evaluation, disagreement on the results between the observers for some HRCT  
17  
18 scans was resolved by discussion and consensus.  
19  
20  
21  
22  
23  
24

### 25 **Sample preparation and pathological study**

26  
27 Each tissue sample was serially cut into 3  $\mu\text{m}$ -thickness sections and subjected to  
28  
29 pathological study and EPMA-WDS analysis. For pathological study, formalin-fixed 3  
30  
31  $\mu\text{m}$  serial sections were stained with hematoxylin-eosine and Elastica van Gieson  
32  
33 method. Two pathologists (observers), who were blinded to clinical, laboratory, or  
34  
35 pulmonary function test results, evaluated pathological findings. After evaluation,  
36  
37 disagreement on the pathological diagnoses between the observers for some specimens  
38  
39 was resolved by discussion and consensus.  
40  
41  
42  
43  
44  
45  
46

### 47 **Electron probe microanalysis**

48  
49 Examination of tissue sections with EMPA-WDS was performed according to  
50  
51 procedures previously described.[11] X-ray data were obtained with an EPMA-WDS  
52  
53 (EPMA 8705, EPMA-1610, Shimadzu Ltd, Kyoto, Japan). In order to have  
54  
55 representative element maps, we at first microscopically scanned tissue specimens and  
56  
57  
58  
59  
60



1  
2  
3  
4  
5  
6 looked for lesions of centrilobular fibrosis with low magnification because hard metal  
7  
8 related elements, tungsten/cobalt were always found around centrilobular areas  
9  
10 according to our experiences. For EMPA analysis, we at first screened areas of about  
11  
12 1.5 mm x 1.5 mm at largest covering centrilobular lesions or fibrosing lesion of  
13  
14 interstitial lung diseases observed by pathological study to make rough element maps.  
15  
16 Then we focused into areas from 5x5 to 10x10  $\mu\text{m}$  at smallest to draw fine maps for  
17  
18 elements. Each pixel in the focused areas in the tissue was scanned by three  
19  
20 wavelength dispersive crystals; RAP, PET, and LiF for screening elements of Al, K,  
21  
22 RAP; Si, K, PET; Ti, K, LiF; Cr, K, LiF; Fe, K, LiF; Co, K, LiF; Ta, M, PET; W, M,  
23  
24 RAP; Si, K, PET; Ti, K, LiF; Cr, K, LiF; Fe, K, LiF; Co, K, LiF; Ta, M, PET; W, M,  
25  
26 PET, and Zn, L, RAP. Since generated X-ray signals from each pixel were the smallest  
27  
28 part of a distribution map, we simultaneously obtained element maps with qualitative  
29  
30 analyses of pixels in the focused area. The distribution of amino nitrogen  
31  
32 corresponding to the pathological image was also mapped for each sample.  
33  
34  
35  
36  
37  
38  
39

### 40 **Statistical analysis**

41  
42 Comparisons of categorical data were made with chi-square or Fisher's exact test.  
43  
44 Nonparametric numeric data were compared by Mann-Whitney's U-test. A p Value  
45  
46 <0.05 was considered significant.  
47  
48  
49  
50

## 51 **RESULTS**

### 52 **Characteristics of subject**

53  
54  
55  
56 When we held the Tokyo ILD Meeting, 22 cases were collected and suspected to be  
57  
58  
59  
60

1  
2  
3  
4  
5  
6 hard metal lung diseases due to occupational history and pathological findings, but 3  
7  
8 cases were excluded because tungsten or cobalt were not detected in the lung tissue.  
9  
10 Nineteen patients were finally diagnosed as hard metal lung disease because of presence  
11  
12 of tungsten in lung specimens detected by EPMA-WDS. In 4 of 19 patients, the  
13  
14 presence of tungsten, cobalt, or tantalum was not known in the first place and proved by  
15  
16 element analysis at the meeting.  
17  
18  
19

20 Occupational history and clinical features are summarized in Table 1 and 2.  
21  
22 Demographic findings in 6 of these patients have been reported previously (case 2, 5, 7,  
23  
24 8, 10, and 16 corresponding to case 1, 3, 5, 6, 14, and 16 in 2007 report,  
25  
26 respectively).[7] All the subjects had an occupational history of hard metal industry  
27  
28 for 1 to 36 years. One patient (case 15) was doing deskwork in an insufficiently  
29  
30 ventilated room of a hard metal grinding company. Five patients had occupational  
31  
32 history of hard metal industry but were not exposed at the diagnosis of hard metal lung  
33  
34 disease. The delay between cessation of exposure and biopsy in the patients were 5  
35  
36 years, 4 months, 2 months, and 6 months for case 1, 2, 8, and 14, respectively. Case 10  
37  
38 had worked as a metal grinder for 6 years and then as a chimney cleaner at a copper  
39  
40 mine for 32 years. He visited a hospital complaining of dry cough after 32-year work  
41  
42 as a chimney cleaner and was finally diagnosed as hard metal lung diseases 4 years later  
43  
44 by surgical biopsy. Five patients (case 2, 5, 7, 8, and 15) had an allergic history and  
45  
46 were patch tested for Co, Ni, Cr, Hg, Au, Zn, Mn, Ag, Pd, Pt, Sn, Cu, Fe, Al, In, Ir, Ti.  
47  
48 4 of 5 patients who had undergone patch testing (case 2, 5, 7, and 15) were found to be  
49  
50 positive for cobalt. Pulmonary function tests revealed restrictive lung defect  
51  
52  
53  
54  
55  
56  
57  
58  
59  
60

characterized by reduced vital capacity and lung diffusing capacity. BAL findings showed increased total cell counts, increased lymphocytes and eosinophils, with normal CD4/CD8 ratio. Bizarre multinucleated giant cells were noted in 3 patients.

**Table 1. Demographic features of subjects**

| Case | Age | Sex | Smoking history | Occupational history (hard metal exposure) | Exposure (y/m) start/duration | Bx year | Exposure at Dx |
|------|-----|-----|-----------------|--------------------------------------------|-------------------------------|---------|----------------|
| 1    | 39  | M   | non             | Hard metal shaping/drilling                | 2000/12                       | 2006    | No             |
| 2    | 53  | M   | ex              | Hard metal shaping/drilling                | 2002/30                       | 2002    | No             |
| 3    | 21  | M   | non             | Metal grinding                             | 2005/32                       | 2008    | Yes            |
| 4    | 42  | M   | ex              | Hard metal shaping/drilling                | 2005/36                       | 2009    | Yes            |
| 5    | 48  | M   | non             | Metal grinding                             | 2000/48                       | 2004    | NA             |
| 6    | 45  | M   | non             | Hard metal shaping/drilling                | 1982/60                       | 1987    | Yes            |
| 7    | 32  | F   | non             | Metal grinding                             | 1988/60                       | 1993    | Yes            |
| 8    | 32  | F   | non             | Metal grinding                             | 1997/72                       | 2003    | No             |
| 9    | 44  | F   | non             | Hard metal shaping/drilling                | 1990/72                       | 1996    | Yes            |
| 10   | 62  | M   | non             | Metal grinding                             | 1963/72                       | 2003    | No             |
| 11   | 40  | F   | non             | Hard metal shaping/drilling                | 1997/96                       | 2005    | NA             |
| 12   | 48  | M   | non             | Metal grinding                             | 1981/120                      | 1992    | NA             |
| 13   | 49  | F   | non             | Hard metal shaping/drilling                | 1999/120                      | 2009    | Yes            |
| 14   | 65  | F   | non             | Metal grinding                             | 1988/144                      | 2000    | No             |
| 15   | 50  | F   | non             | Desk worker in hard metal factory          | 1985/168                      | 1996    | Yes            |
| 16   | 53  | M   | non             | Quality control of hard metals             | 1974/264                      | 2001    | NA             |
| 17   | 60  | M   | ex              | Hard metal shaping/drilling                | 1972/276                      | 1995    | Yes            |
| 18   | 53  | M   | non             | Hard metal shaping/drilling                | 1971/372                      | 2005    | Yes            |
| 19   | 65  | M   | non             | Hard metal shaping/drilling                | 1963/444                      | 2008    | Yes            |

Abbreviation; Bx, biopsy; Dx, diagnosis; NA, not available.

**Table 2. Clinical characteristics of Patients with Hard metal lung disease**

|                              |                       | Value                             |
|------------------------------|-----------------------|-----------------------------------|
| Mean age at diagnosis (yrs)  |                       | 46.4 ± 14.1 (21 - 65)             |
| Gender                       | M/F                   | 12/7                              |
| Smoking history              | Cur/Ex/Never          | 0/3/16                            |
| Chief complaints             | dry cough             | 13/19                             |
|                              | breath shortness      | 8/19                              |
| Pneumothorax                 | Yes                   | 8/19                              |
| Allergic history             | Yes                   | 5/19                              |
| Patch test to cobalt         | positive              | 4/5                               |
| Mean exposure duration (yrs) |                       | 10.7 ± 10.3 (1 - 36)              |
| Physical findings            | rales on auscultation | 11/19                             |
|                              | fine crackles         | 8/19                              |
|                              | finger clubbing       | 4/18                              |
|                              | edema of leg          | 1/16                              |
| Laboratory tests             | KL-6                  | 502.7 ± 267.5 U/ml                |
|                              | SP-D                  | 216.1 ± 192.4 ng/ml               |
| Pulmonary function tests     |                       |                                   |
|                              | VC, % predicted       | 64.8 ± 25.3 %                     |
|                              | FEV <sub>1</sub>      | 1.71 ± 0.70 L                     |
|                              | FEV <sub>1</sub> /FVC | 85.6 ± 10.7 %                     |
|                              | DLco, % predicted     | 53.4 ± 17.0 %                     |
| Bronchoalveolar lavage       |                       |                                   |
|                              | Total cell count      | 3.13 ± 2.11 × 10 <sup>5</sup> /ml |
|                              | Lymphocytes           | 24.3 ± 22.3 %                     |
|                              | Neutrophils           | 3.07 ± 2.86 %                     |
|                              | Eosinophils           | 3.01 ± 5.03 %                     |
|                              | CD4/8 ratio           | 1.65 ± 2.96                       |

The mean numbers ± standard deviations and ranges in parentheses are shown.

Abbreviation; KL-6, Krebs von den Lungen 6; SP-D, surfactant protein D; VC, vital capacity; FEV<sub>1</sub>,

Forced expiratory volume in 1 second; DLco, Carbon monoxide diffusing capacity

### **Radiological findings**

HRCT of all patients except one with hard metal lung disease were available for review of radiological findings. Conventional CT findings of case 12 were added to the table (Table 3). Centrilobular nodules (Fig 1 A, B) and ground glass opacity were identified in chest CT of 16 patients. In some patients, reticular opacities, traction bronchiectasis, and subpleural curvilinear opacities were also present (Fig 1 C, D). Although centrilobular micronodular opacities were noted in those patients, they were not predominant.

**Table 3. Radiologic findings of patients with hard metal lung disease**

| Case | CT features |     |     |                                                                     | radiological diagnosis                         |
|------|-------------|-----|-----|---------------------------------------------------------------------|------------------------------------------------|
|      | CL          | GGO | PTx | other findings                                                      |                                                |
| 1    | +           | -   | -   | bronchial wall thickening                                           | bronchitis (DPB like)                          |
| 2    | +           | +   | -   | reticular opacities                                                 | chronic IP, NOS (NSIP or UIP)                  |
| 3    | +           | +   | +   |                                                                     | subacute HP                                    |
| 4    | +           | -   | +   | subpleural curvilinear opacities                                    | subacute HP                                    |
| 5    | +           | +   | -   |                                                                     | subacute HP                                    |
| 6    | -           | +   | -   | reticular opacities, consolidation                                  | Interstitial pneumonia NOS                     |
| 7    | +           | +   | +   |                                                                     | subacute HP                                    |
| 8    | +           | +   | -   | traction bronchiectasis                                             | subacute HP                                    |
| 9    | +           | +   | -   |                                                                     | subacute HP                                    |
| 10   | +           | +   | -   | reticular opacities<br>traction bronchiectasis                      | UIP                                            |
| 11   | +           | -   | +   |                                                                     | subacute HP                                    |
| 12   | +           | +   | +   | subpleural curvilinear opacities                                    | chronic HP                                     |
| 13   | +           | +   | -   |                                                                     | subacute HP                                    |
| 14   | +           | +   | -   | traction bronchiectasis, apical cap                                 | chronic HP                                     |
| 15   | +           | +   | +   | traction bronchiectasis                                             | subacute HP                                    |
| 16   | -           | +   | +   | subpleural/peribronchovascular<br>consolidation, atelectasis, bulla | upper lobe predominant IP<br>or chronic IP NOS |
| 17   | +           | +   | -   | bulla, centrilobular emphysema                                      | UIP                                            |
| 18   | -           | +   | -   | reticular opacities                                                 | chronic IP, NOS (NSIP or UIP)                  |
| 19   | +           | +   | -   | reticular opacities                                                 | chronic HP                                     |

Abbreviation; CL, centrilobular; GGO, ground-glass opacities; PTx, pneumothorax; DPB, diffuse panbronchiolitis; IP, interstitial pneumonia; NOS, not otherwise specified; NSIP, non-specific interstitial pneumonia; UIP, usual interstitial pneumonia; HP, hypersensitivity pneumonitis

### Pathological findings and elemental analysis

Pathological findings and detected elements in lung tissue of 19 cases were summarized

1  
2  
3  
4  
5  
6 in Table 4. Four major histological features noted in this study were as follows: GIP  
7  
8 characterized with centrilobular fibrosis (Fig 2 A, B) and characteristic giant cells  
9  
10 showing cannibalism (Fig 2 C), centrilobular inflammation/fibrosis similar to GIP but  
11  
12 without giant cells, UIP pattern characterized with patchy distribution and temporal  
13  
14 heterogeneity, and dense fibrosis with fibroblastic foci (Fig 3 A, B, D, E, F) [12], upper  
15  
16 lobe fibrosis characterized with apical scar/cap type fibrosis mainly in the upper  
17  
18 lobe.[13] In the case of upper lobe fibrosis, biopsy specimen contained apical cap-like  
19  
20 subpleural dense fibrosis which was composed of airspace fibrosis (intraluminal  
21  
22 organization) with collapse and increased elastic framework. In autopsy taken 4 years  
23  
24 later, we recognized remarkable subpleural elastosis with a few of cannibalistic giant  
25  
26  
27  
28  
29  
30 cells.

31  
32 Elemental analyses of lung specimens of GIP and centrilobular  
33  
34 inflammation/fibrosis demonstrated that tungsten was mapped almost throughout the  
35  
36 centrilobular fibrotic areas (Fig 2 D, E). Analyses of lung specimens of UIP pattern by  
37  
38 EPMA-WDS revealed that tungsten and tantalum were distributed in periarteriolar area  
39  
40 (Fig 4, D, E) and in subpleural fibrosis with dense acellular collagen (Fig 4 G, H, J, K).  
41  
42 However, these elements were not accompanied by centrilobular inflammation/fibrosis  
43  
44 (Fig 4, A, B). Lung histopathology in one case showed apical cap-like fibrosis with  
45  
46 tungsten deposits detected in the fibrotic region but without GIP.[14] In total,  
47  
48 elemental analysis by EPMA-WDS detected tungsten but no cobalt or tantalum in 10  
49  
50 patients, tungsten and cobalt in 5 patients, and tungsten and tantalum in 4 patients  
51  
52 (Table 4).  
53  
54  
55  
56  
57  
58  
59  
60

**Table 4. Pathological findings and elemental analysis of patients with hard metal lung disease**

| Case | sampling      |                | pathological findings               | elements detected |    |    |
|------|---------------|----------------|-------------------------------------|-------------------|----|----|
|      | method        | site(s)        |                                     | W                 | Co | Ta |
| 1    | VATS          | rt. S5/S8      | centrilobular inflammation/fibrosis | +                 | -  | -  |
| 2    | VATS          | lt. S2/S9      | GIP                                 | +                 | -  | -  |
| 3    | TBB/VATS      | rt. apex       | GIP                                 | +                 | -  | -  |
| 4    | VATS          | rt. S9         | centrilobular inflammation/fibrosis | +                 | -  | -  |
| 5    | VATS          | rt. S4/S9      | GIP                                 | +                 | -  | -  |
| 6    | Autopsy       | NA             | GIP, DAD                            | +                 | -  | -  |
| 7    | VATS          | rt. S8         | centrilobular inflammation/fibrosis | +                 | +  | -  |
| 8    | VATS          | rt. S4/S6      | GIP                                 | +                 | -  | +  |
| 9    | VATS          | rt. S2/S6      | GIP                                 | +                 | +  | -  |
| 10   | VATS          | lt. S1+2/S10   | UIP, GIP                            | +                 | -  | +  |
| 11   | VATS          | lt. S1+2/S9    | GIP                                 | +                 | +  | -  |
| 12   | Autopsy       | NA             | GIP, DAD                            | +                 | -  | -  |
| 13   | VATS          | lt. S1+2/S6    | GIP                                 | +                 | -  | -  |
| 14   | VATS          | lt. S4/S9      | GIP, UIP/NSIP?                      | +                 | -  | +  |
| 15   | VATS          | rt. S6         | GIP                                 | +                 | +  | -  |
| 16   | VATS/autopsy  | lt. S1+2/whole | upper lobe fibrosis                 | +                 | -  | +  |
| 17   | TBB/Lobectomy | -/RLL          | UIP                                 | +                 | -  | -  |
| 18   | VATS          | lt. S1+2/S9    | UIP                                 | +                 | +  | -  |
| 19   | VATS          | rt. S3/S10     | UIP, centrilobular fibrosis         | +                 | -  | +  |

Abbreviation; TBB, trans-bronchial biopsy; VATS, video-assisted thoracic surgery; GIP, giant cell interstitial pneumonia; NA, not available; RLL, right lower lobectomy; DAD, diffuse alveolar damage; UIP, usual interstitial pneumonia; NSIP, non-specific interstitial pneumonia

### Comparison of clinical features

We then classified the patients with hard metal lung disease into two groups according to their pathological findings. We grouped GIP and centrilobular inflammation/fibrosis together, because the latter pattern was considered to be a variant



of GIP due to the similar distribution of lesions. One patient was pathologically diagnosed as upper lobe fibrosis. It has such characteristic findings of subpleural, zonal, rather well defined fibrosis with small cysts and honeycomb lesions similar to that of UIP pattern that we grouped UIP pattern and upper lobe fibrosis together and named them the fibrosis group. We then compared clinical features between the GIP group and the fibrosis group. The GIP group was younger, had shorter exposure duration, lower serum KL-6, and higher lymphocyte percentage in BAL fluid compared with the fibrosis group (Table 5).

**Table 5. Comparison of clinical features between GIP group and fibrosis group**

|                                         | GIP group<br>(n=14) | Fibrosis group<br>(n=5) | p-value |
|-----------------------------------------|---------------------|-------------------------|---------|
| Age (yrs)                               | 43.1 ± 10.8         | 58.6 ± 5.41             | 0.007   |
| Gender (M/F)                            | 7/7                 | 5/0                     | 0.106   |
| Exposure duration (months)              | 73.0 ± 48.8         | 285.6 ± 140.3           | 0.007   |
| Pneumothorax (+/-)                      | 6/8                 | 2/3                     | 1.000   |
| KL-6 (U/ml)                             | 398.7 ± 189.4       | 710.8 ± 297.7           | 0.023   |
| SP-D (ng/ml)                            | 260.3 ± 257.5       | 161.0 ± 54.75           | 0.903   |
| PaO <sub>2</sub> (Torr)                 | 84.3 ± 14.3         | 84.4 ± 11.2             | 0.922   |
| PaCO <sub>2</sub> (Torr)                | 42.8 ± 2.75         | 56.0 ± 34.6             | 0.657   |
| VC, % predicted (%)                     | 64.4 ± 27.1         | 65.5 ± 24.1             | 0.734   |
| FEV <sub>1</sub> (L)                    | 1.63 ± 0.23         | 1.88 ± 0.32             | 0.537   |
| FEV <sub>1</sub> /FVC (%)               | 85.4 ± 12.9         | 86.1 ± 2.62             | 0.910   |
| DLco, % predicted (%)                   | 50.8 ± 16.7         | 57.2 ± 18.8             | 0.371   |
| Bronchoalveolar lavage                  |                     |                         |         |
| Total cell count (×10 <sup>5</sup> /ml) | 3.52 ± 2.41         | 2.26 ± 0.96             | 0.395   |
| Lymphocytes (%)                         | 31.5 ± 23.0         | 8.40 ± 9.08             | 0.015   |
| CD4/8 ratio                             | .76 ± 0.51          | 3.22 ± 4.85             | 0.298   |

Abbreviation; KL-6, Krebs von den Lungen 6; SP-D, surfactant protein D; VC, vital capacity; FEV<sub>1</sub>, Forced expiratory volume in 1 second; DLco, Carbon monoxide diffusing capacity

## DISCUSSION

Pathological features of GIP are interstitial pneumonia with centrilobular fibrosis with multinucleated giant cells in the airspaces.[15] Sometimes centrilobular inflammation/fibrosis is only noted with few giant cells. EPMA-WDS analysis of lung tissue of hard metal lung disease demonstrated that tungsten was distributed in a relatively high concentration almost throughout the centrilobular fibrosis and in giant cells.[7] Comparison of distribution of inflammatory cells and tungsten suggested that inhaled hard metal elements were associated with centrilobular inflammation/fibrosis by CD163<sup>+</sup> macrophages in cooperation with CD8<sup>+</sup> lymphocytes. Thus, centrilobular inflammation/fibrosis without giant cells should also be a variant of hard metal lung disease. GIP was also found in Belgian diamond polishers exposed not to hard metal dust, but to cobalt-containing dust, which confirmed that cobalt plays a dominant role in hard metal lung disease.[16] Cobalt is a well-known skin sensitizer, causing allergic contact dermatitis, and it can also cause occupational asthma.[17] Four patients were positive for patch testing for cobalt. Although such patch testing has been claimed to carry some risk of aggravation of disease in the situation with beryllium, cobalt is included in the routine metal allergy test panel and caused no worsening of hard metal lung disease. Hard metal lung disease cases show features of hypersensitivity pneumonitis (HP) with small interstitial granulomas, although well formed granulomas as in chronic beryllium disease are very rarely seen in the disease or HP. These data

1  
2  
3  
4  
5  
6 suggest that allergic inflammation may be different between hard metal lung disease/HP  
7  
8 and berylliosis.  
9

10  
11 Respiratory symptoms of hard metal lung diseases sometimes improve on holidays  
12 and exacerbate during workdays, which resemble those of HP. Histopathology  
13 findings in HP may also include centrilobular fibrosis in association with isolated giant  
14 cells.[18] However, they do not show cannibalism as those in hard metal lung disease.  
15  
16 BAL is the most sensitive tool to detect HP: a marked lymphocytosis with decreased  
17  
18 CD4/8 ratio is characteristic of BAL findings.[19] BAL findings of patients with hard  
19  
20 metal lung disease show increased total cell counts with increased lymphocytes and  
21  
22 decreased CD4/CD8 ratio.[4, 20-22] Reduced CD4/8 ratio is consistent with the  
23  
24 findings of immunohistochemistry in the previous study.[7] In this study, we found  
25  
26 that lymphocyte percentage in BAL fluid was increased with rather low CD4/8 ratio in  
27  
28 the GIP group, but they were not recognized in fibrosis group.  
29  
30  
31  
32  
33  
34  
35  
36

37  
38 UIP pattern is the pathological abnormality associated with various restrictive lung  
39 diseases, including idiopathic pulmonary fibrosis (IPF). Interstitial inflammation and  
40  
41 fibrosis in UIP pattern does not usually involve centrilobular area and peribronchioles.  
42  
43 Three cases who were pathologically diagnosed as UIP pattern also had centrilobular  
44  
45 micronodular opacities in HRCT findings. One patient was pathologically diagnosed  
46  
47 as UIP pattern and centrilobular fibrosis. Element analysis of the deposition in lung  
48  
49 tissues from patients with IPF/UIP usually demonstrates following elements; Si, Al, Fe,  
50  
51 and Ti with various degrees (unpublished data). While we found tungsten accumulated  
52  
53 in periarteriolar area and subpleural fibrosis in lung specimens of UIP pattern in this  
54  
55  
56  
57  
58  
59  
60

1  
2  
3  
4  
5  
6 study. However, tungsten in periarterolar area was hardly associated with any fibrosis  
7  
8 or inflammatory cells. These results suggest that individual immune  
9  
10 susceptibility/response to inhaled hard metal elements may decide pathological patterns  
11  
12 of UIP, GIP, or their mixture in varying degrees. Patients develop hard metal lung  
13  
14 disease usually after mean exposure duration of more than 10 years. Although most  
15  
16 studies have found no relation between disease occurrence and length of occupational  
17  
18 exposure, individuals with increased susceptibility may develop hard metal lung disease  
19  
20 after relatively short and low levels of exposure. The GIP group was younger and had  
21  
22 shorter exposure duration suggesting that those who had UIP pattern were individuals  
23  
24 with decreased susceptibility. Upper lobe fibrosis was pathologically diagnosed in one  
25  
26 patient. Although it is significantly different from UIP pattern, tungsten in the fibrosis  
27  
28 was not associated with inflammation around the element, either. With regard to the  
29  
30 relationship between hard metal elements and surrounding inflammation, upper lobe  
31  
32 fibrosis looks similar to UIP pattern in the other cases.  
33  
34  
35  
36  
37  
38

39  
40 Liebow first described GIP as a form of idiopathic interstitial pneumonia.[23] It is  
41  
42 now recognized that GIP is pathognomonic for hard metal lung disease.[24] Since  
43  
44 tungsten and cobalt are only observed within the lungs of subjects who have been  
45  
46 exposed to hard metals, the presence of tungsten and/or cobalt in BAL fluid or lung  
47  
48 specimens leads to a definite diagnosis of hard metal lung disease. According to the  
49  
50 results of elemental analyses in this study, five cases with UIP pattern or upper lobe  
51  
52 fibrosis should be diagnosed as hard metal lung disease. The pathological findings of  
53  
54 UIP pattern demonstrated no physical connection between centrilobular fibrosis and the  
55  
56  
57  
58  
59  
60

1  
2  
3  
4  
5  
6 UIP area, dense fibrosis with fibroblastic foci. Since centrilobular fibrosis is usually  
7  
8 irreversible, if GIP evolved to UIP, sequels of centrilobular fibrosis would be somewhat  
9  
10 linked to peripheral UIP lesion. EPMA-WDS analyses of lung specimens of UIP  
11  
12 pattern revealed that tungsten and tantalum in periarteriolar area were not accompanied  
13  
14 by centrilobular inflammation/fibrosis as seen in typical GIP. In addition, clinical  
15  
16 features of the fibrosis group were different from those of the GIP group. We  
17  
18 identified tungsten in subpleural fibrosis with dense acellular collagen from UIP pattern  
19  
20 and in the fibrotic region from apical cap-like fibrosis. Fibrotic reactions of these  
21  
22 patients could have caused accumulation of hard metal particles as the scars contract  
23  
24 and cut off lymphatic drainage. Those who are not sensitive to hard metal elements,  
25  
26 particularly cobalt, might simply have idiopathic UIP or upper lobe fibrosis by accident  
27  
28 as everyone with interstitial lung disease and a history of asbestos exposure does not  
29  
30 have asbestosis.[25] However, microscopic findings of the lung specimen of UIP  
31  
32 pattern included mild centrilobular inflammation and multinucleated giant cells with  
33  
34 cannibalism, which could never been seen in idiopathic UIP/IPF. If we find tungsten  
35  
36 or cobalt in the biopsies of UIP/fibrosis from the subjects who worked in the hard-metal  
37  
38 industry, we cannot help but make a diagnosis of hard-metal lung disease. Given  
39  
40 present information, we only conclude that the UIP/fibrosis may be induced by hard  
41  
42 metal elements, or just a coincidence. **Since the incidences of hard metal lung disease**  
43  
44 **and IPF in potentially exposed populations and in the general population are unknown,**  
45  
46 **the probability that someone with hard metal exposure will develop "idiopathic"**  
47  
48 **UIP/IPF is also unknown.**

1  
2  
3  
4  
5  
6 Hard metal lung disease is caused by exposure to cobalt and tungsten carbide.  
7  
8 Toxicity stems from reactive oxygen species generation in a mechanism involving both  
9  
10 elements in mutual contact.[26] Inhaled cobalt and tungsten carbides may cause lung  
11  
12 toxicity even in those who are less sensitive to those elements, which can result in lung  
13  
14 fibrosis with GIP features. Qualitative elemental analysis of fibrosing lesion in GIP  
15  
16 also demonstrated the presence of miscellaneous elements: Al, Si, Ti, Cr, and Fe, in  
17  
18 addition to tungsten, cobalt, and/or Ta.[7] Several sources of evidence suggest that  
19  
20 environmental agents may have an etiologic role in IPF. A meta-analysis of six  
21  
22 case-control studies demonstrated that six exposures including cigarette smoking,  
23  
24 agriculture/farming, livestock, wood dust, metal dust, and stone/sand were significantly  
25  
26 associated with IPF.[27] Metal dust must contain various metal elements. In an  
27  
28 EPMA analysis field of the lung biopsy specimen from upper lobe fibrosis, we found  
29  
30 tungsten scattered throughout the fibrosis as well as aluminum, silicon, and  
31  
32 titanium.[14] Miscellaneous metal dust inhaled in addition to tungsten and cobalt may  
33  
34 cause UIP pattern in less sensitive individuals.  
35  
36  
37  
38  
39  
40  
41  
42  
43  
44

### 45 **Acknowledgement**

46  
47 The authors thank the following doctors for the supply of cases: Dr. Y. Endo from  
48  
49 Nagaoka Chuo General Hospital, Dr. M. Amano and Dr. S. Aoki from Showa General  
50  
51 Hospital, Dr. T. Ishiguro from Gifu Municipal Hospital, Dr. M. Sakai from Saga Social  
52  
53 Insurance Hospital, Dr. M. Tajiri from Kurume University, Dr T. Ishida from Niigata  
54  
55 Prefectural Central Hospital, Dr. K. Koreeda from Minami Kyusyu National Hospital,  
56  
57  
58  
59  
60

1  
2  
3  
4  
5  
6 Dr. K. Okuno from Kasai City Hospital, Dr. Y. Shimaoka from Nagaoka Red Cross  
7  
8 Hospital, Dr. K. Kashiwada from Nippon Medical School, Dr. T. Sawada and Dr. A.  
9  
10 Shiihara from Kanagawa Cardiovascular and Respiratory Center, Dr. K. Tachibana from  
11  
12 National Hospital Organization Kinki-chuo Chest Medical Center, Dr. T. Azuma from  
13  
14 Shinshu University, Dr. K. Hara and Dr. T. Ishihara from NTT east corporation Kanto  
15  
16 Medical Center, Dr. Y. Waseda from Kanazawa University, Dr. H. Ishii from Oita  
17  
18 University, Dr. H. Matsuoka from Osaka Prefectural Medical Center for Respiratory and  
19  
20 Allergic Diseases, Dr. A Hara from Nagasaki University, Dr. O. Hisata from Tohoku  
21  
22 University, and Dr. H. Tokuda from Social Insurance Chuo General Hospital. The  
23  
24 authors also would like to acknowledge Dr. Kouichi Watanabe and Mr. Masayoshi  
25  
26 Kobayashi of EPMA Laboratory, Center of Instrumental Analysis, Niigata University,  
27  
28 who contributed to elemental analysis of lung specimens.  
29  
30  
31  
32  
33  
34  
35  
36  
37  
38  
39  
40  
41  
42  
43  
44  
45  
46  
47  
48  
49  
50  
51  
52  
53  
54  
55  
56  
57  
58  
59  
60

## References

1. Nemery B. Metal toxicity and the respiratory tract. *Eur Respir J*. 1990;**3**:202-19.
2. Kelleher P, Pacheco K, Newman LS. Inorganic dust pneumonias: the metal-related parenchymal disorders. *Environmental health perspectives*. 2000;**108 Suppl 4**:685-96.
3. Takada T, Moriyama H. Hard Metal Lung Disease. In: Huang Y-CT, Ghio AJ, Maier LA, editors. *A Clinical Guide to Occupational and Environmental Lung Diseases Respiratory Medicine*. New York: Springer; 2012. p. 217-30.
4. Davison AG, Haslam PL, Corrin B et al. Interstitial lung disease and asthma in hard-metal workers: bronchoalveolar lavage, ultrastructural, and analytical findings and results of bronchial provocation tests. *Thorax*. 1983;**38**:119-28.
5. Cugell DW. The hard metal diseases. *Clin Chest Med*. 1992;**13**:269-79.
6. Anttila S, Sutinen S, Paananen M et al. Hard metal lung disease: a clinical, histological, ultrastructural and X-ray microanalytical study. *Eur J Respir Dis*. 1986;**69**:83-94.
7. Moriyama H, Kobayashi M, Takada T et al. Two-dimensional analysis of elements and mononuclear cells in hard metal lung disease. *Am J Respir Crit Care Med*. 2007;**176**:70-7.
8. Ohori NP, Sciruba FC, Owens GR et al. Giant-cell interstitial pneumonia and hard-metal pneumoconiosis. A clinicopathologic study of four cases and review of the literature. *Am J Surg Pathol*. 1989;**13**:581-7.
9. Travis WD, Matsui K, Moss J et al. Idiopathic nonspecific interstitial pneumonia: prognostic significance of cellular and fibrosing patterns: survival comparison with



1  
2  
3  
4  
5  
6 usual interstitial pneumonia and desquamative interstitial pneumonia. *Am J Surg Pathol*.

7  
8 2000;**24**:19-33.

9  
10 10. Katzenstein AL, Myers JL. Idiopathic pulmonary fibrosis: clinical relevance of  
11 pathologic classification. *Am J Respir Crit Care Med*. 1998;**157**:1301-15.

12  
13 11. Moriyama H, Yamamoto T, Takatsuka H et al. Expression of macrophage  
14 colony-stimulating factor and its receptor in hepatic granulomas of  
15 Kupffer-cell-depleted mice. *Am J Pathol*. 1997;**150**:2047-60.

16  
17 12. American Thoracic Society. Idiopathic pulmonary fibrosis: diagnosis and treatment.  
18 International consensus statement. American Thoracic Society (ATS), and the European  
19 Respiratory Society (ERS). *Am J Respir Crit Care Med*. 2000;**161**:646-64.

20  
21 13. Shiota S, Shimizu K, Suzuki M et al. [Seven cases of marked pulmonary fibrosis in  
22 the upper lobe]. *Nihon Kokyuki Gakkai Zasshi*. 1999;**37**:87-96.

23  
24 14. Kaneko Y, Kikuchi N, Ishii Y et al. Upper lobe-dominant pulmonary fibrosis  
25 showing deposits of hard metal component in the fibrotic lesions. *Intern Med*.  
26 2010;**49**:2143-5.

27  
28 15. Naqvi AH, Hunt A, Burnett BR et al. Pathologic spectrum and lung dust burden in  
29 giant cell interstitial pneumonia (hard metal disease/cobalt pneumonitis): review of 100  
30 cases. *Arch Environ Occup Health*. 2008;**63**:51-70.

31  
32 16. Demedts M, Gheysens B, Nagels J et al. Cobalt lung in diamond polishers. *The*  
33  
34  
35  
36  
37  
38  
39  
40  
41  
42  
43  
44  
45  
46  
47  
48  
49  
50  
51  
52  
53  
54  
55  
56  
57  
58  
59  
60  
*American review of respiratory disease*. 1984;**130**:130-5.

17. Nemery B, Verbeken EK, Demedts M. Giant cell interstitial pneumonia (hard metal  
lung disease, cobalt lung). *Semin Respir Crit Care Med*. 2001;**22**:435-48.

- 1  
2  
3  
4  
5  
6 18. Churg A, Muller NL, Flint J et al. Chronic hypersensitivity pneumonitis. *Am J Surg*  
7  
8 *Pathol.* 2006;**30**:201-8.  
9
- 10 19. D'Ippolito R, Chetta A, Foresi A et al. Induced sputum and bronchoalveolar lavage  
11  
12 from patients with hypersensitivity pneumonitis. *Respir Med.* 2004;**98**:977-83.  
13
- 14 20. Okuno K, Kobayashi K, Kotani Y et al. A case of hard metal lung disease  
15  
16 resembling a hypersensitive pneumonia in radiological images. *Intern Med.*  
17  
18 2010;**49**:1185-9.  
19
- 20 21. Kakugawa T, Mukae H, Nagata T et al. Giant cell interstitial pneumonia in a  
21  
22 15-year-old boy. *Intern Med.* 2002;**41**:1007-12.  
23
- 24 22. Forni A. Bronchoalveolar lavage in the diagnosis of hard metal disease. *Sci Total*  
25  
26 *Environ.* 1994;**150**:69-76.  
27
- 28 23. Liebow AA. Definition and classification of interstitial pneumonias in human  
29  
30 pathology. *Prog Respir Res.* 1975:1-33.  
31
- 32 24. Abraham JL, Burnett BR, Hunt A. Development and use of a pneumoconiosis  
33  
34 database of human pulmonary inorganic particulate burden in over 400 lungs. *Scanning*  
35  
36 *Microsc.* 1991;**5**:95-104; discussion 5-8.  
37
- 38 25. Gaensler EA, Jederlinic PJ, Churg A. Idiopathic pulmonary fibrosis in  
39  
40 asbestos-exposed workers. *The American review of respiratory disease.*  
41  
42 1991;**144**:689-96.  
43
- 44 26. Fubini B. Surface reactivity in the pathogenic response to particulates.  
45  
46 *Environmental health perspectives.* 1997;**105 Suppl 5**:1013-20.  
47
- 48 27. Taskar VS, Coultas DB. Is idiopathic pulmonary fibrosis an environmental disease?  
49  
50  
51  
52  
53  
54  
55  
56  
57  
58  
59  
60

1  
2  
3  
4  
5  
6  
7  
8  
9  
10  
11  
12  
13  
14  
15  
16  
17  
18  
19  
20  
21  
22  
23  
24  
25  
26  
27  
28  
29  
30  
31  
32  
33  
34  
35  
36  
37  
38  
39  
40  
41  
42  
43  
44  
45  
46  
47  
48  
49  
50  
51  
52  
53  
54  
55  
56  
57  
58  
59  
60

*Proc Am Thorac Soc.* 2006;3:293-8.

For peer review only

## FIGURE LEGENDS

### Figure 1

High-resolution computed tomography of the chest illustrating differences in the radiographic appearance of the lungs in giant cell interstitial pneumonia (GIP) and in usual interstitial pneumonia (UIP) pattern. (A, B) In GIP of case 9, centrilobular micronodular opacities pathologically correspond to centrilobular fibrosis and giant cell accumulation within the alveolar space. (C, D) In UIP pattern of case 10, reticular opacities and traction bronchiectasis are present with centrilobular micronodular opacities.

### Figure 2

Representative images of light microscopic findings and electron probe microanalyser with wavelength dispersive spectrometer (EPMA-WDS) of S6 specimen from case 9 pathologically diagnosed as giant cell interstitial pneumonia. (A, B, and C) The black square area in centrilobular fibrosis is stepwise magnified to show multinucleated giant cells with cannibalism. (A, D) The green square area in subpleural zone is elementally analyzed by EPMA-WDS to show (E) many orange spots corresponding to tungsten. A qualitative colored image of tungsten distribution is superimposed onto a lung tissue image of amino nitrogen colored green. Note that tungsten is widely distributed in centrilobular fibrosis as well as surrounding alveolar walls. Original magnification, (A) panoramic view, (B) x 4, (C) x 60, and (D) x 8.

**Figure 3**

Representative images of light microscopic findings of lung specimen from case 10 with hard metal lung disease pathologically diagnosed as usual interstitial pneumonia pattern. (A, B) A low magnification view of left S1+2 specimen demonstrates a combination of patchy interstitial fibrosis with alternating areas of normal lung and architectural alteration due to chronic scarring or honeycomb change. Note that there are several small bronchioles with mild centrilobular inflammation (blue arrows). (B, C) Multinucleated giant cells with cannibalism are also shown in a stepwise-magnified black square area located in subpleural fibrosis. (D, E, F) Left S10 specimen from the same patient also shows characteristic fibroblastic foci (black arrows) in the background of dense acellular collagen in a stepwise-magnified square area located in subpleural fibrosis. Original magnification, (A, D) panoramic view, (B) x 2, (C) x 40, (E) x 4 and (F) x 20.

**Figure 4**

Representative images of light micrographs and electron probe microanalyser with wavelength dispersive spectrometer (EPMA-WDS) of lung specimen from case 10 with hard metal lung disease pathologically diagnosed as usual interstitial pneumonia pattern (A). (B, C) An arteriole and its surrounding interstitium (orange square) are elementally analyzed by EPMA-WDS to demonstrate that (D) tungsten and (E) tantalum are distributed in periarteriolar area with little fibrosis. Elemental analysis by EPMA-WDS of subpleural fibrosis with dense acellular collagen (green square in B, F,

1  
2  
3  
4  
5  
6 I) also shows (G, J) tungsten and (H, K) tantalum almost randomly distributed in  
7  
8 magnified images (yellow squares in G and H are magnified to show (J) tungsten and  
9  
10 (K) tantalum). We did not further analyze the centrilobular pattern or the cannibalistic  
11  
12 giant cells shown in Fig 3. Note that the distribution of tungsten is not completely the  
13  
14 same as that of tantalum. Original magnification, (A) panoramic view and (B) x 4.  
15  
16 Scale bars for the magnification and scan areas for (E), (H), and (K) correspond to  
17  
18 100 $\mu$ m (0.768 x 0.768 mm), 200 $\mu$ m (1.536 x 1.536 mm), and 25 $\mu$ m (0.1792 x 0.1792  
19  
20 mm), respectively.  
21  
22  
23  
24  
25  
26  
27  
28  
29  
30  
31  
32  
33  
34  
35  
36  
37  
38  
39  
40  
41  
42  
43  
44  
45  
46  
47  
48  
49  
50  
51  
52  
53  
54  
55  
56  
57  
58  
59  
60

1  
2  
3  
4  
5  
6  
7  
8  
9  
10  
11  
12  
13  
14  
15  
16  
17  
18  
19  
20  
21  
22  
23  
24  
25  
26  
27  
28  
29  
30  
31  
32  
33  
34  
35  
36  
37  
38  
39  
40  
41  
42  
43  
44  
45  
46  
47  
48  
49  
50  
51  
52  
53  
54  
55  
56  
57  
58  
59  
60

Fig 1

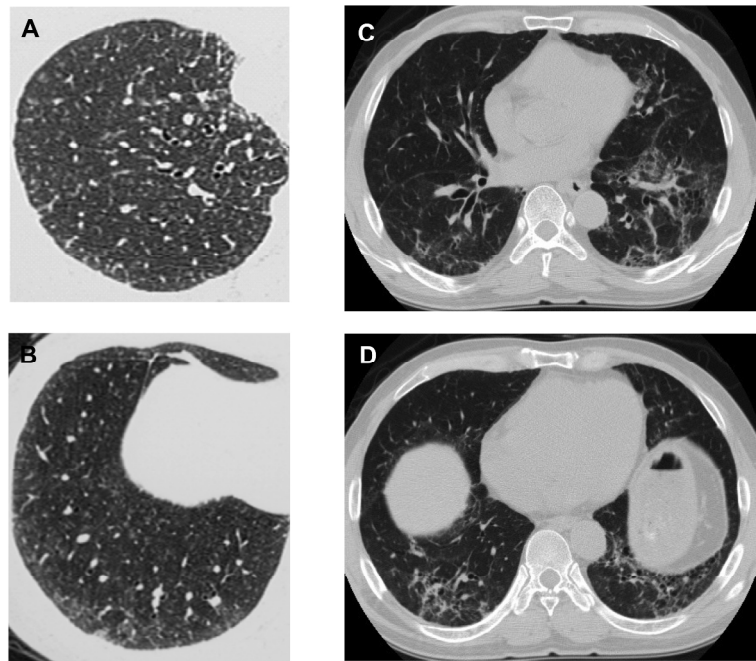

253x190mm (300 x 300 DPI)

ew only

1  
2  
3  
4  
5  
6  
7  
8  
9  
10  
11  
12  
13  
14  
15  
16  
17  
18  
19  
20  
21  
22  
23  
24  
25  
26  
27  
28  
29  
30  
31  
32  
33  
34  
35  
36  
37  
38  
39  
40  
41  
42  
43  
44  
45  
46  
47  
48  
49  
50  
51  
52  
53  
54  
55  
56  
57  
58  
59  
60

Fig 2

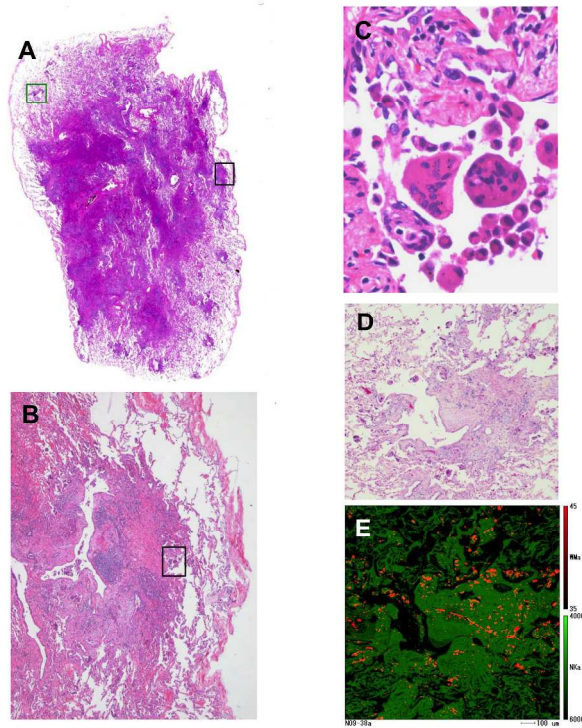

253x190mm (300 x 300 DPI)

ew only



1  
2  
3  
4  
5  
6  
7  
8  
9  
10  
11  
12  
13  
14  
15  
16  
17  
18  
19  
20  
21  
22  
23  
24  
25  
26  
27  
28  
29  
30  
31  
32  
33  
34  
35  
36  
37  
38  
39  
40  
41  
42  
43  
44  
45  
46  
47  
48  
49  
50  
51  
52  
53  
54  
55  
56  
57  
58  
59  
60

Fig 3

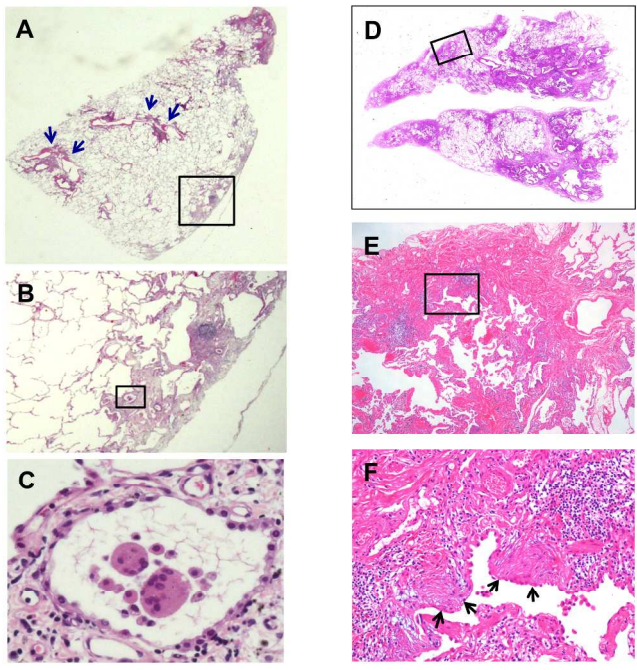

253x190mm (300 x 300 DPI)

ew only

Fig 4

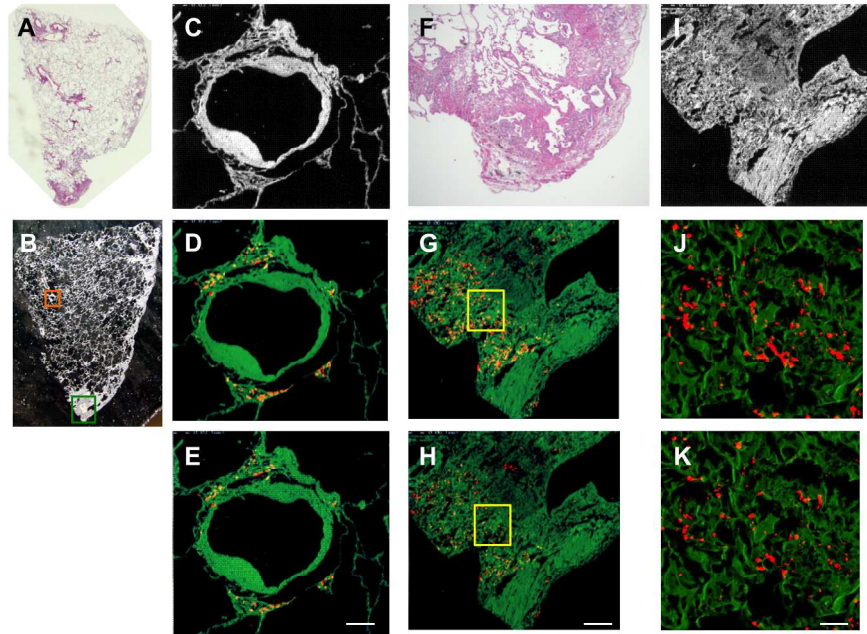

253x190mm (300 x 300 DPI)

## STROBE Statement—checklist of items that should be included in reports of observational studies

|                                        | Item No | Recommendation                                                                                                                                                                                                                                                                                                                                                                                                                                                                                                                                                                                                                                                                                   |
|----------------------------------------|---------|--------------------------------------------------------------------------------------------------------------------------------------------------------------------------------------------------------------------------------------------------------------------------------------------------------------------------------------------------------------------------------------------------------------------------------------------------------------------------------------------------------------------------------------------------------------------------------------------------------------------------------------------------------------------------------------------------|
| <b>Title and abstract</b><br>p. 1, 3-4 | 1       | (a) Indicate the study's design with a commonly used term in the title or the abstract<br>(b) Provide in the abstract an informative and balanced summary of what was done and what was found                                                                                                                                                                                                                                                                                                                                                                                                                                                                                                    |
| <b>Introduction</b>                    |         |                                                                                                                                                                                                                                                                                                                                                                                                                                                                                                                                                                                                                                                                                                  |
| Background/rationale<br>p. 5           | 2       | Explain the scientific background and rationale for the investigation being reported                                                                                                                                                                                                                                                                                                                                                                                                                                                                                                                                                                                                             |
| Objectives, p. 5                       | 3       | State specific objectives, including any prespecified hypotheses                                                                                                                                                                                                                                                                                                                                                                                                                                                                                                                                                                                                                                 |
| <b>Methods</b>                         |         |                                                                                                                                                                                                                                                                                                                                                                                                                                                                                                                                                                                                                                                                                                  |
| Study design, p.6                      | 4       | Present key elements of study design early in the paper                                                                                                                                                                                                                                                                                                                                                                                                                                                                                                                                                                                                                                          |
| Setting, p.6                           | 5       | Describe the setting, locations, and relevant dates, including periods of recruitment, exposure, follow-up, and data collection                                                                                                                                                                                                                                                                                                                                                                                                                                                                                                                                                                  |
| Participants, p.6                      | 6       | (a) <i>Cohort study</i> —Give the eligibility criteria, and the sources and methods of selection of participants. Describe methods of follow-up<br><i>Case-control study</i> —Give the eligibility criteria, and the sources and methods of case ascertainment and control selection. Give the rationale for the choice of cases and controls<br><i>Cross-sectional study</i> —Give the eligibility criteria, and the sources and methods of selection of participants<br>(b) <i>Cohort study</i> —For matched studies, give matching criteria and number of exposed and unexposed<br><i>Case-control study</i> —For matched studies, give matching criteria and the number of controls per case |
| Variables, p.6                         | 7       | Clearly define all outcomes, exposures, predictors, potential confounders, and effect modifiers. Give diagnostic criteria, if applicable                                                                                                                                                                                                                                                                                                                                                                                                                                                                                                                                                         |
| Data sources/<br>measurement,<br>p.6-8 | 8*      | For each variable of interest, give sources of data and details of methods of assessment (measurement). Describe comparability of assessment methods if there is more than one group                                                                                                                                                                                                                                                                                                                                                                                                                                                                                                             |
| Bias, p.6                              | 9       | Describe any efforts to address potential sources of bias                                                                                                                                                                                                                                                                                                                                                                                                                                                                                                                                                                                                                                        |
| Study size, p. 8, 9                    | 10      | Explain how the study size was arrived at                                                                                                                                                                                                                                                                                                                                                                                                                                                                                                                                                                                                                                                        |
| Quantitative variables,<br>p. 18       | 11      | Explain how quantitative variables were handled in the analyses. If applicable, describe which groupings were chosen and why                                                                                                                                                                                                                                                                                                                                                                                                                                                                                                                                                                     |
| Statistical methods, p. 8              | 12      | (a) Describe all statistical methods, including those used to control for confounding<br>(b) Describe any methods used to examine subgroups and interactions<br>(c) Explain how missing data were addressed<br>(d) <i>Cohort study</i> —If applicable, explain how loss to follow-up was addressed<br><i>Case-control study</i> —If applicable, explain how matching of cases and controls was addressed<br><i>Cross-sectional study</i> —If applicable, describe analytical methods taking account of sampling strategy<br>(e) Describe any sensitivity analyses                                                                                                                                |

Continued on next page

**Results**

|                            |     |                                                                                                                                                                                                                                                                                                                                                                                                               |
|----------------------------|-----|---------------------------------------------------------------------------------------------------------------------------------------------------------------------------------------------------------------------------------------------------------------------------------------------------------------------------------------------------------------------------------------------------------------|
| Participants,<br>p. 8, 9   | 13* | (a) Report numbers of individuals at each stage of study—eg numbers potentially eligible, examined for eligibility, confirmed eligible, included in the study, completing follow-up, and analysed<br>(b) Give reasons for non-participation at each stage<br>(c) Consider use of a flow diagram                                                                                                               |
| Descriptive data,<br>p. 10 | 14* | (a) Give characteristics of study participants (eg demographic, clinical, social) and information on exposures and potential confounders<br>(b) Indicate number of participants with missing data for each variable of interest<br>(c) <i>Cohort study</i> —Summarise follow-up time (eg, average and total amount)                                                                                           |
| Outcome data,<br>p. 12     | 15* | <i>Cohort study</i> —Report numbers of outcome events or summary measures over time<br><i>Case-control study</i> —Report numbers in each exposure category, or summary measures of exposure<br><i>Cross-sectional study</i> —Report numbers of outcome events or summary measures                                                                                                                             |
| Main results,<br>p. 13, 14 | 16  | (a) Give unadjusted estimates and, if applicable, confounder-adjusted estimates and their precision (eg, 95% confidence interval). Make clear which confounders were adjusted for and why they were included<br>(b) Report category boundaries when continuous variables were categorized<br>(c) If relevant, consider translating estimates of relative risk into absolute risk for a meaningful time period |
| Other analyses,<br>p. 18   | 17  | Report other analyses done—eg analyses of subgroups and interactions, and sensitivity analyses                                                                                                                                                                                                                                                                                                                |

**Discussion**

|                             |    |                                                                                                                                                                            |
|-----------------------------|----|----------------------------------------------------------------------------------------------------------------------------------------------------------------------------|
| Key results, p. 15,<br>16   | 18 | Summarise key results with reference to study objectives                                                                                                                   |
| Limitations, p. 18          | 19 | Discuss limitations of the study, taking into account sources of potential bias or imprecision. Discuss both direction and magnitude of any potential bias                 |
| Interpretation,<br>p.17, 18 | 20 | Give a cautious overall interpretation of results considering objectives, limitations, multiplicity of analyses, results from similar studies, and other relevant evidence |
| Generalisability,<br>p 18   | 21 | Discuss the generalisability (external validity) of the study results                                                                                                      |

**Other information**

|               |    |                                                                                                                                                               |
|---------------|----|---------------------------------------------------------------------------------------------------------------------------------------------------------------|
| Funding<br>NA | 22 | Give the source of funding and the role of the funders for the present study and, if applicable, for the original study on which the present article is based |
|---------------|----|---------------------------------------------------------------------------------------------------------------------------------------------------------------|

\*Give information separately for cases and controls in case-control studies and, if applicable, for exposed and unexposed groups in cohort and cross-sectional studies.

**Note:** An Explanation and Elaboration article discusses each checklist item and gives methodological background and published examples of transparent reporting. The STROBE checklist is best used in conjunction with this article (freely available on the Web sites of PLoS Medicine at <http://www.plosmedicine.org/>, Annals of Internal Medicine at <http://www.annals.org/>, and Epidemiology at <http://www.epidem.com/>). Information on the STROBE Initiative is available at [www.strobe-statement.org](http://www.strobe-statement.org).
